# Supplementary material
Source: PubMed Central journal article supplement (PMC7585744)
Supplement: NIHMS1637679-supplement-Supplementary_materials.pdf [file NIHMS1637679-supplement-Supplementary_materials.pdf]

Supplemental Information

## **Novel Reversible Fluorescent Glycan Linker for Functional Glycomics**

Mohui Wei, Tanya R. McKittrick, Akul Y. Mehta, Chao Gao, Nan Jia, Alyssa M. McQuillan, Jamie Heimbürg-Molinaro, Lijun Sun, Richard D. Cummings\*

Department of Surgery, Beth Israel Deaconess Medical Center, Harvard Medical School,  
National Center for Functional Glycomics, CLS 11087 - 3 Blackfan Circle, Boston, MA 02115, USA

\*Correspondence: [rcummin1@bidmc.harvard.edu](mailto:rcummin1@bidmc.harvard.edu)

## GENERAL METHODS

All purchased chemicals were used without further purification. HPLC solvents were purchased from Fisher Scientific. Details of the commercial substances are listed in the Key Resources Table. HPLC analysis of the F-MAPA- and AEAB-labeled glycans was performed on a Shimadzu HPLC CBM-20A system. It contained a UV detector SPD-20AV and a fluorescence detector RF-20A. Fluorescence at 265 nm excitation (Ex) and 315 nm emission (Em) were used to detect F-MAPA-labeled glycans and 330 nm excitation (Ex) and 420 nm emission (Em) were used to detect AEAB-labeled glycans. A 250 x 4.6 mm Zorbax NH2 column was used and the mobile phases were acetonitrile, water, and 250mM ammonium acetate. The concentration of water increased from 16% to 40% and the ratio of ammonium acetate from 4% to 50% over 60 min. An UltrafleXtreme MALDI-TOF/TOF system from Bruker was used for MALDI-TOF MS analysis of the glycans and their conjugates. 2,5-Dihydroxybenzoic acid (20 mg/ml in ACN:H<sub>2</sub>O = 1:1) was used as the matrix. ESI-MS analysis was performed on an Orbitrap Fusion Lumos from Thermo Fisher Scientific. <sup>1</sup>H and <sup>13</sup>C NMR spectra were recorded on Varian Mercury 400 MHz. Chemical shifts are reported in parts per million (ppm) relative to CDCl<sub>3</sub>, MeOD or D<sub>2</sub>O as the internal standard. NMR data are presented as follows: Chemical shift, multiplicity (s = singlet, d = doublet, t = triplet, dd = doublet of doublet, m = multiplet and/or multiple resonances); coupling constant are reported in Hertz (Hz). All NMR signals were assigned on the basis of <sup>1</sup>H <sup>13</sup>C NMR, APT, HSQC, TOCSY and COSY experiments.

## QUANTIFICATION AND STATISTICAL ANALYSIS

### Data Quantitation for the Array Analysis

The signal intensities were quantified by the GenePix Pro 7 that is associated with the microarray scanner and processed by Excel (Microsoft). The results are shown as relative fluorescence units (RFUs) by averaging the background-subtracted fluorescence signals of four replicate spots with error bars representing the standard deviation among the four values.

## DATA AND SOFTWARE AVAILABILITY

All of the glycan microarray datasets related to this work are shown in the Supplemental Information and are publicly available at the National Center for Functional Glycomics (NCFG) website: <https://ncfg.hms.harvard.edu/ncfg-data>

## KEY RESOURCES TABLE

| REAGENT or RESOURCE                                | SOURCE            | IDENTIFIER       |
|----------------------------------------------------|-------------------|------------------|
| Antibodies                                         |                   |                  |
| Recombinant Human DC-SIGN/CD209 Fc Chimera Protein | R&D Systems       | Cat#: 161-DC-050 |
| Alexa488-labelled goat anti-human IgG              | Life Technologies | Cat#: A-11013    |
| Alexa594 anti-human CD15 Antibody                  | BioLegend         | Cat#: 301917     |
| Rat Anti-Human Cutaneous Lymphocyte Antigen        | BD Pharmingen     | Cat#: 555946     |

|                                            |                                |                 |
|--------------------------------------------|--------------------------------|-----------------|
| Alexa488-labeled goat anti-rat IgM         | Molecular Probes               | Cat#: A-21212   |
| Blood Group Lewis a Antibody (7LE)         | Santa Cruz Biotechnology, Inc. | Cat#: sc-51512  |
| Alexa488-labeled goat anti-mouse IgG       | Invitrogen                     | Cat#: A-11001   |
| Lectins, Chemicals, Glycans                |                                |                 |
| AAL                                        | Vector Labs                    | Cat#: B-1395    |
| UEA-I                                      | Vector Labs                    | Cat#: B-1065    |
| GSL-I b4                                   | Vector Labs                    | Cat#: B-1205    |
| DBA                                        | Vector Labs                    | Cat#: B-1035    |
| Biotinylated hydrazide                     | Vector Labs                    | Cat#: SP-1100   |
| Streptavidin-Cyanine 5                     | Invitrogen                     | Cat#: 434316    |
| Nexterion H NHS functionalized slides      | Schott AG                      | Cat#: 1070936   |
| 3-Aminopropionaldehyde diethylacetal       | Sigma-Alderich                 | Cat#: A8597-25G |
| AEAB                                       | Cummings lab                   |                 |
| di- <i>N</i> -hydroxysuccinimidyl suberate | Sigma-Alderich                 | Cat#: S1885     |
| BSA                                        | Boval BioSolutions, LLC        | Cat#: LY-0081   |
| Blood group glycans                        | ELICITYL                       |                 |
| LNnT                                       | Cummings lab                   |                 |
| Crude egg yolk N-glycans                   | Cummings lab                   |                 |

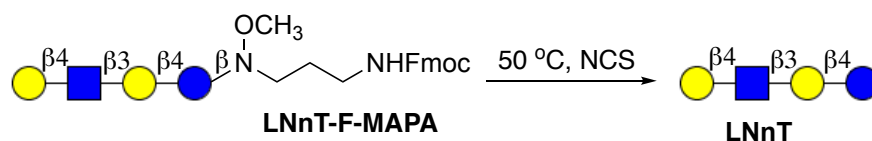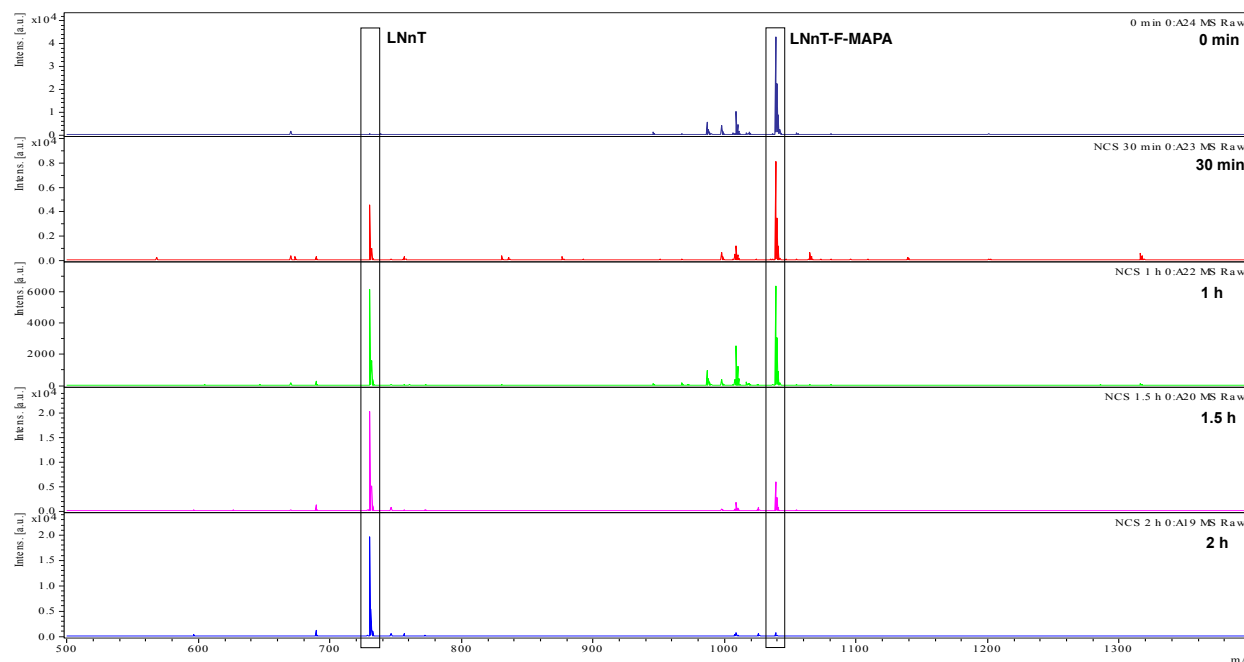

Figure S1. Cleavage of LNnT-F-MAPA by NCS to regenerate free reducing LNnT.

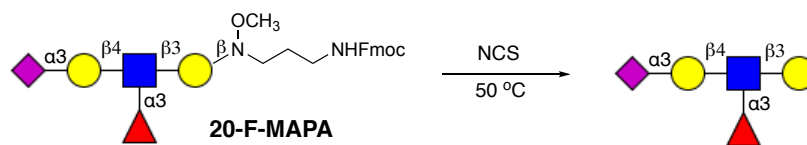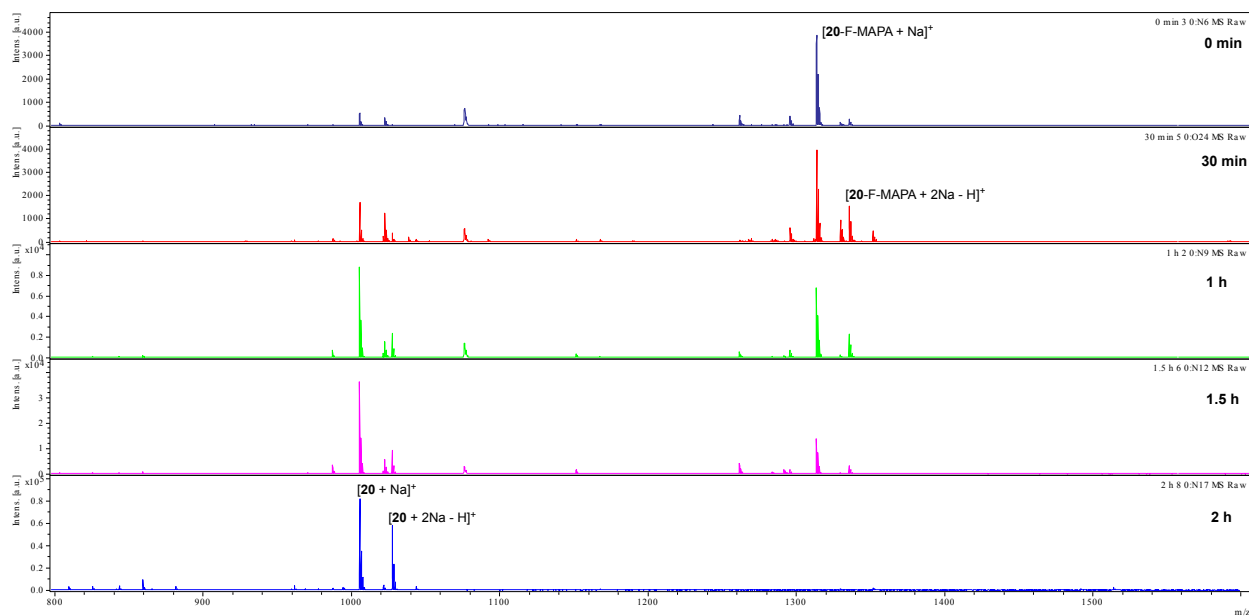

Figure S2. Cleavage of **20-F-MAPA** by NCS to regenerate free reducing **20**.

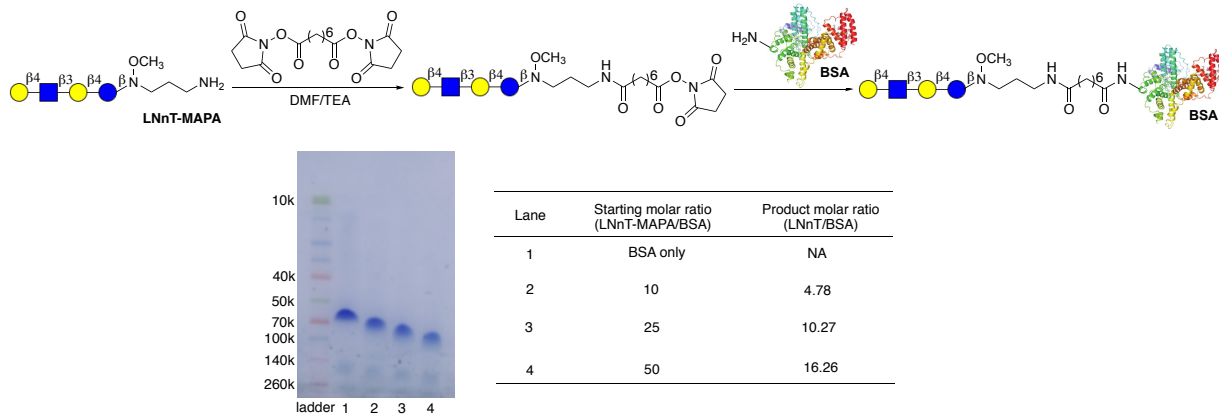

Figure S3. Synthesis of neoglycoprotein.

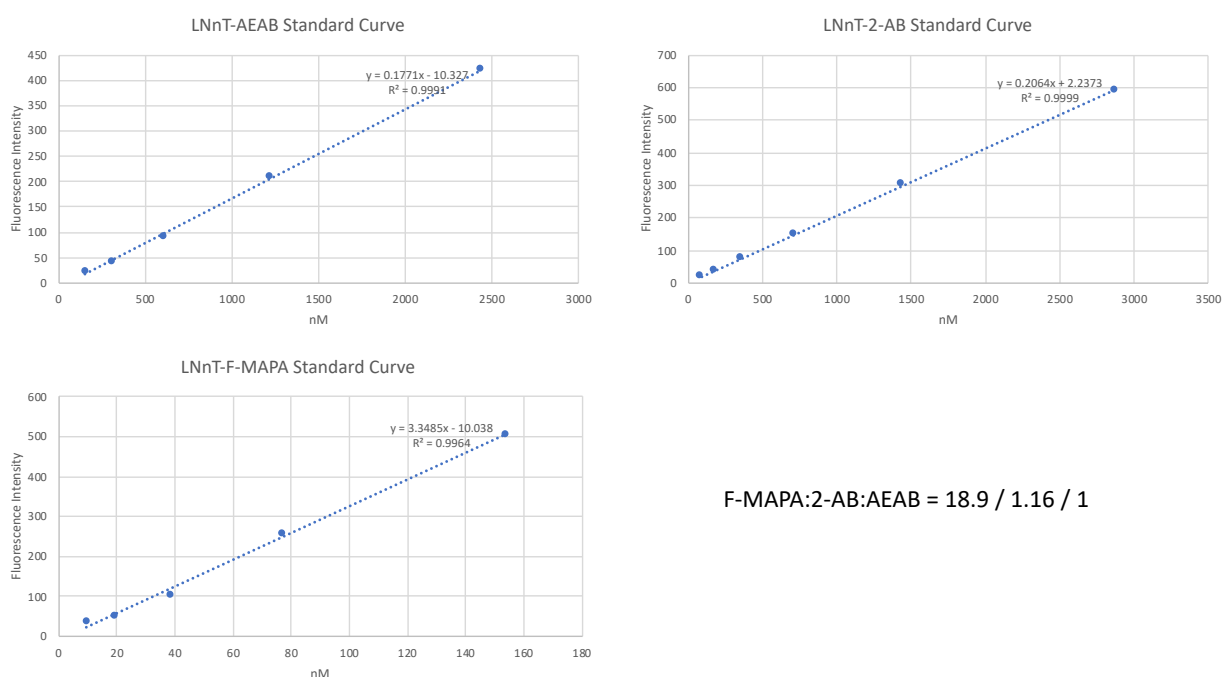

Figure S4. Relative fluorescence sensitivity of F-MAPA, 2-AB and AEAB.

## NMR data and Spectra

LNT-MAPA:  $^1\text{H}$  NMR (400 MHz,  $\text{D}_2\text{O}$ ):  $\delta$  4.60 (d,  $J = 8.0$  Hz, GlcNAc H1), 4.37 (d,  $J = 8.0$  Hz, Gal-2 H1), 4.33 (d,  $J = 8.0$  Hz, Gal-1 H1), 4.12 (d,  $J = 8.8$  Hz, Glc H1), 4.07 (d,  $J = 3.2$  Hz, 1 H), 3.88 (m, 2 H), 3.84 (m, 1 H), 3.77 (m, 2 H), 3.71 (m, 3 H), 3.68 (m, 2 H), 3.65 (m, 3 H), 3.64 (m, 2 H), 3.58 (m, 1 H), 3.57 (m, 1 H), 3.55 (s, 3 H), 3.54 (m, 1 H), 3.52 (m, 1 H), 3.51 (m, 2 H), 3.46 (m, 2 H), 3.07 (m, 1 H), 2.96 (t,  $J = 7.2$  Hz, 2 H), 1.95 (s, 3 H), 1.85 (m, 2 H);  $^{13}\text{C}$  NMR from HSQC (100 MHz,  $\text{D}_2\text{O}$ ):  $\delta$  102.9, 102.8, 102.7, 91.8, 82.1, 78.2, 78.1, 76.4, 75.8, 75.4, 75.0, 74.5, 72.5, 72.1, 70.0,

69.4, 68.5, 68.3, 62.1, 60.9, 60.2, 59.9, 59.7, 55.2, 49.9, 38.2, 25.5, 22.1. ESI HRMS calcd for  $C_{30}H_{55}N_3NaO_{21}$   $[M+Na]^+$  816.3220, found 816.3203.

### Fmoc-3-amino propionaldehyde NMR spectra

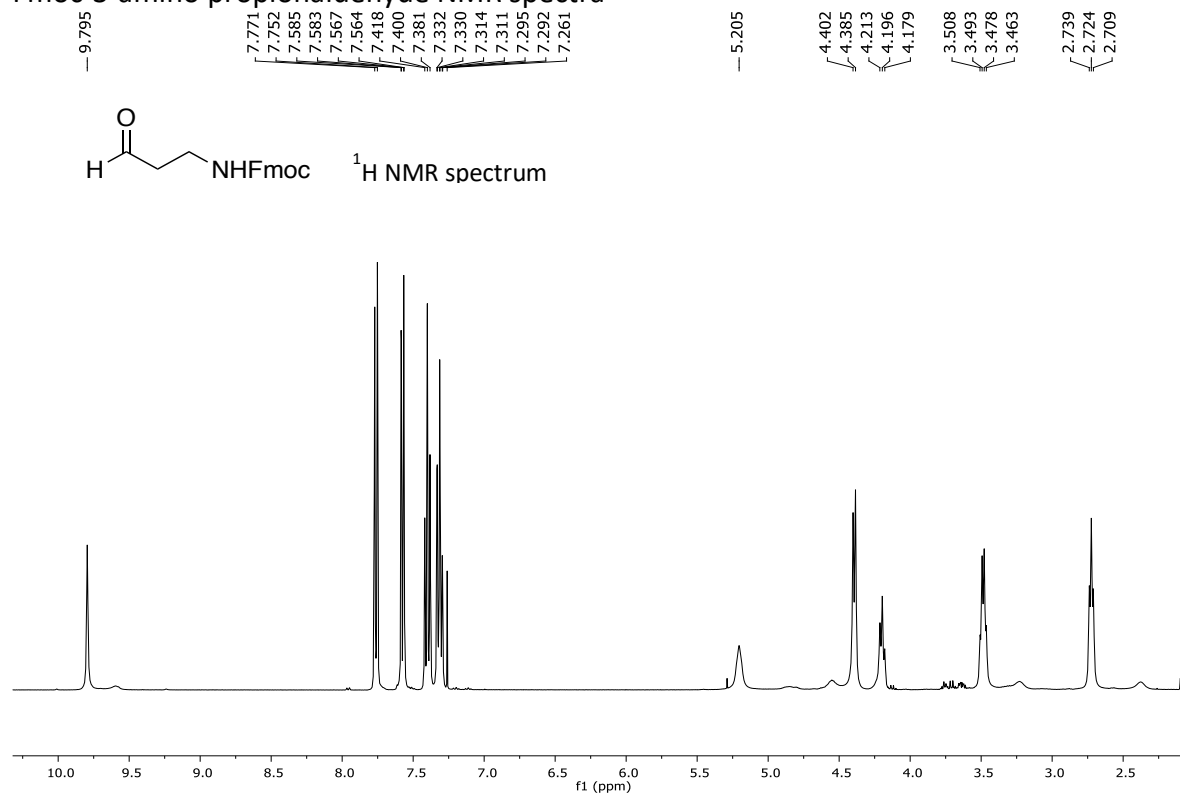

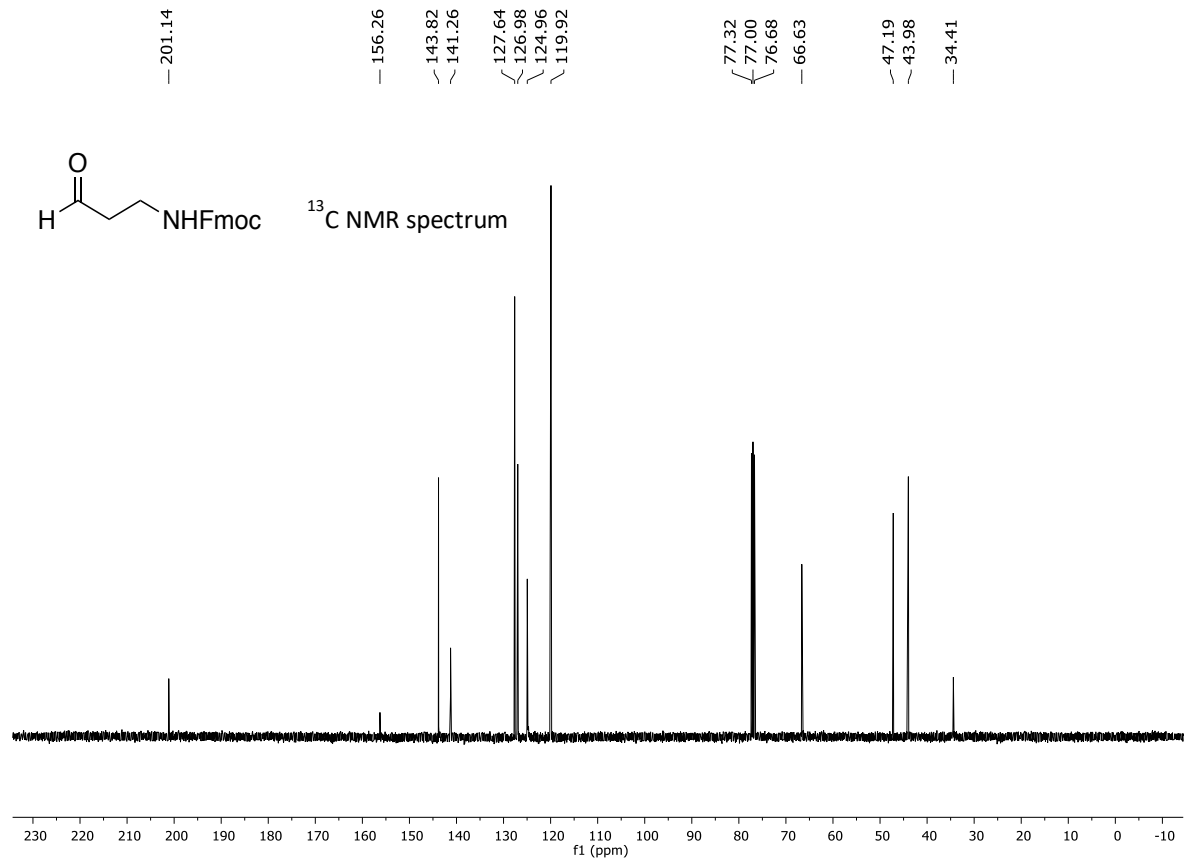

F-MAPA NMR spectra

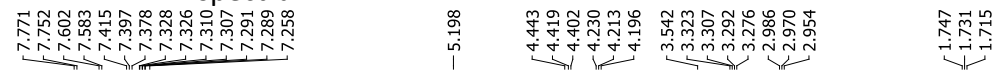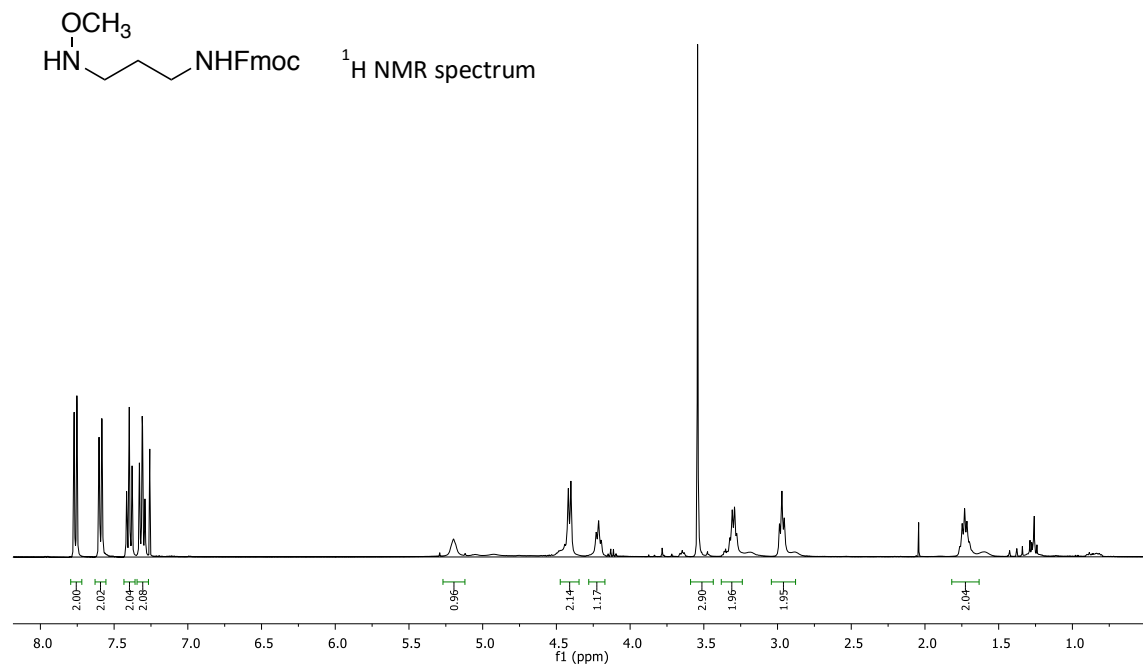

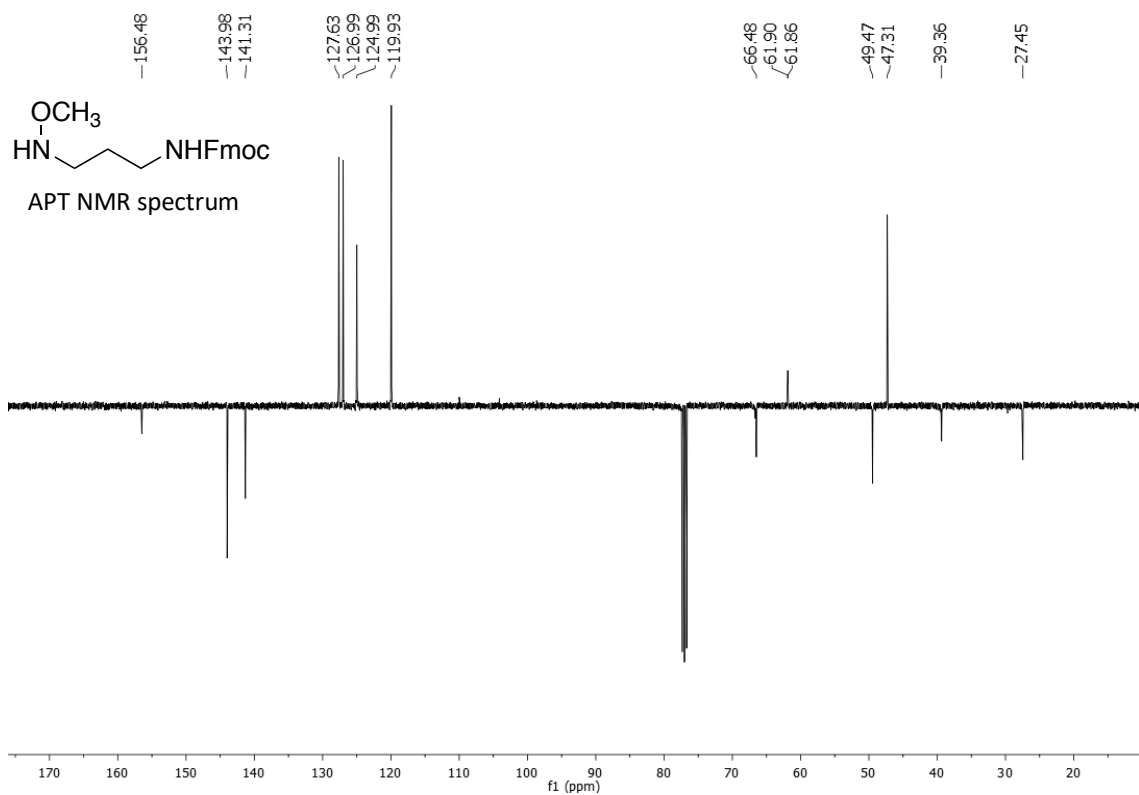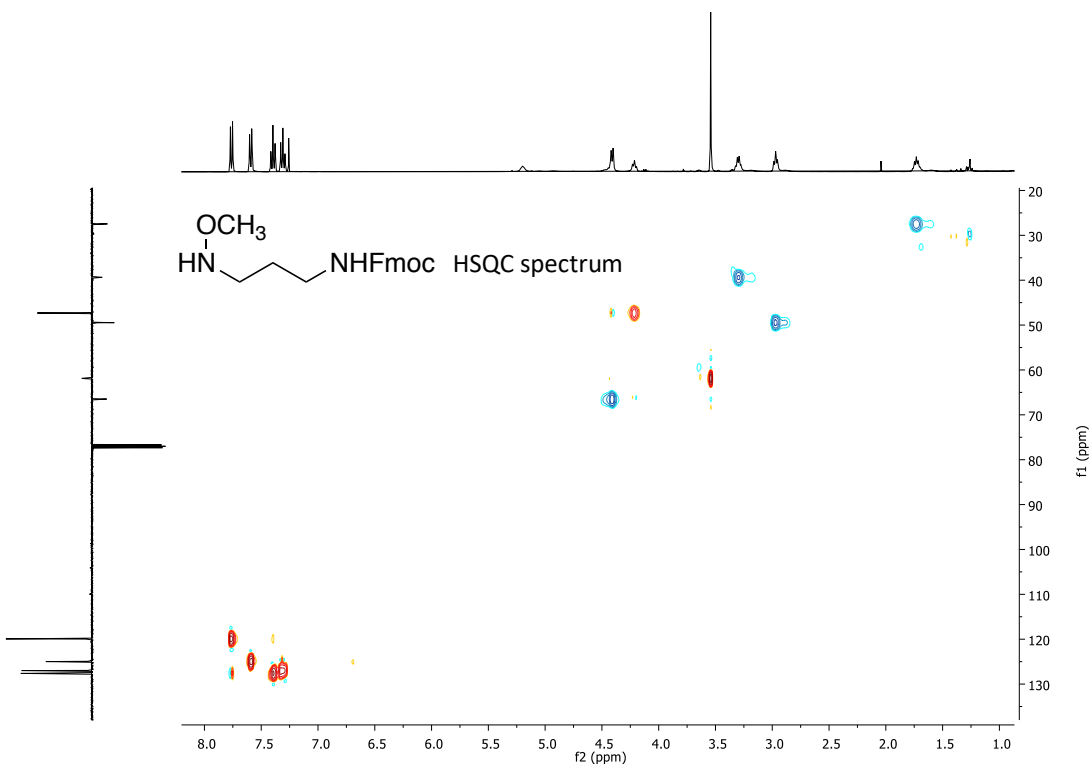



# F-MAPA-HCl NMR spectra

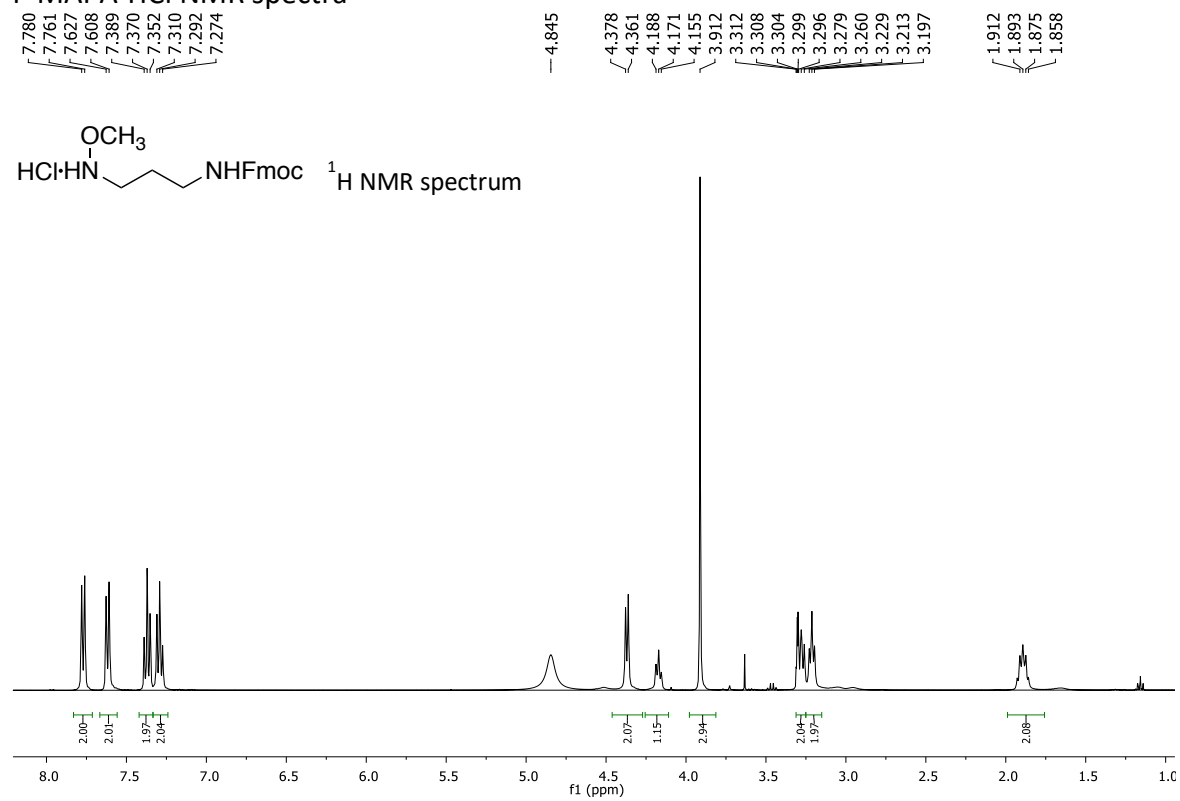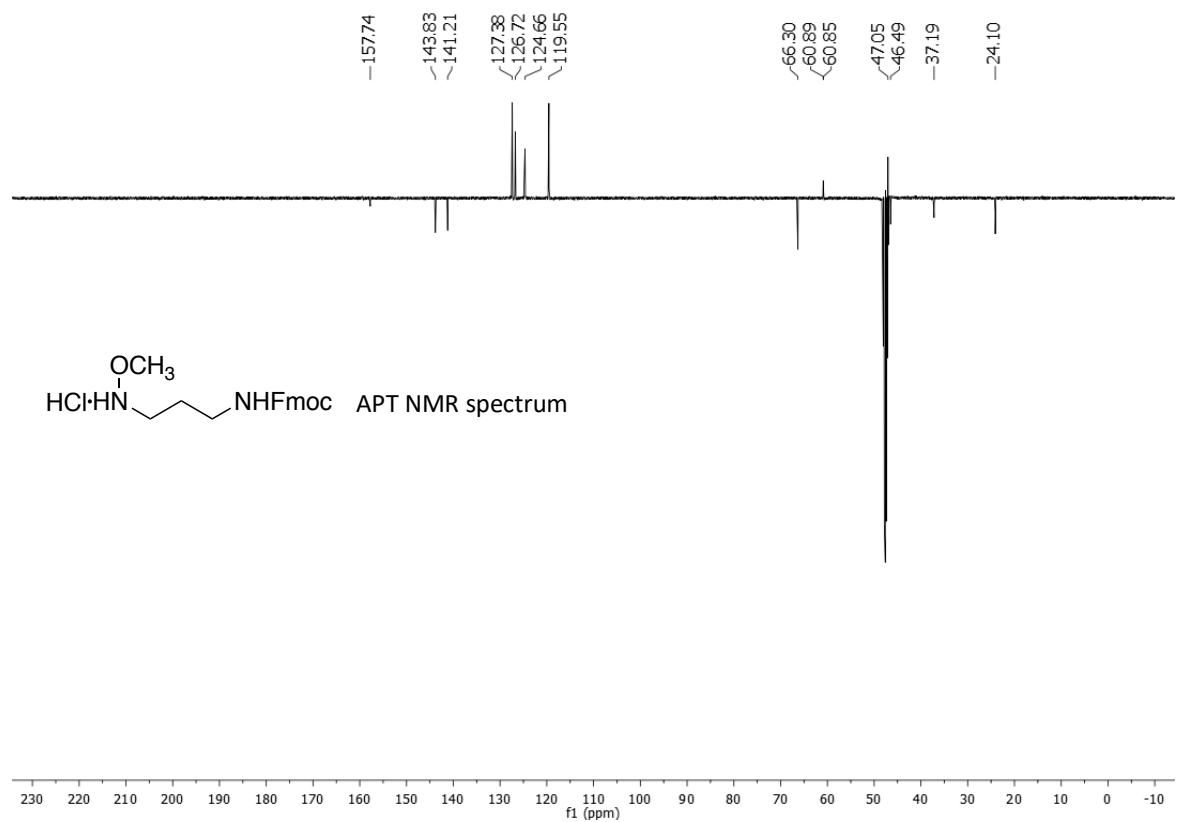

LNnT-MAPA NMR spectra

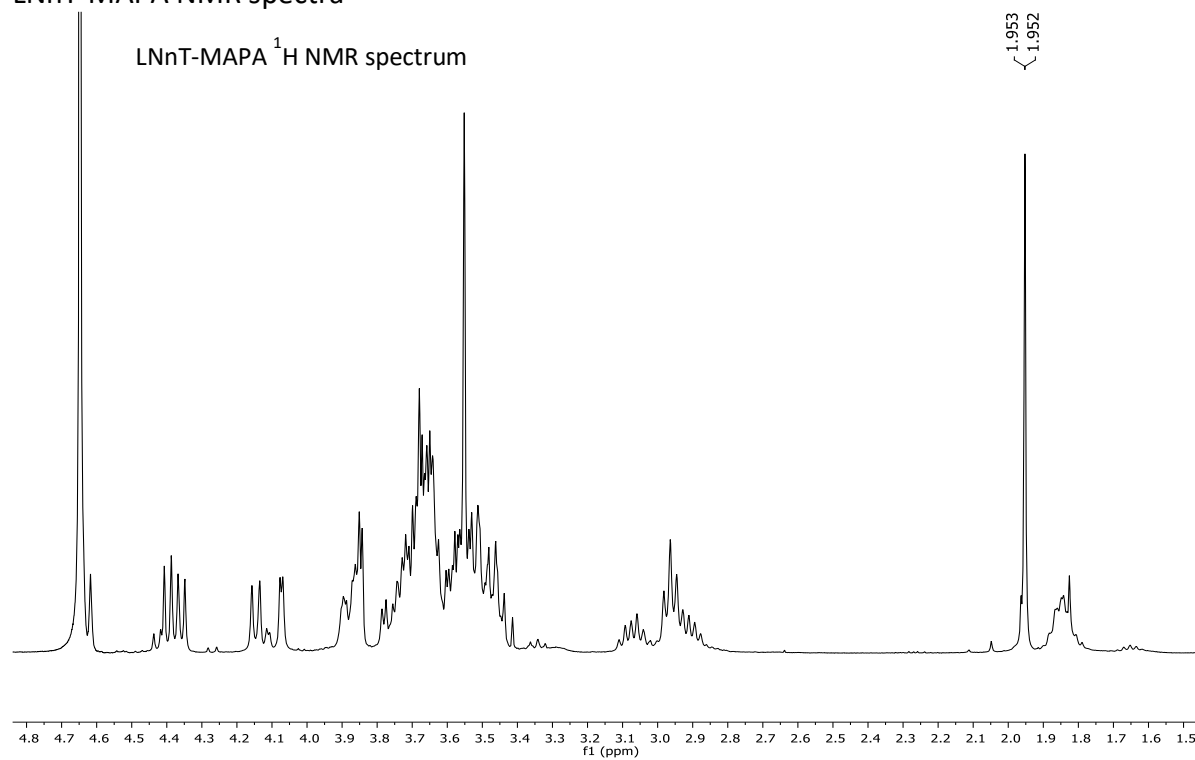

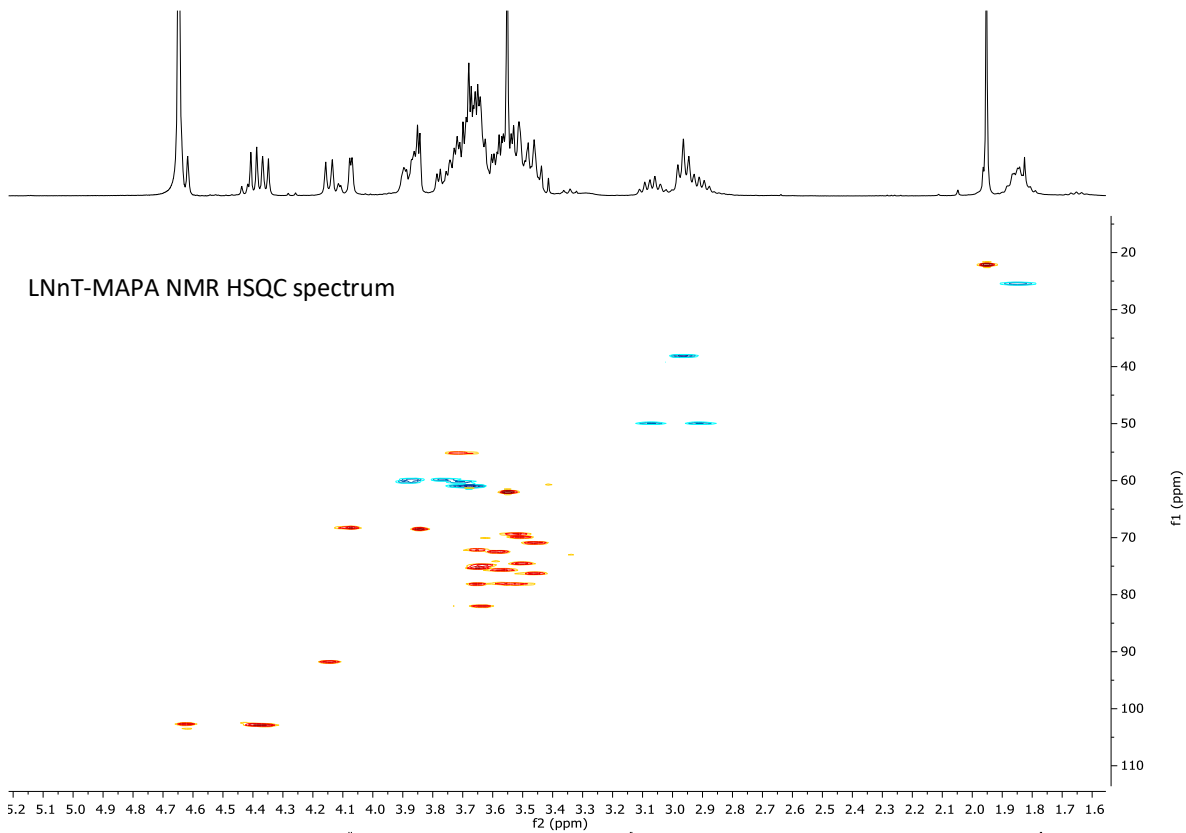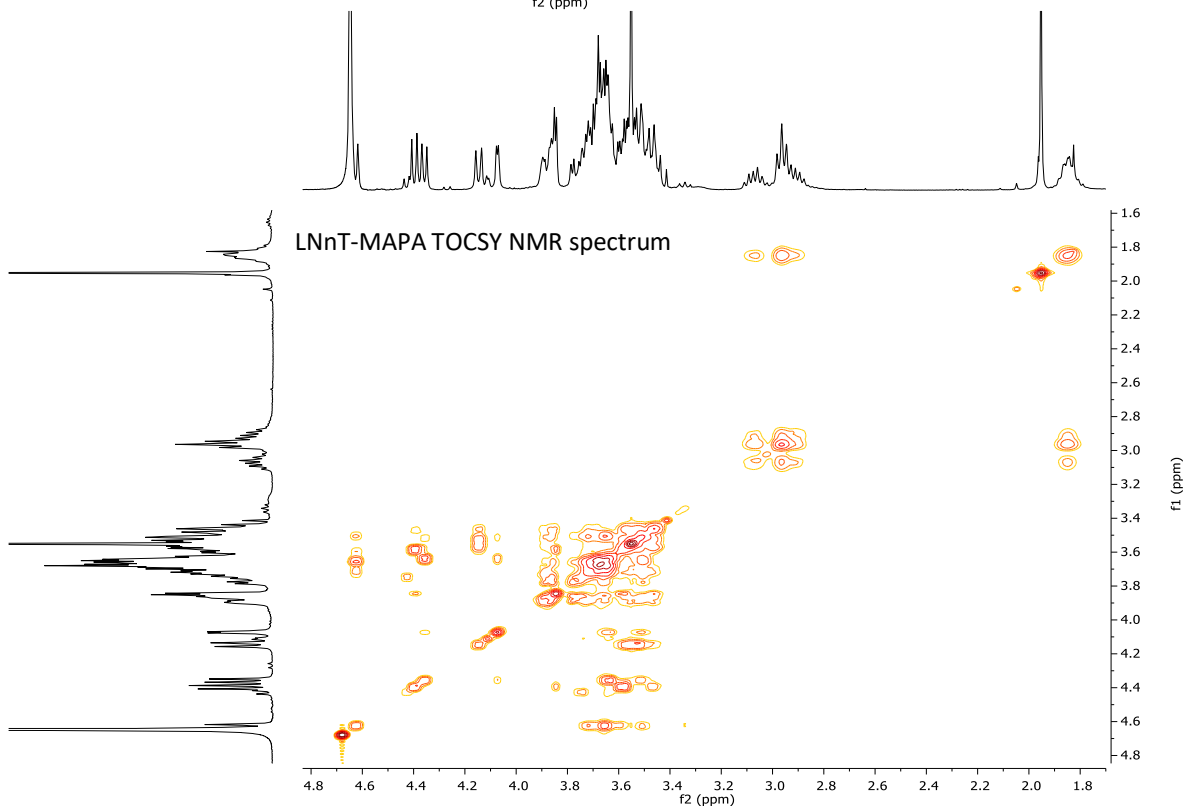

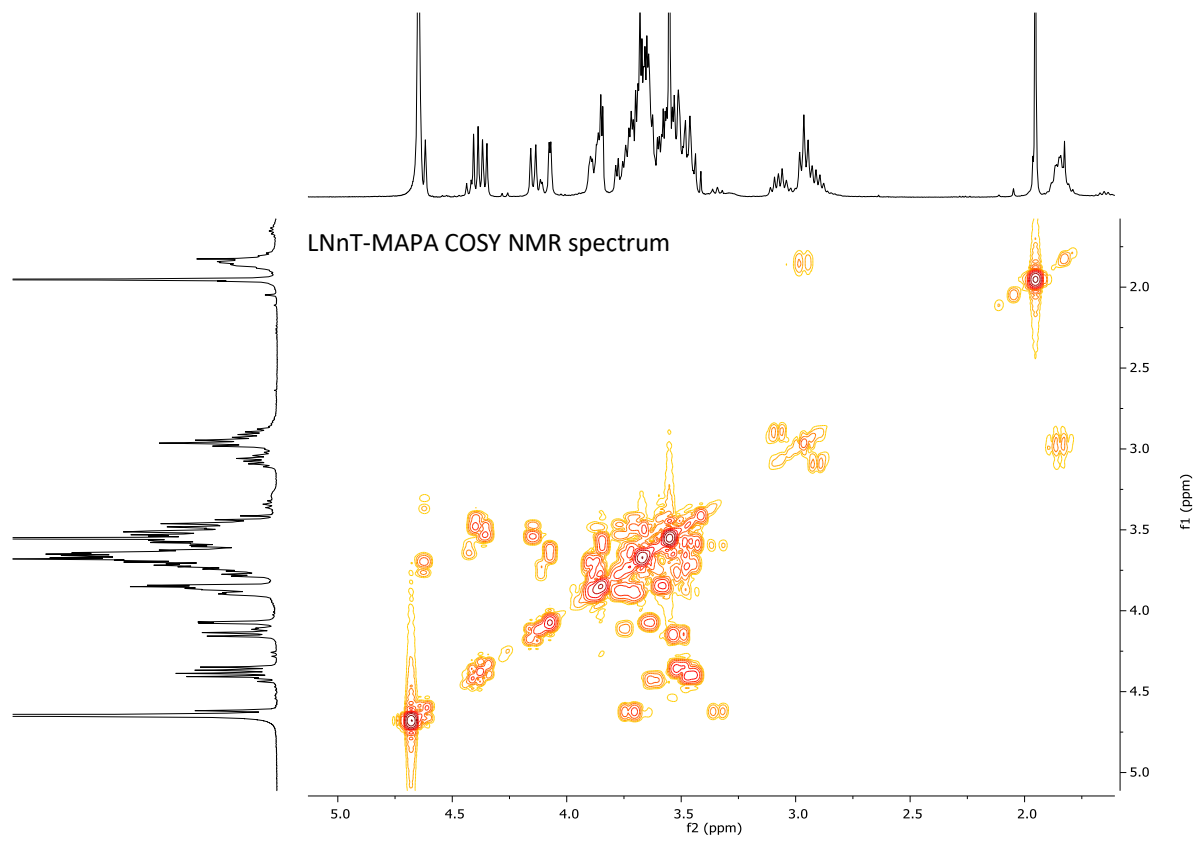

HPLC profiles of Glycan-F-MAPA, and Mass spectra of Glycan-F-MAPA, Glycan-MAPA and Glycan-AEAB.

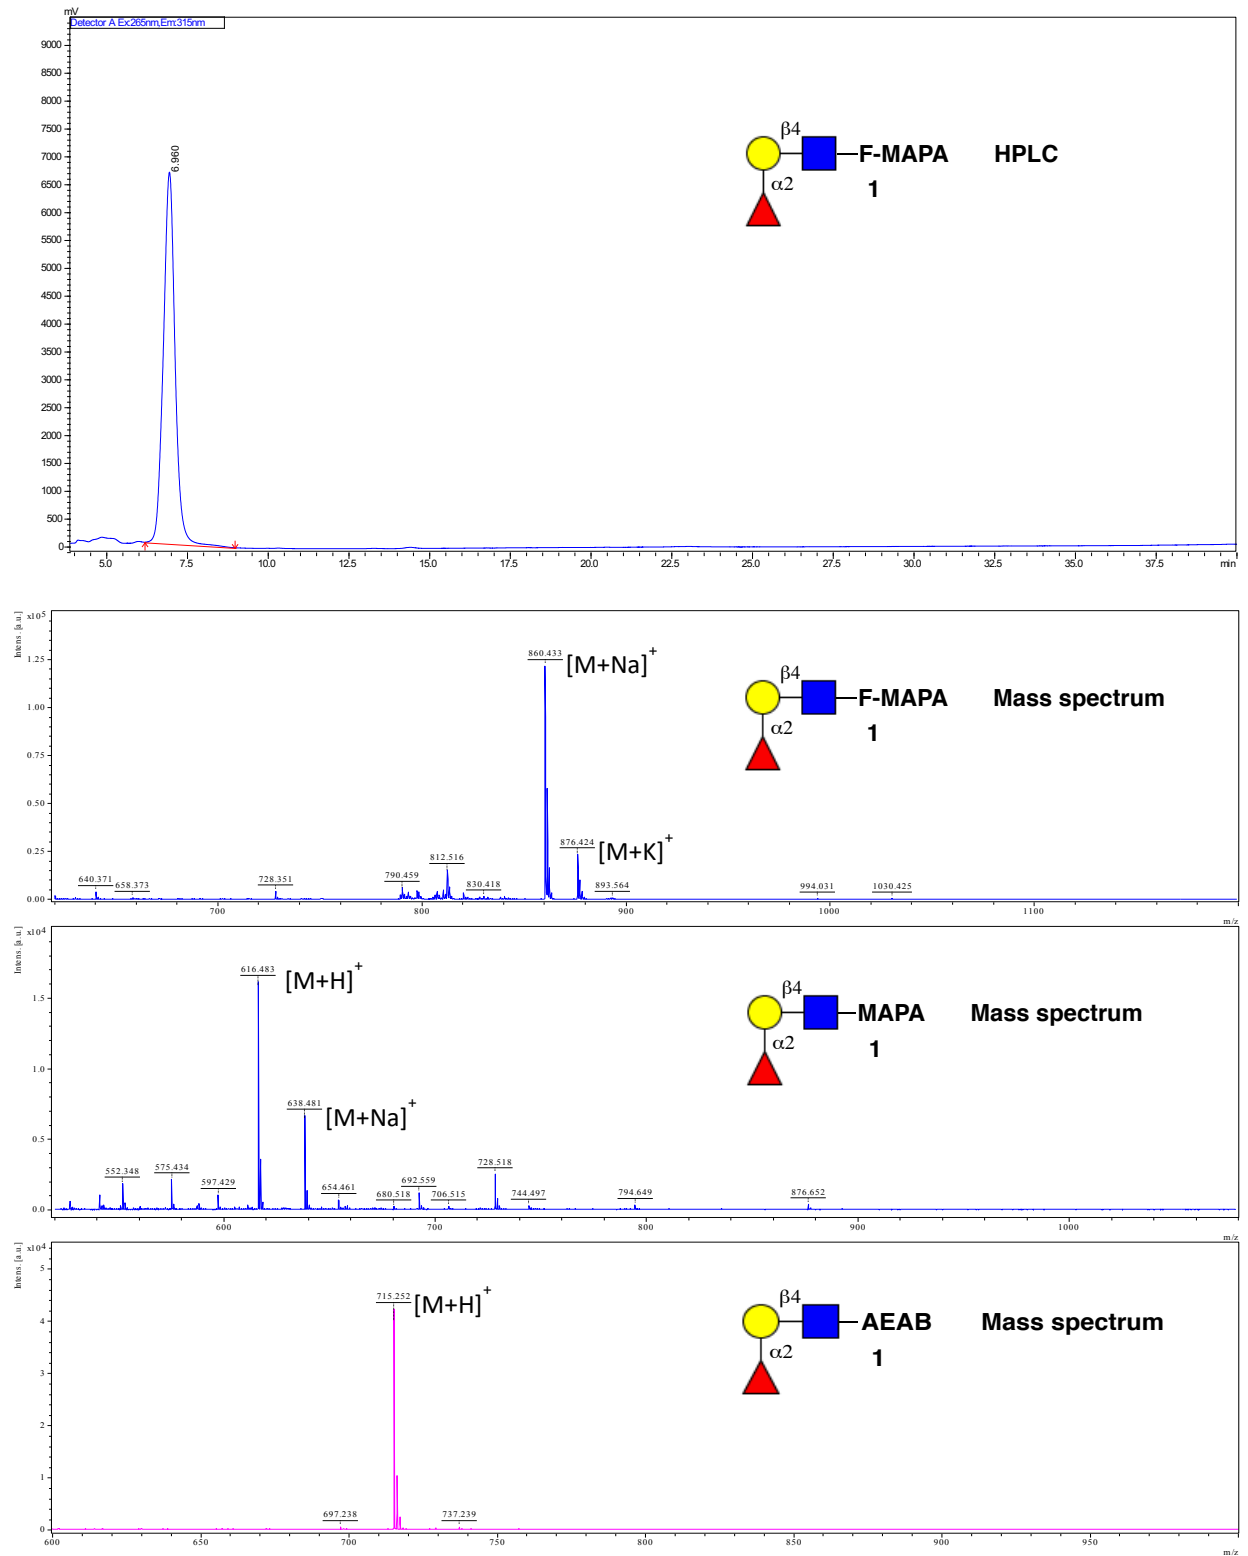

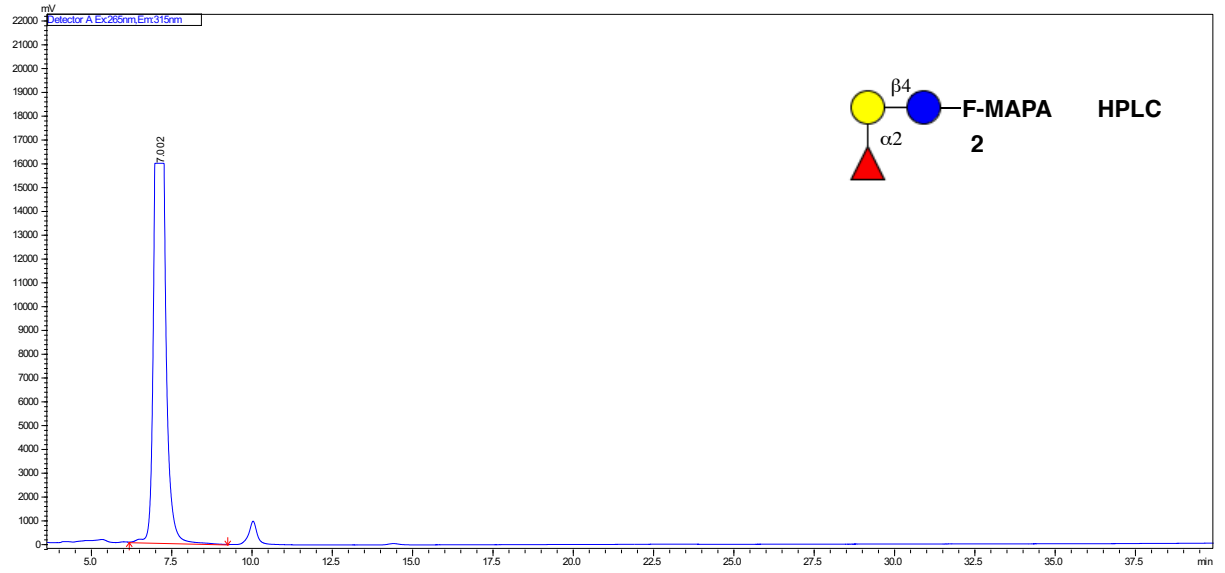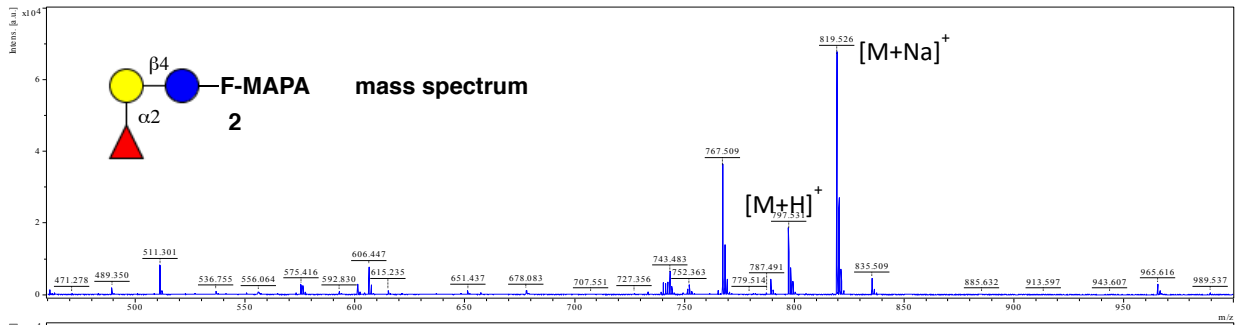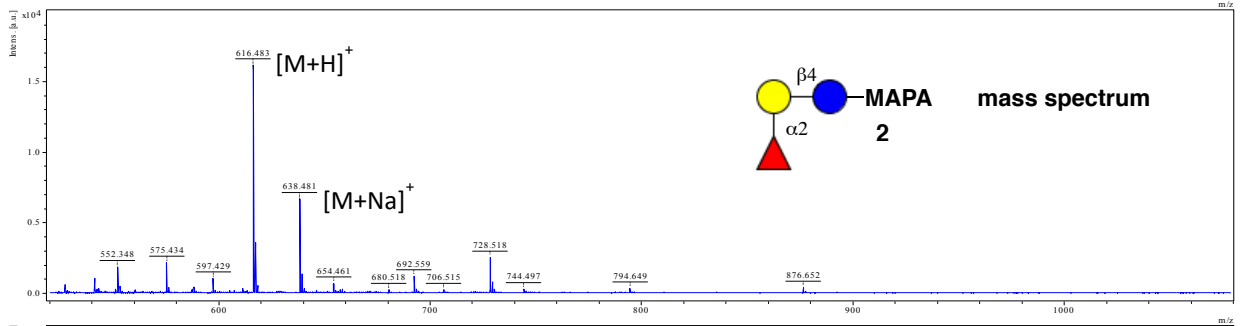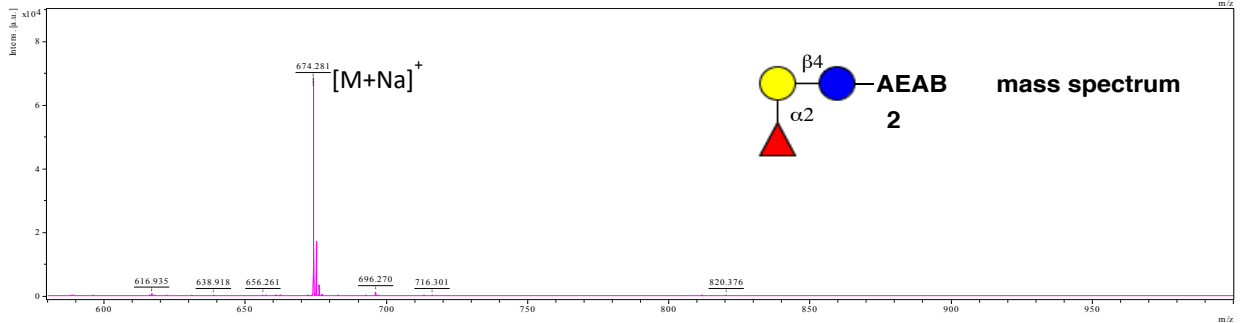

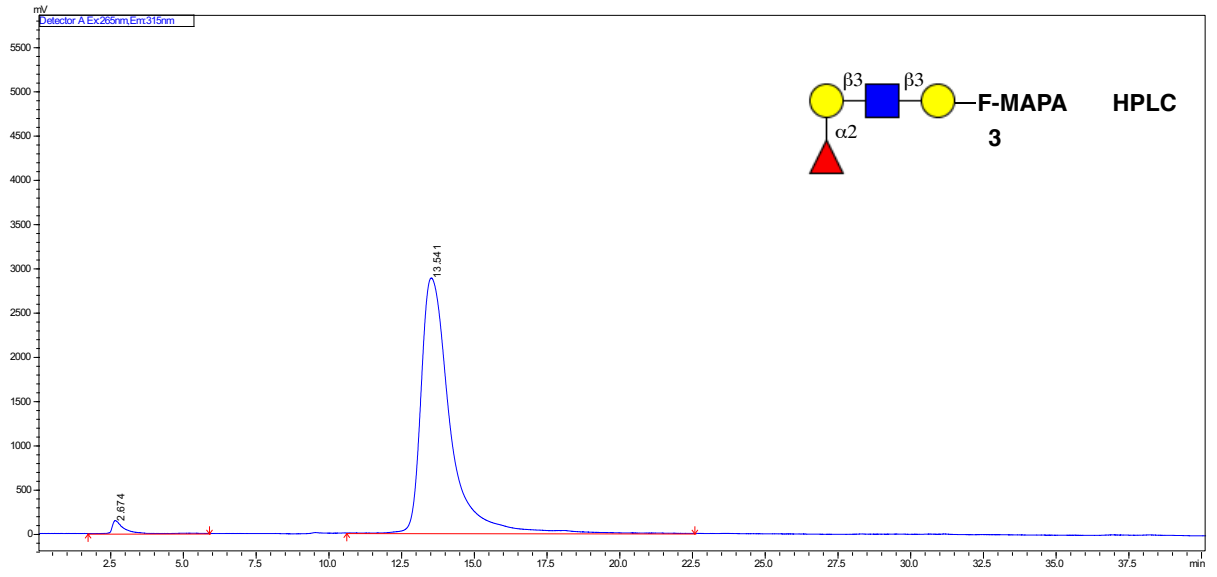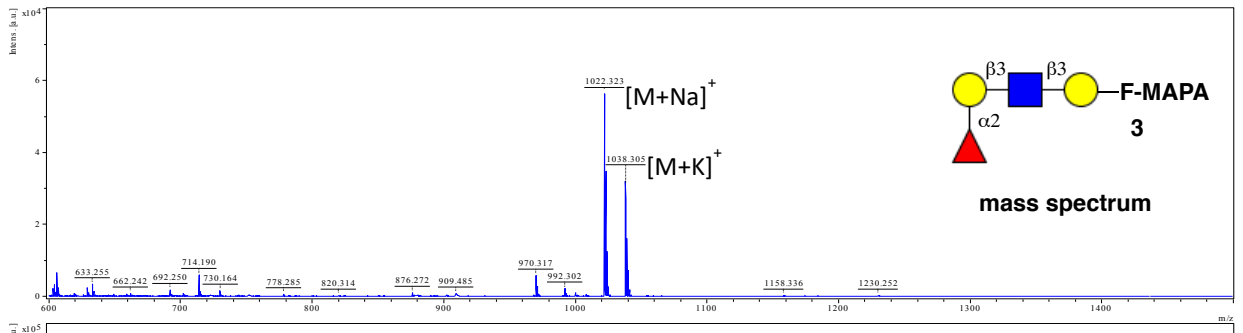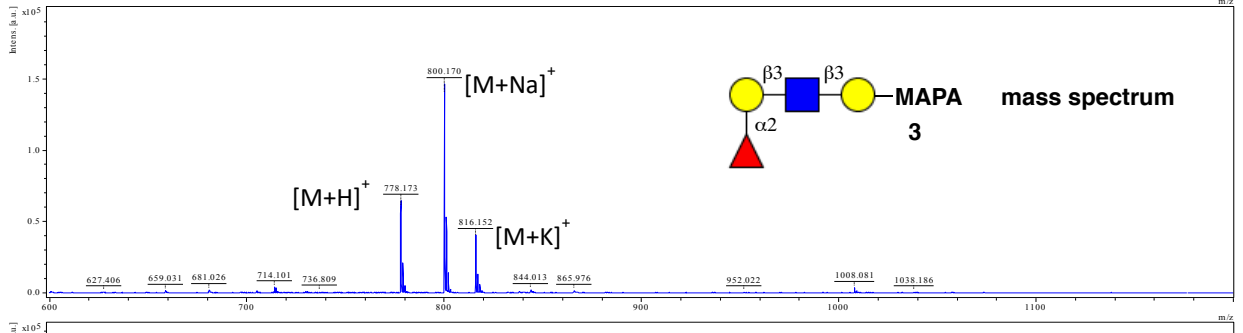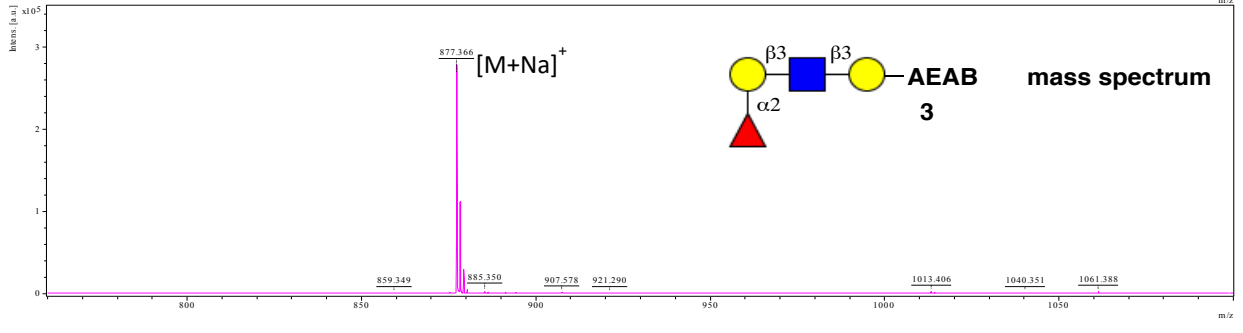

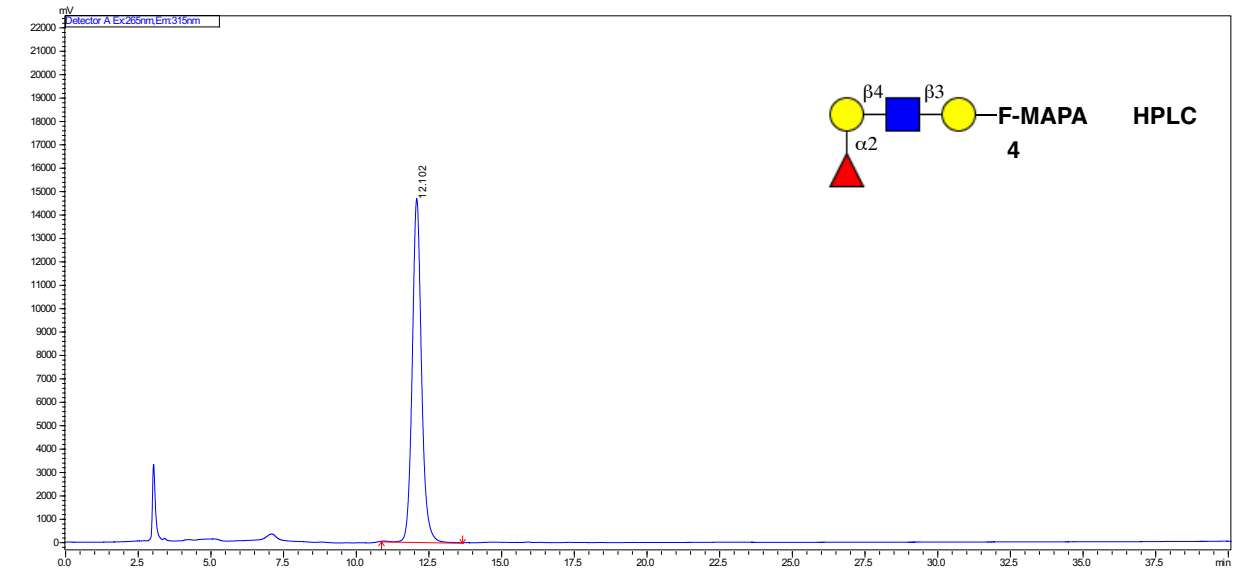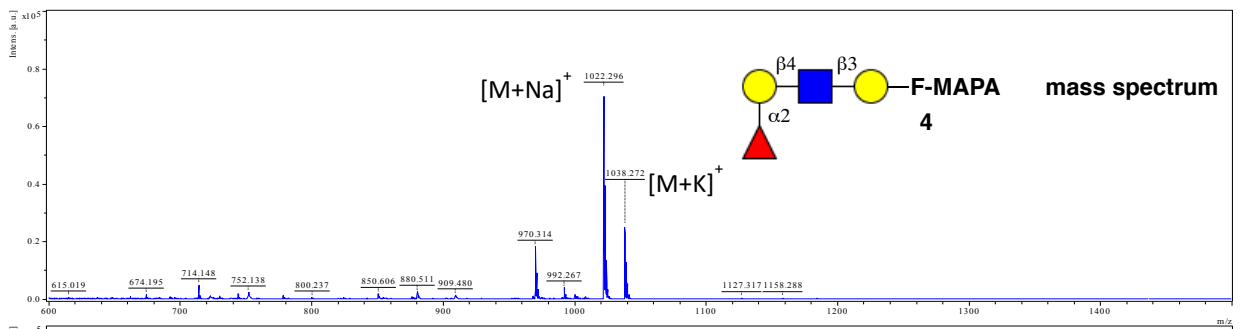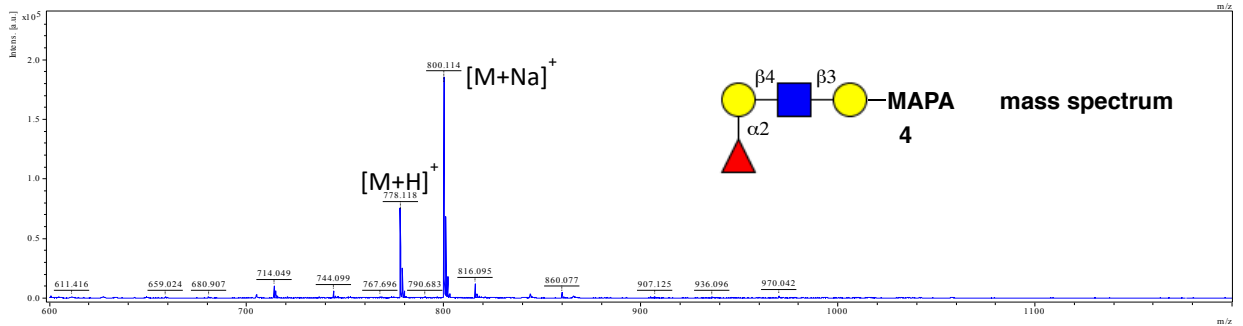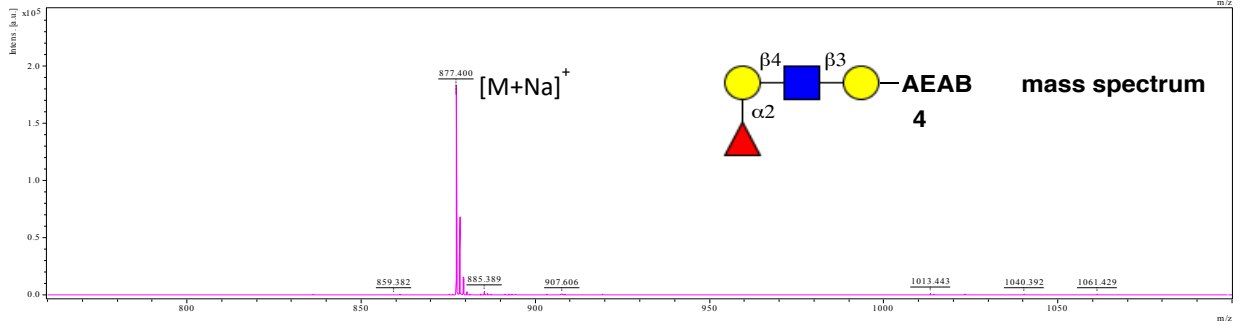



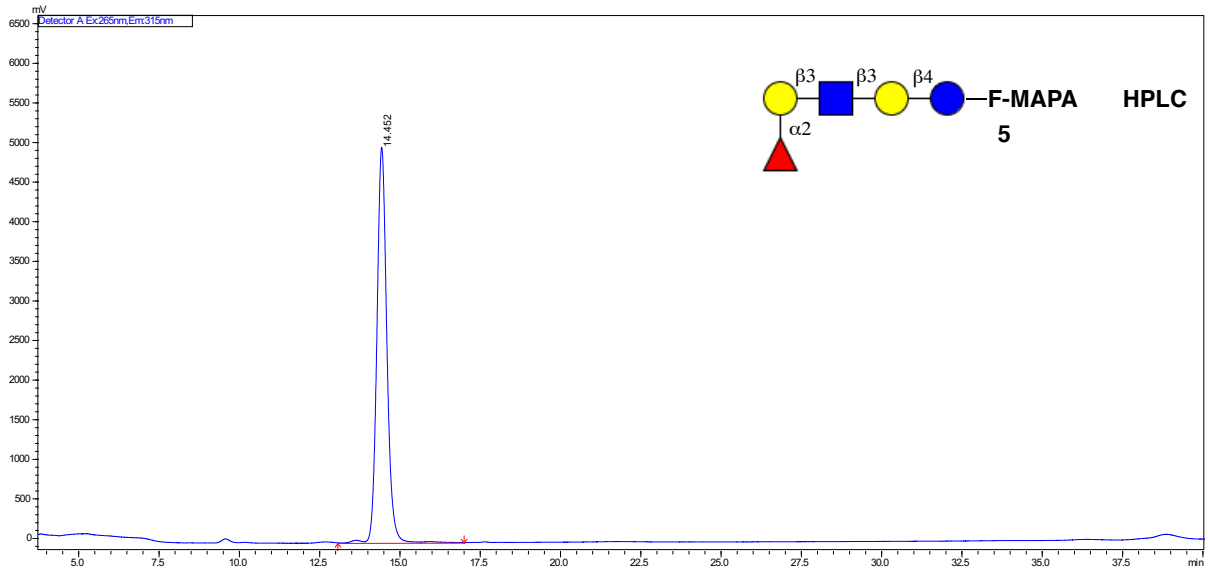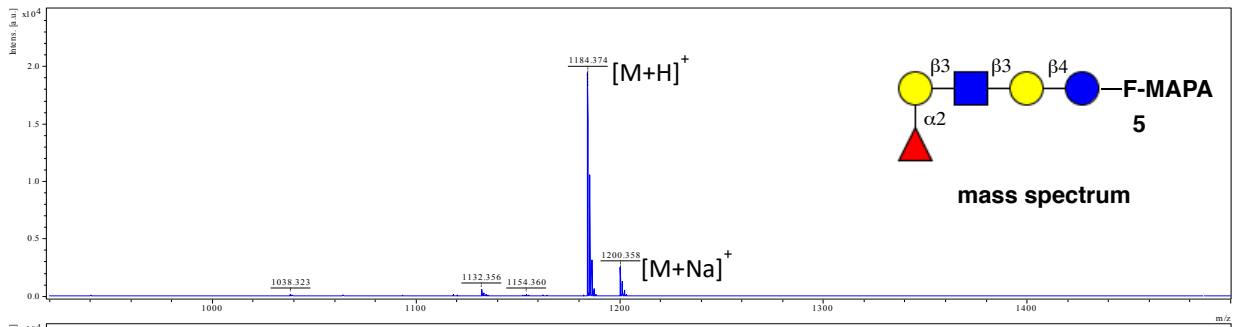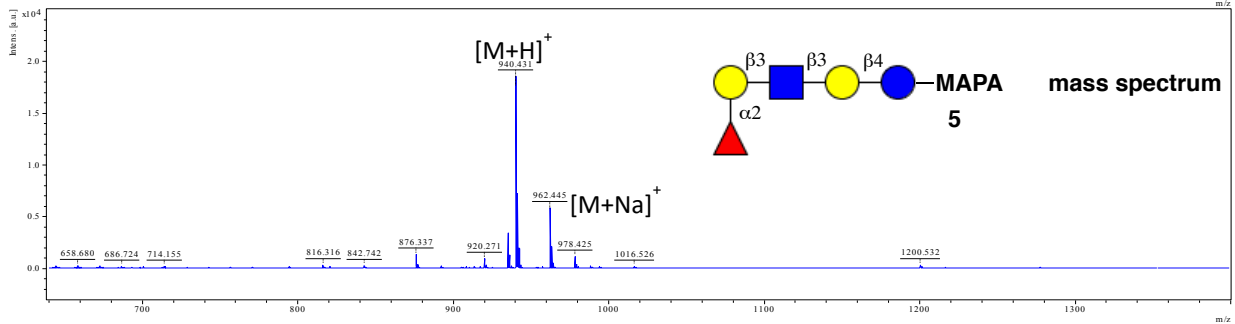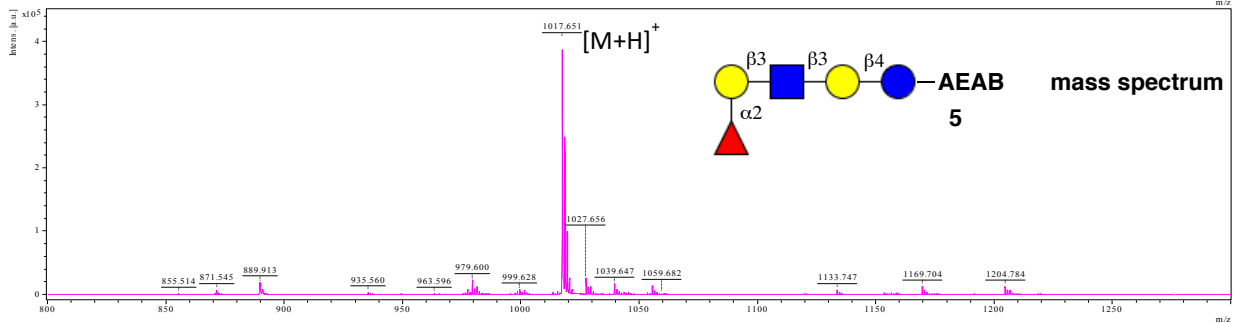

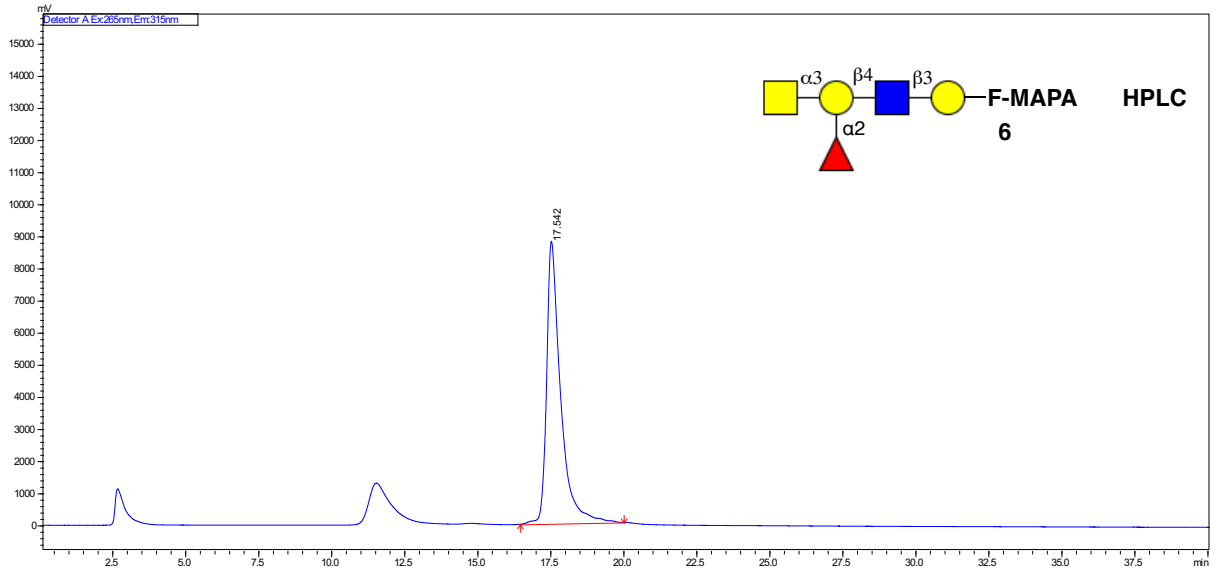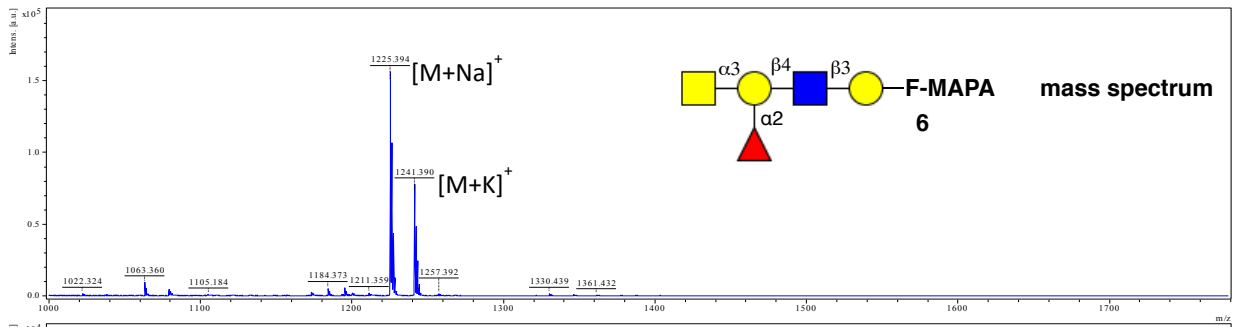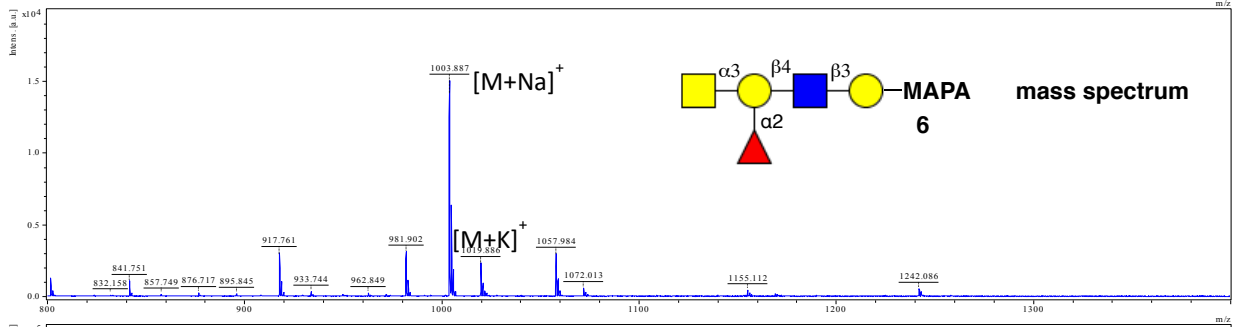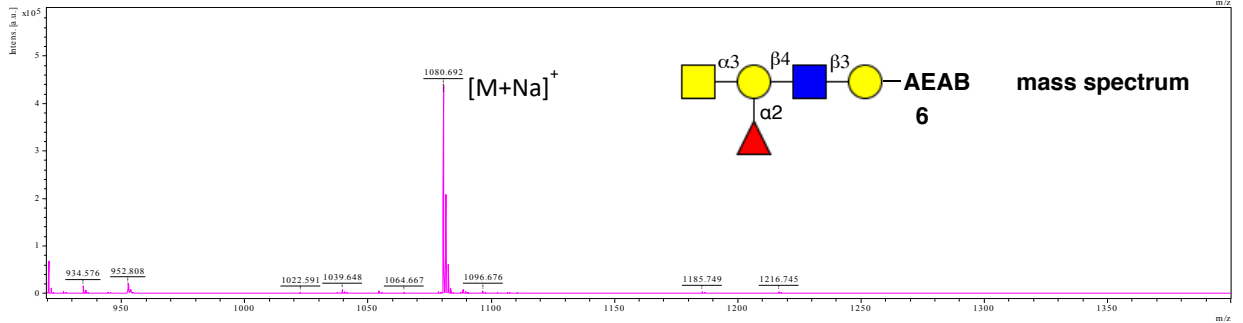

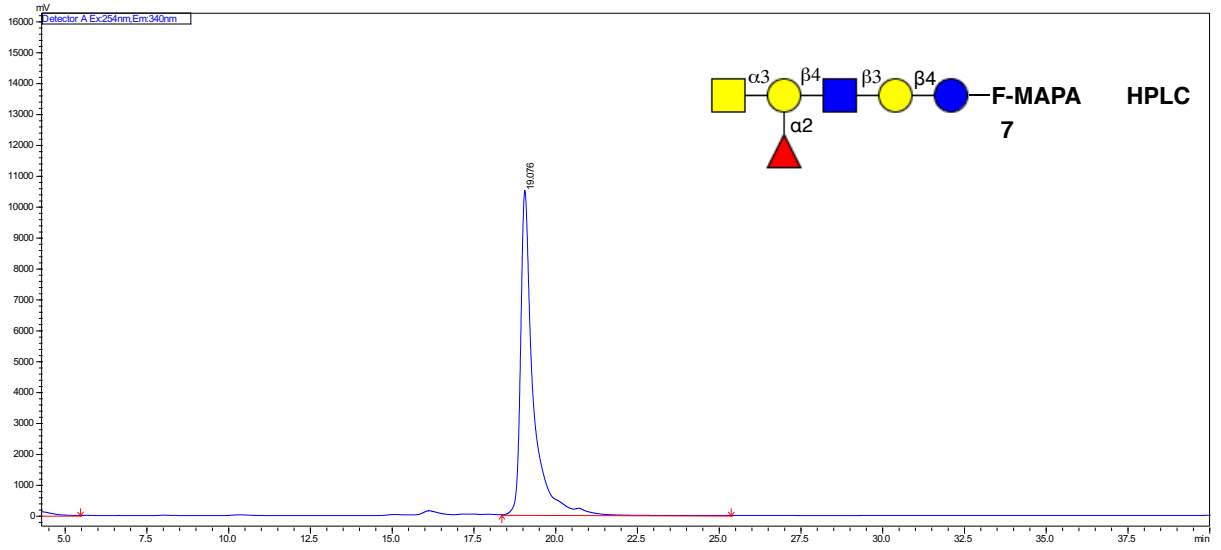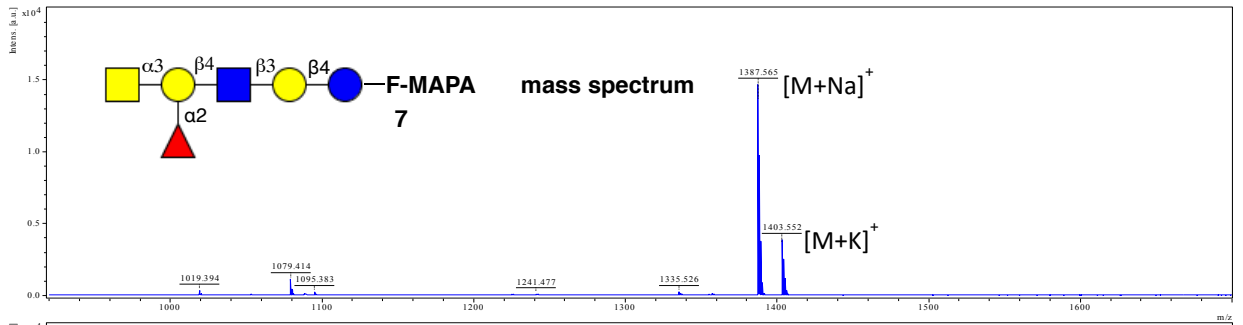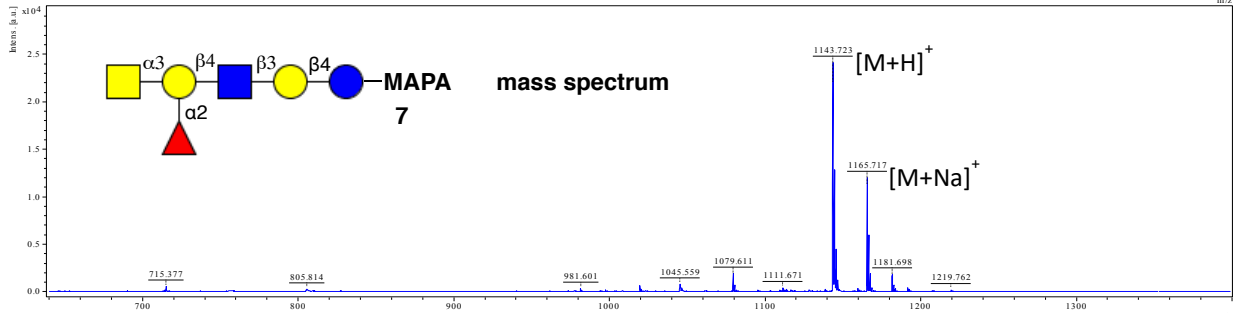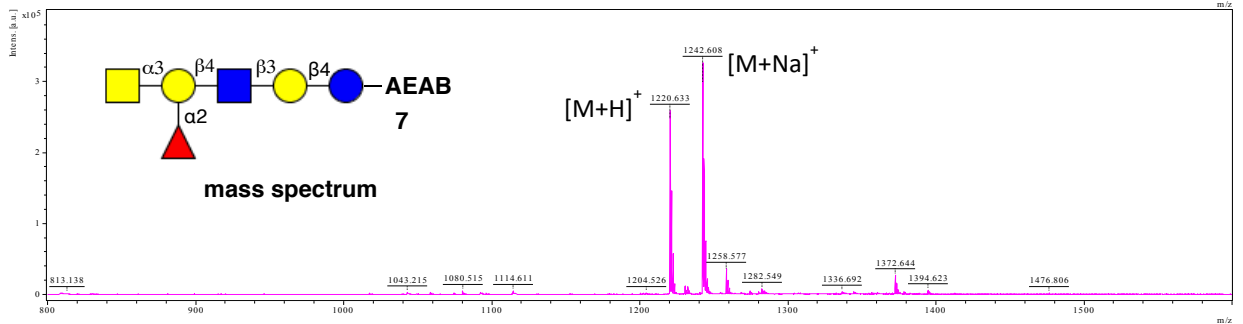

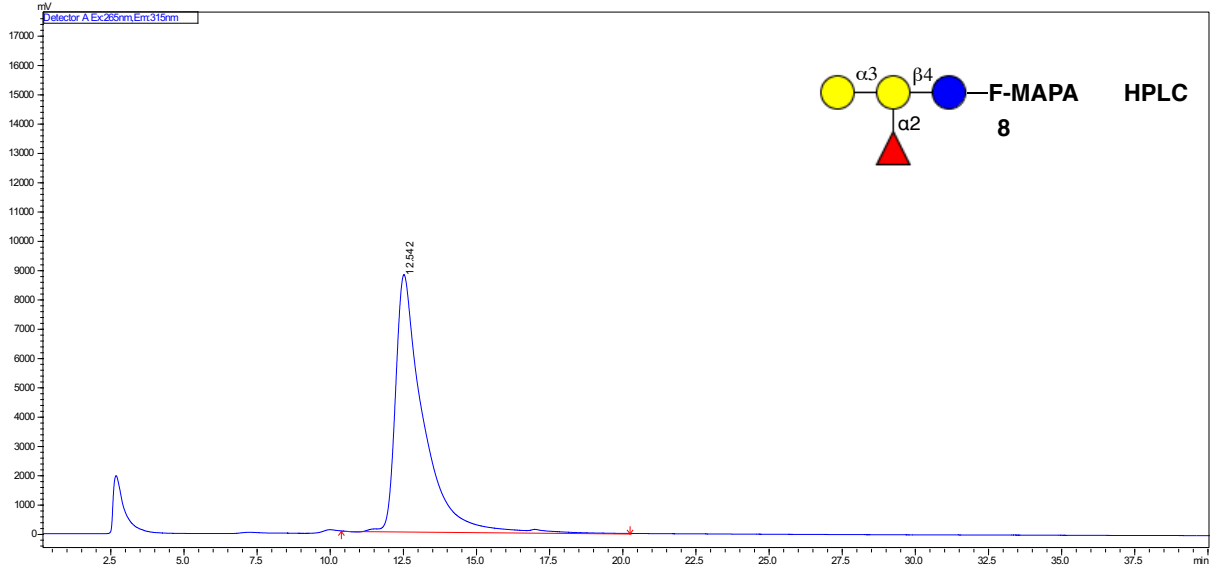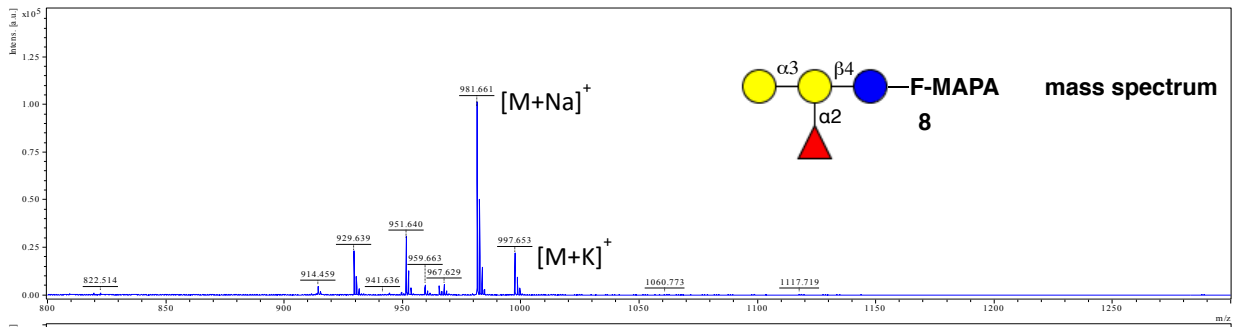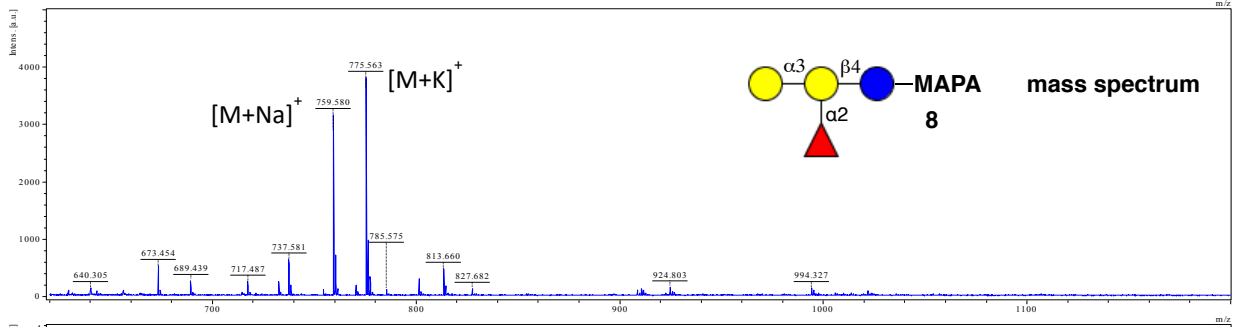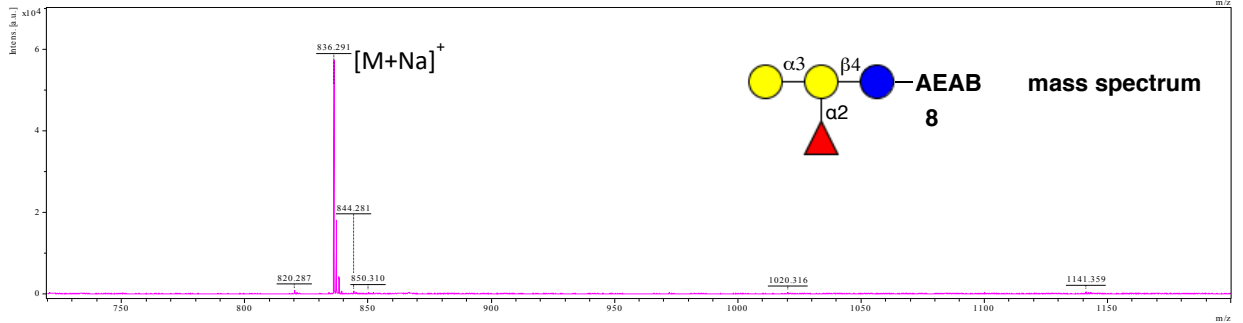

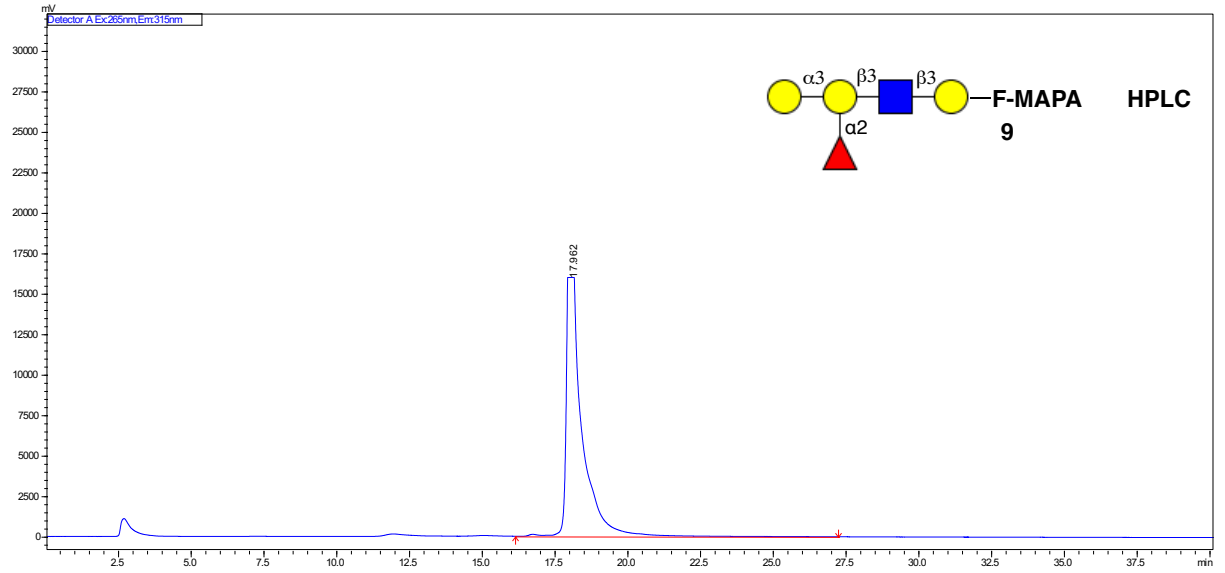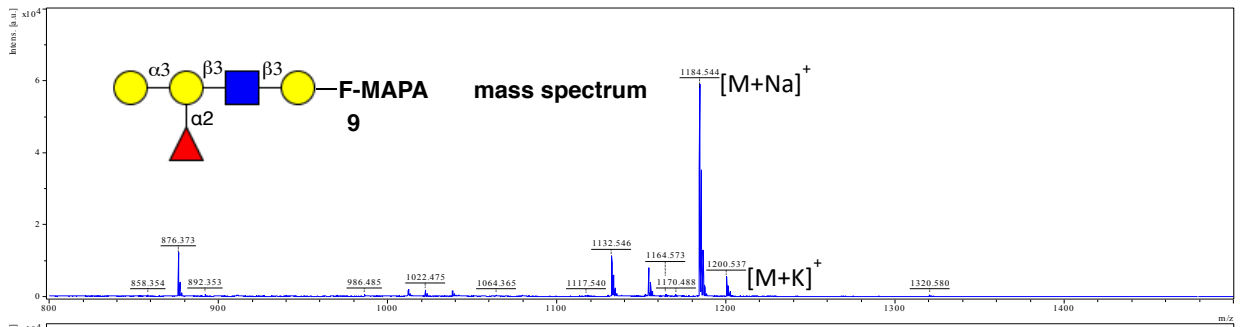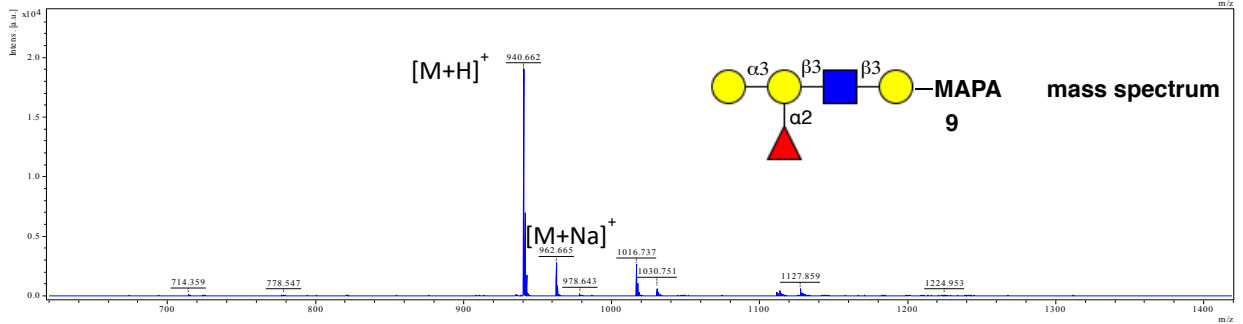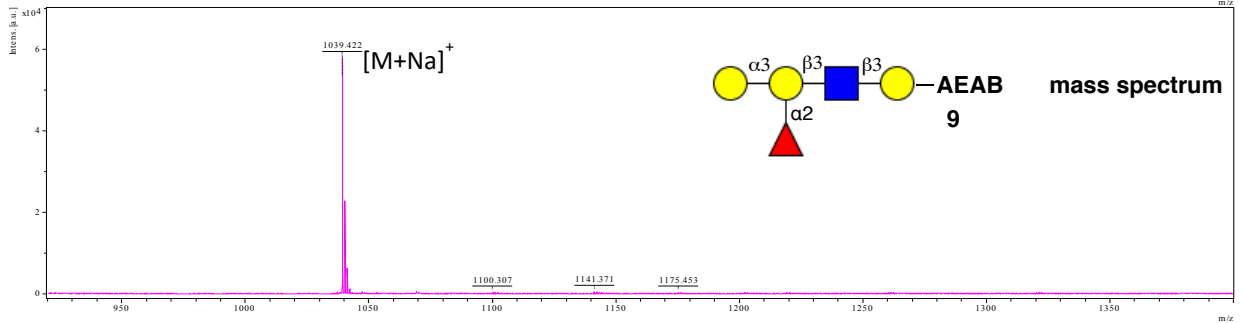

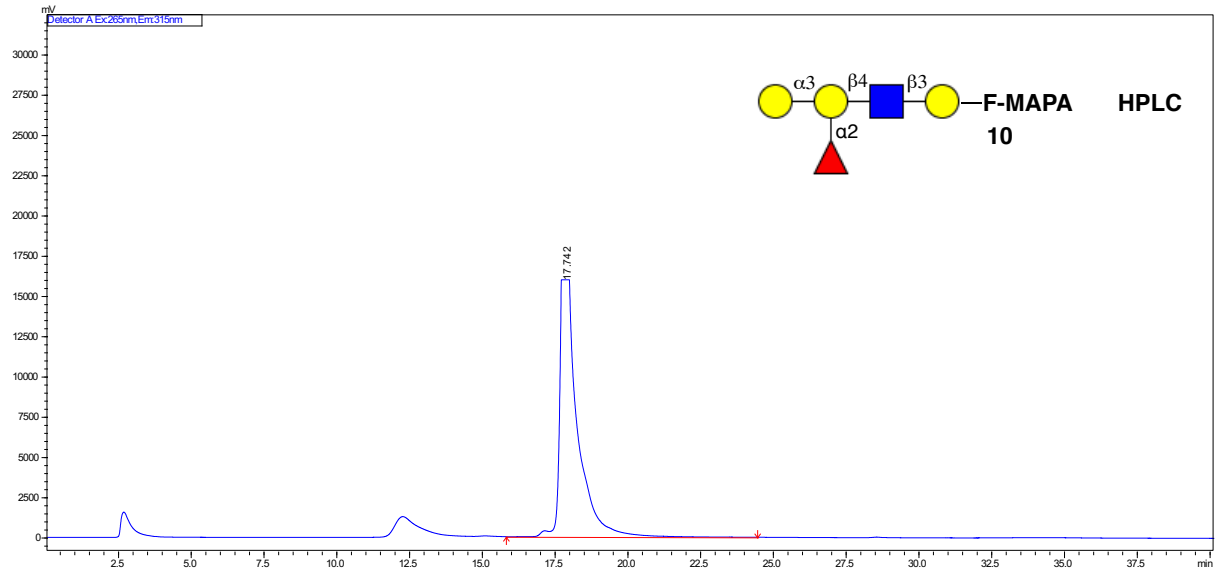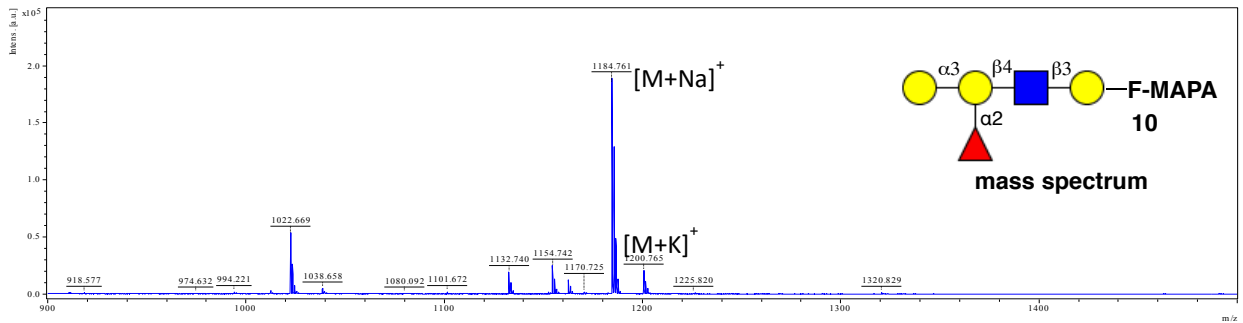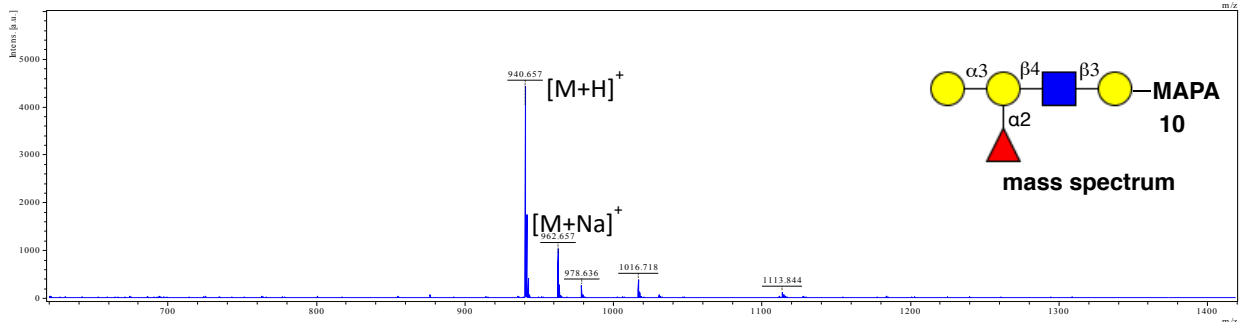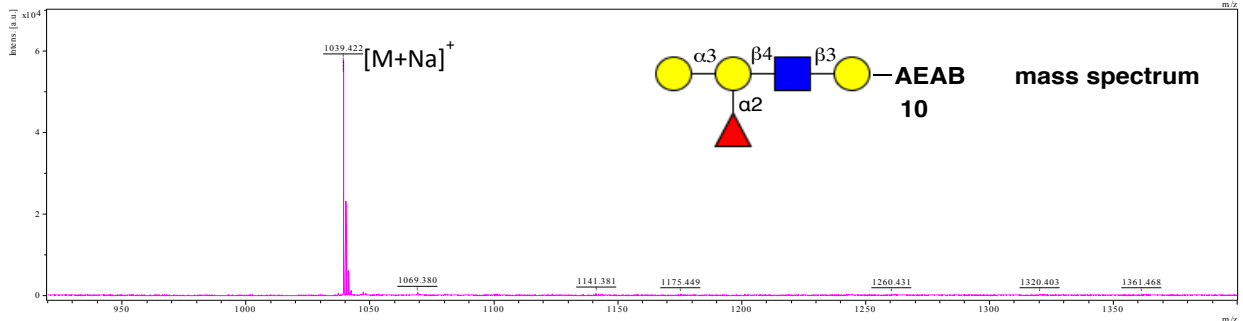

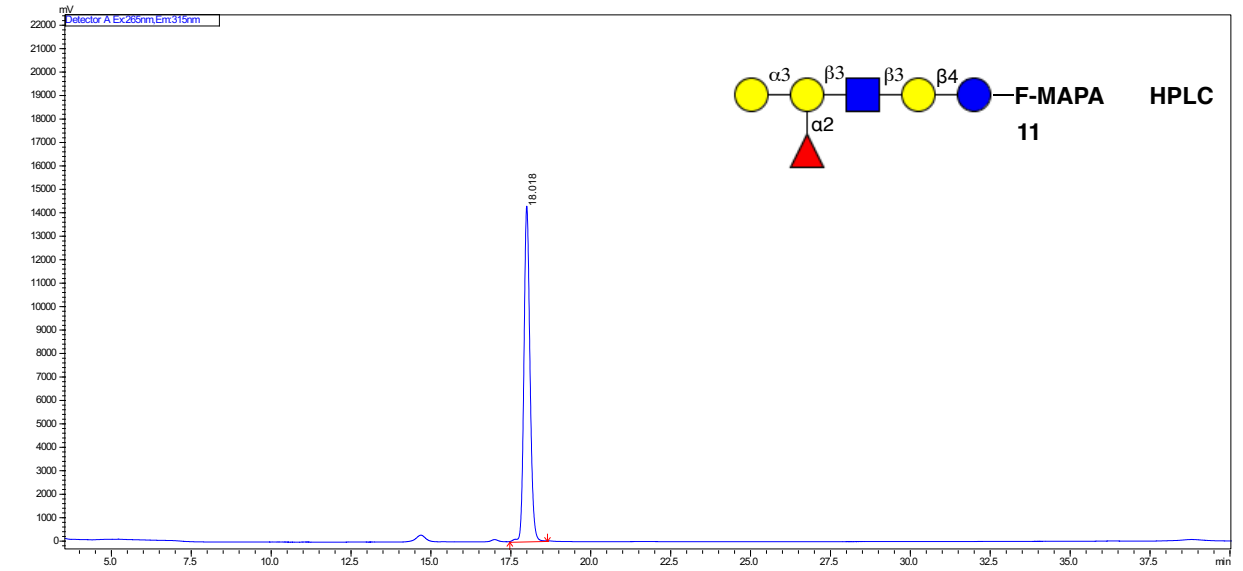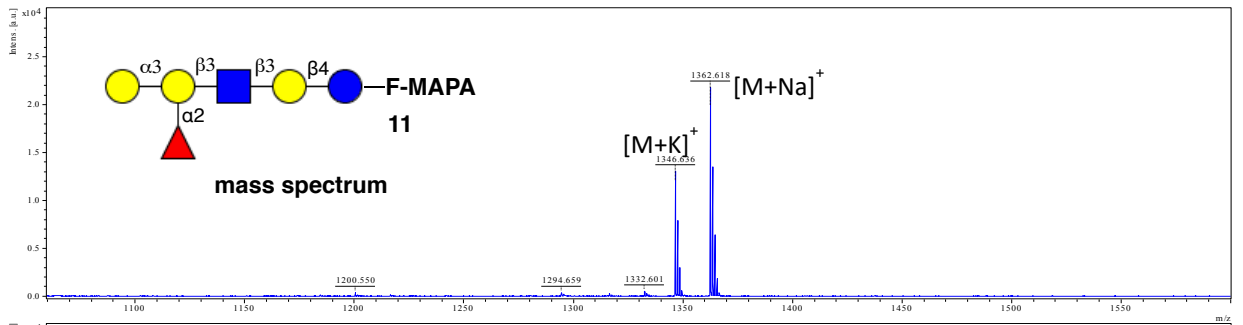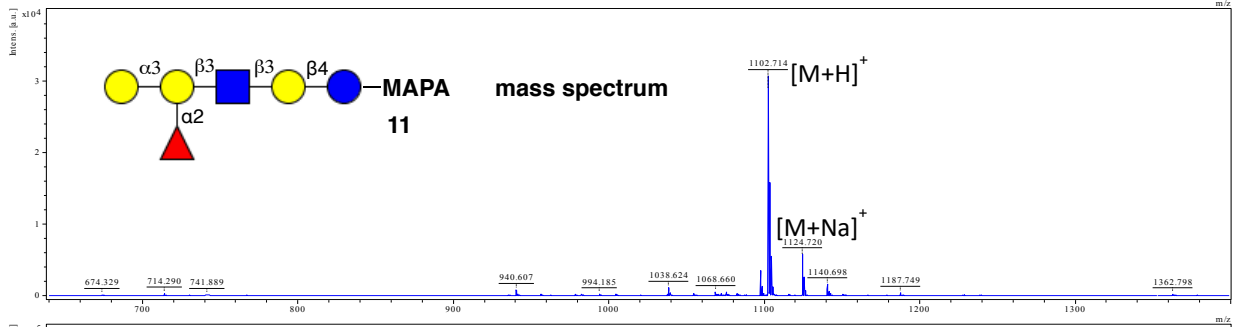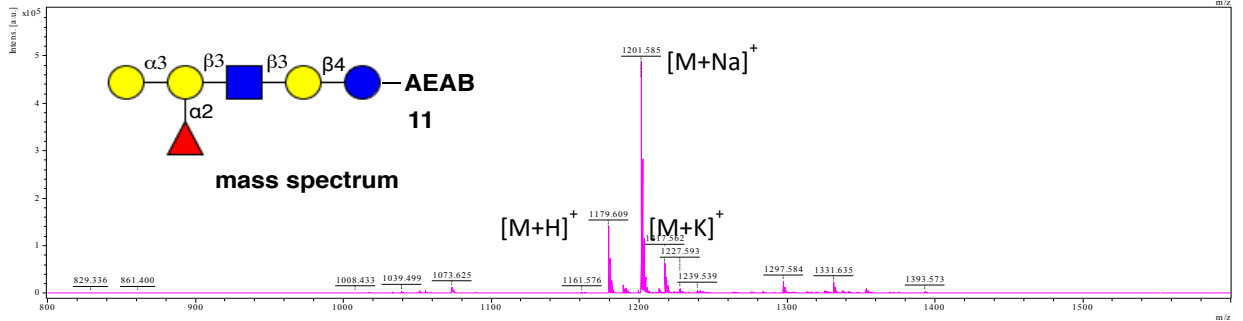

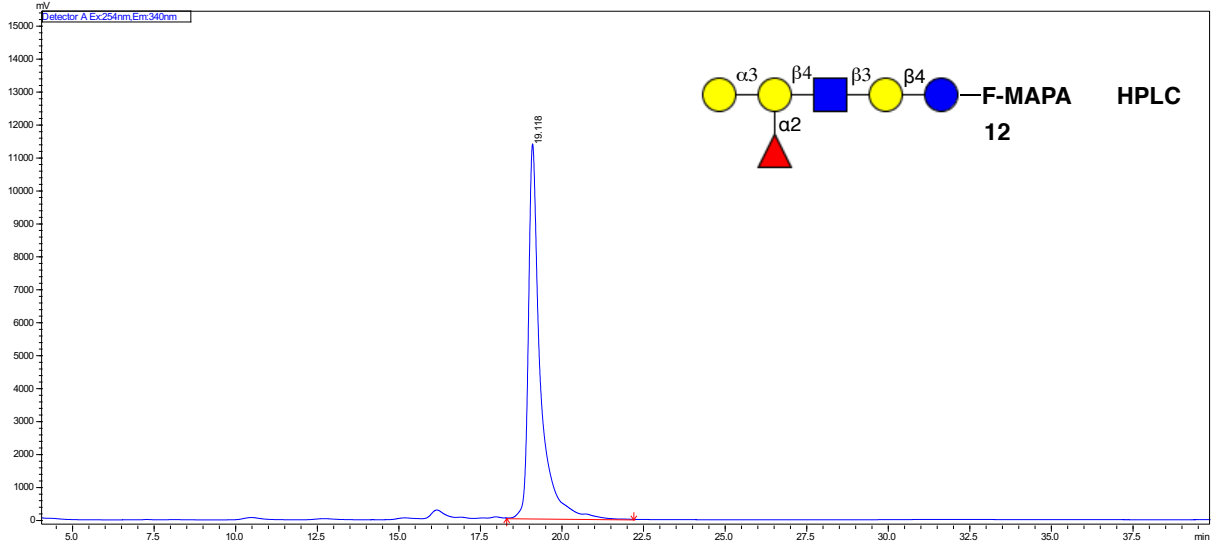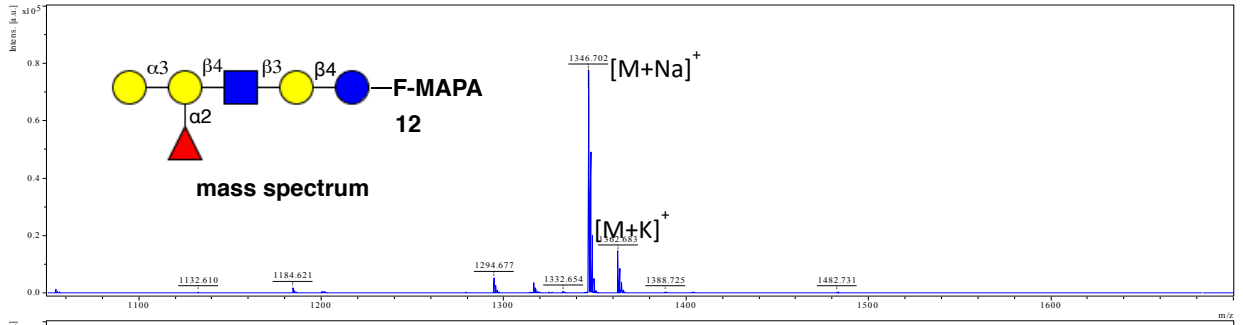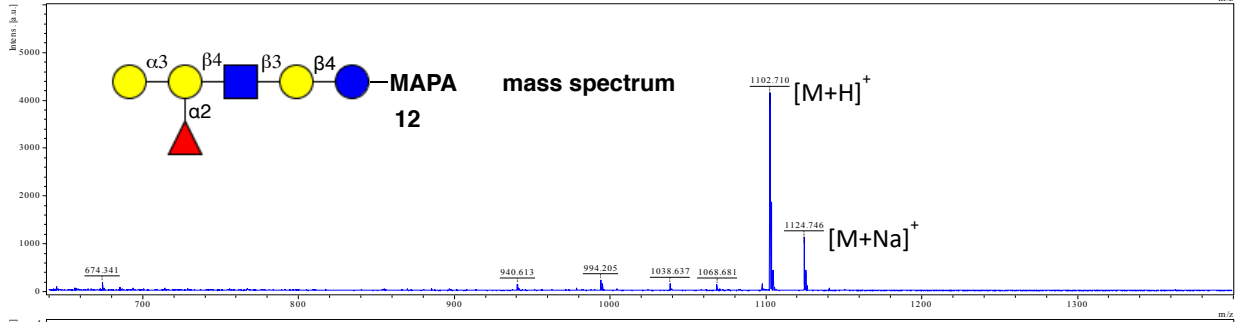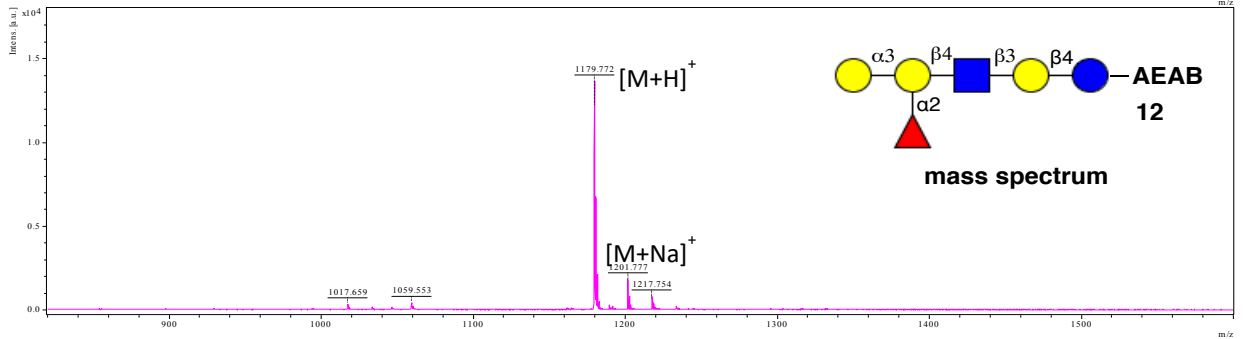



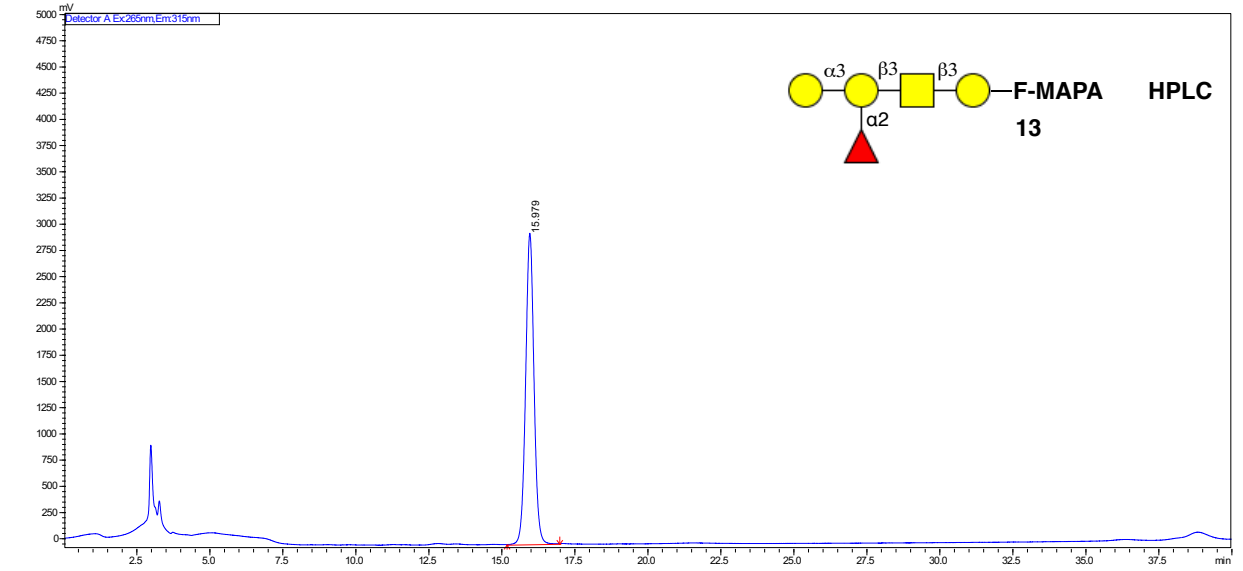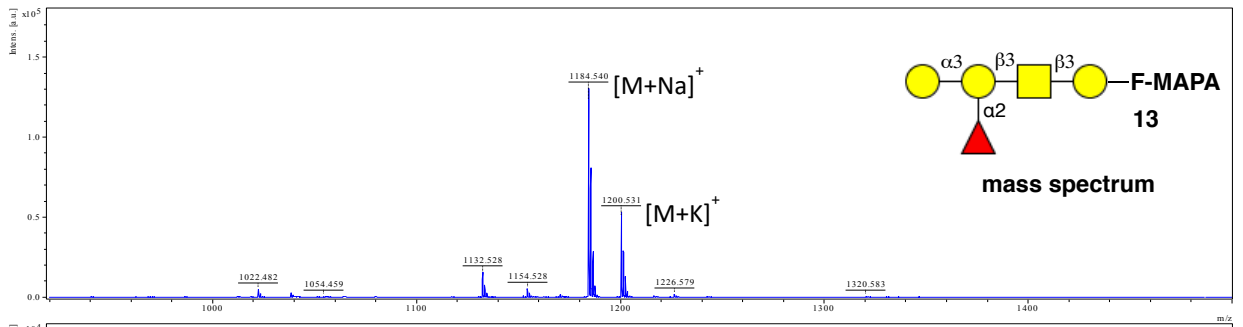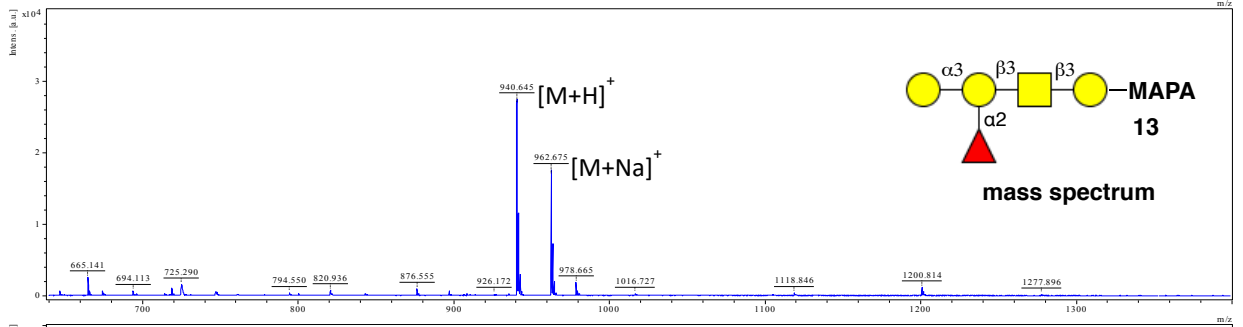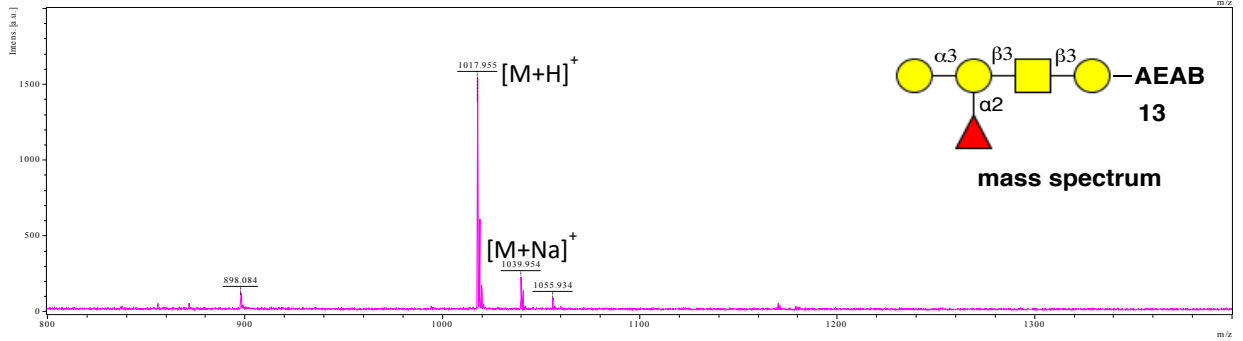

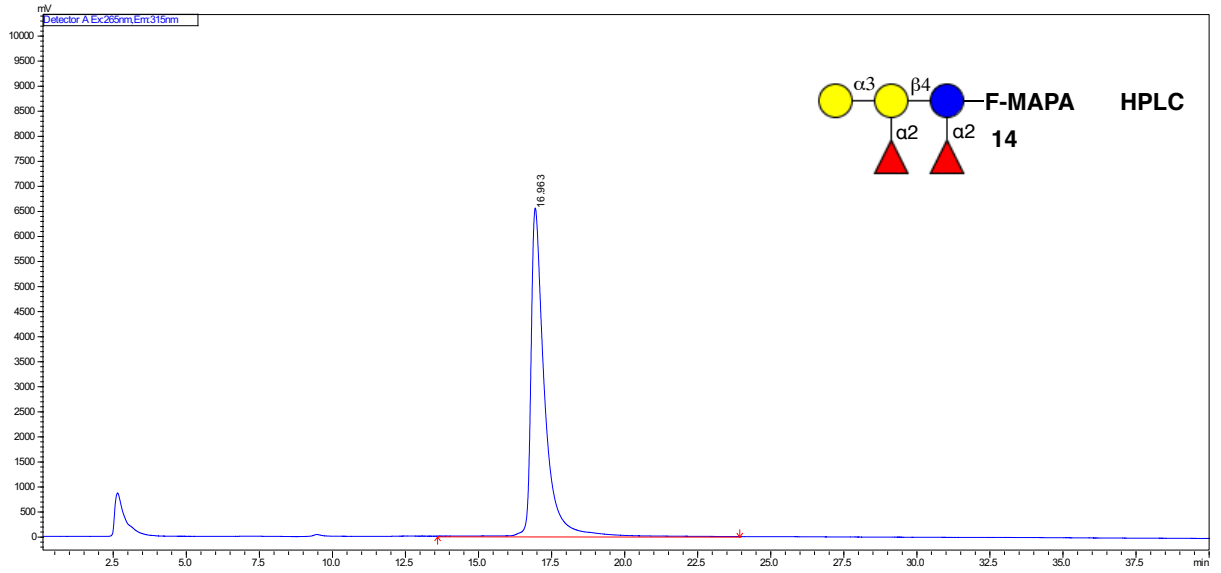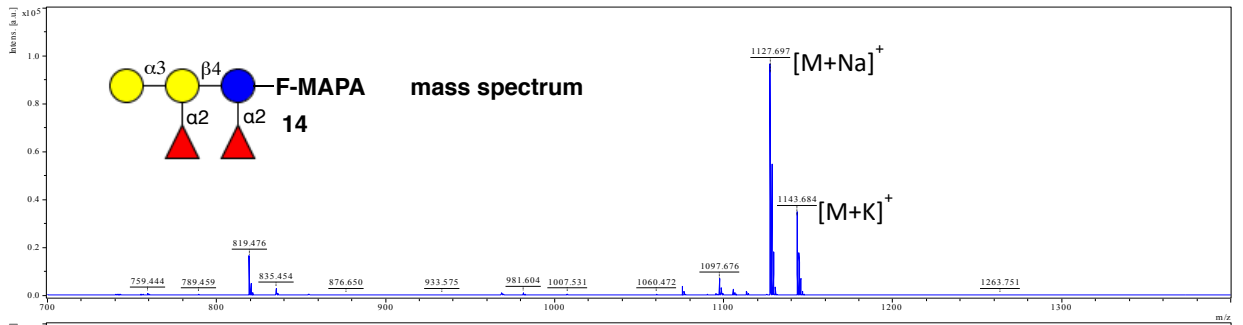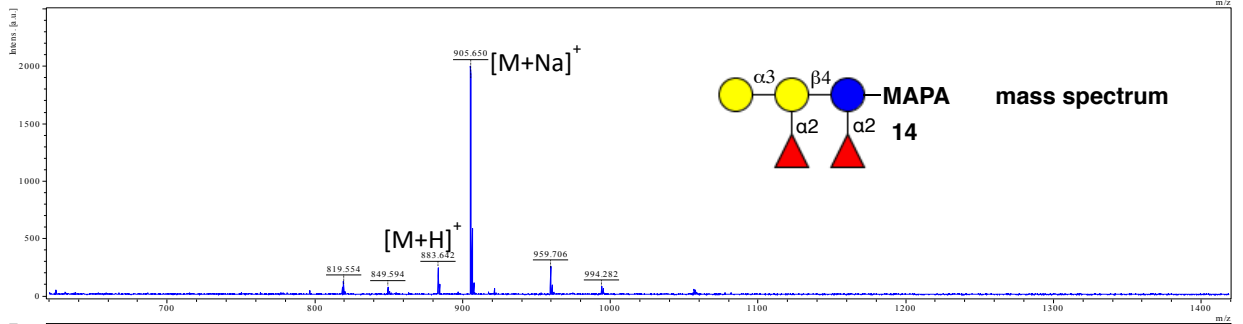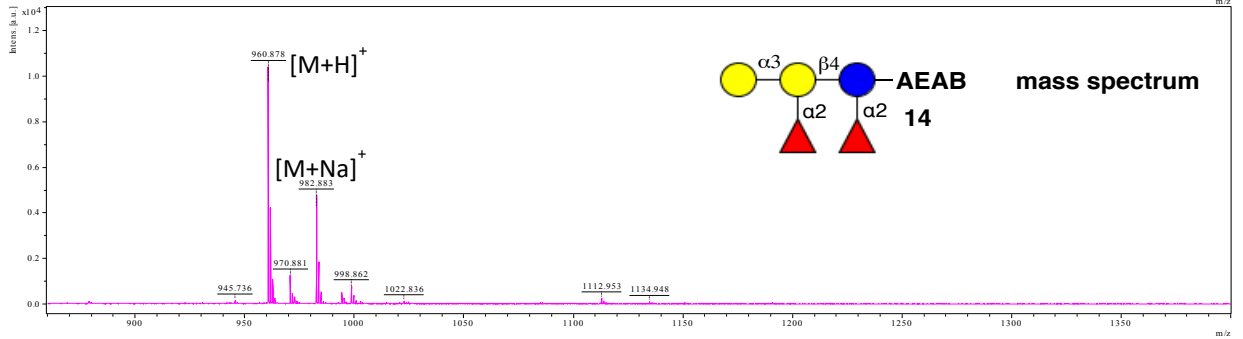

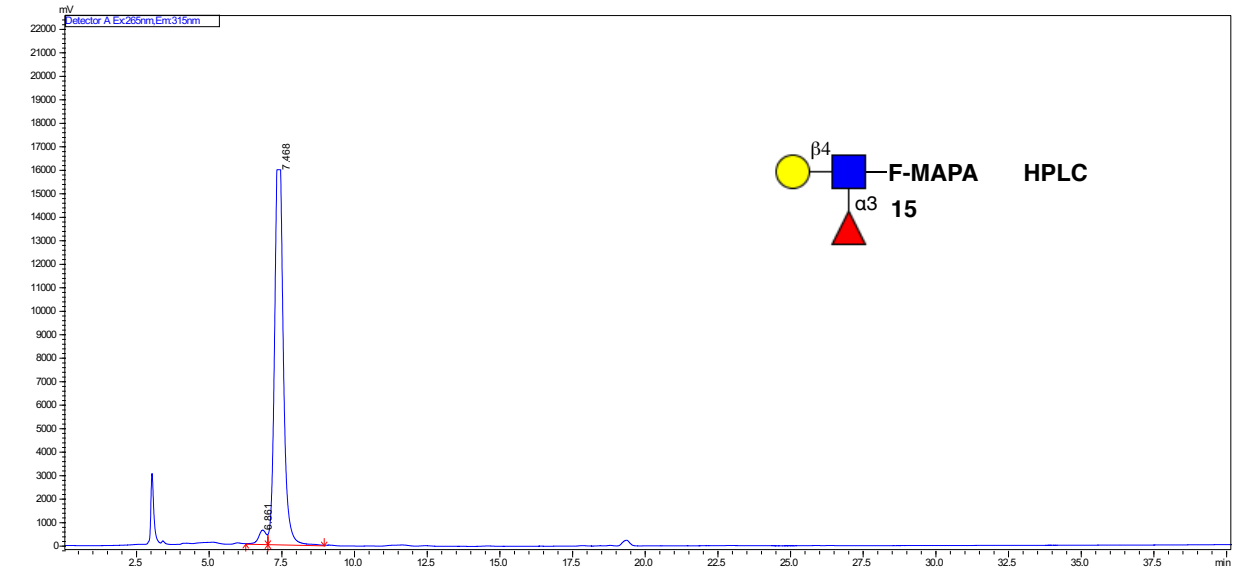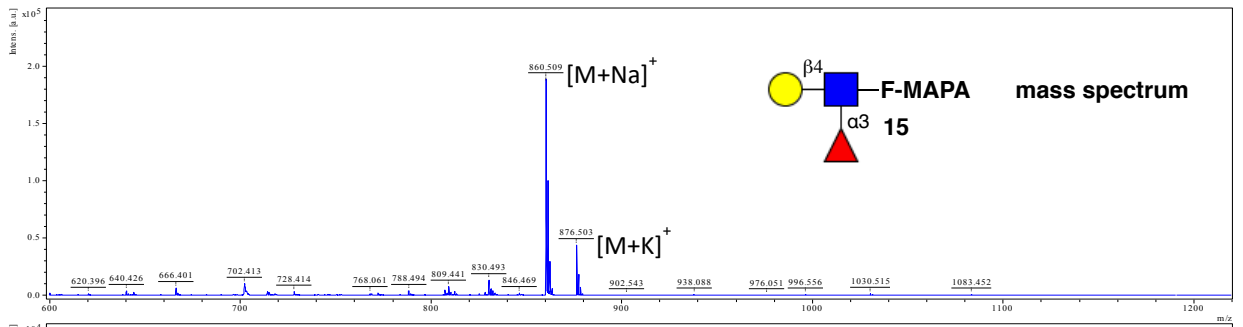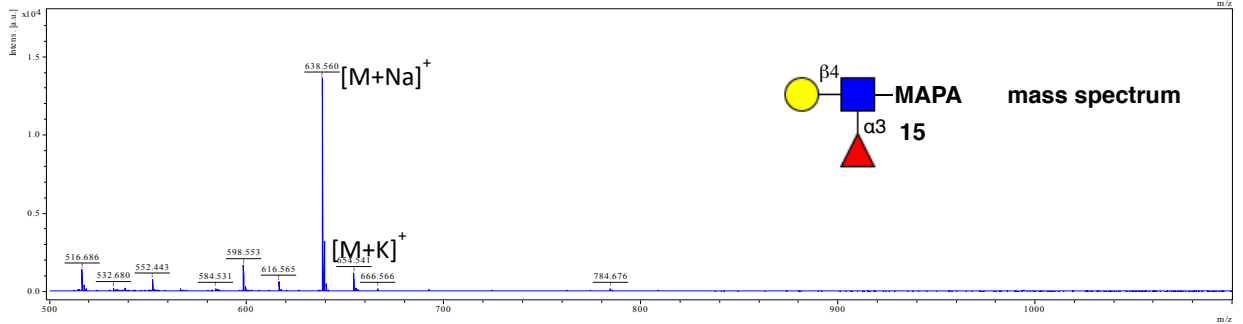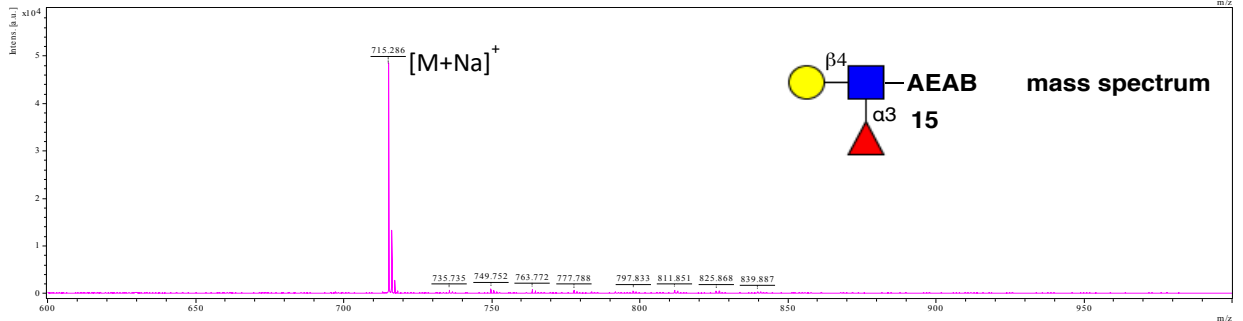

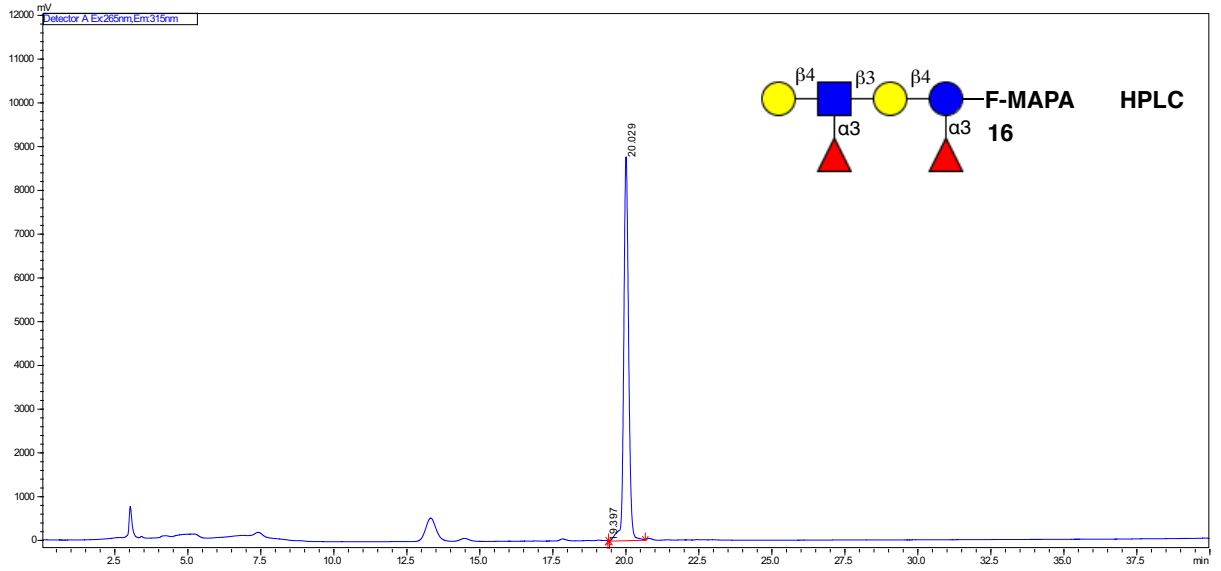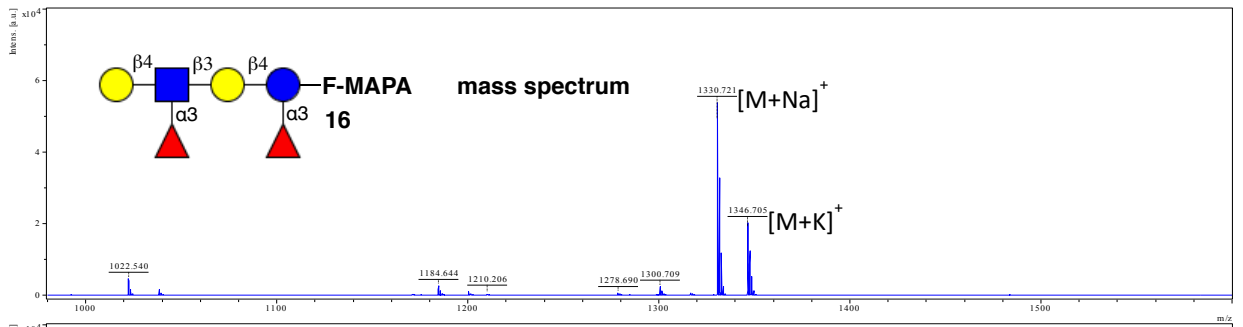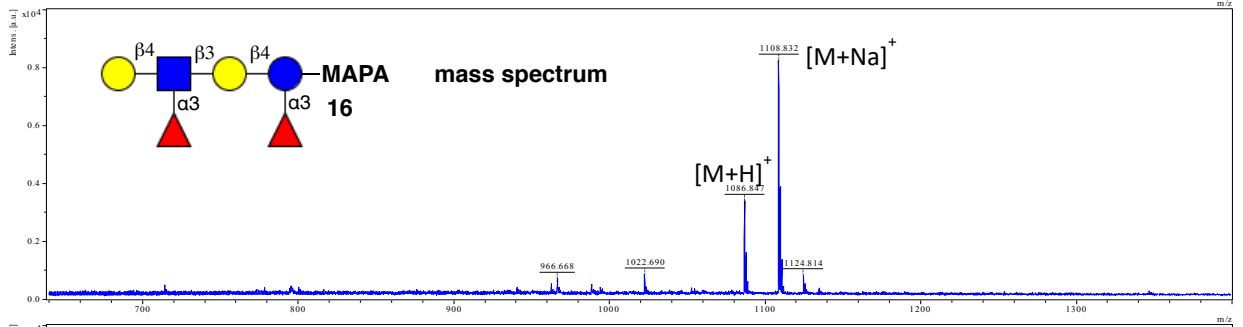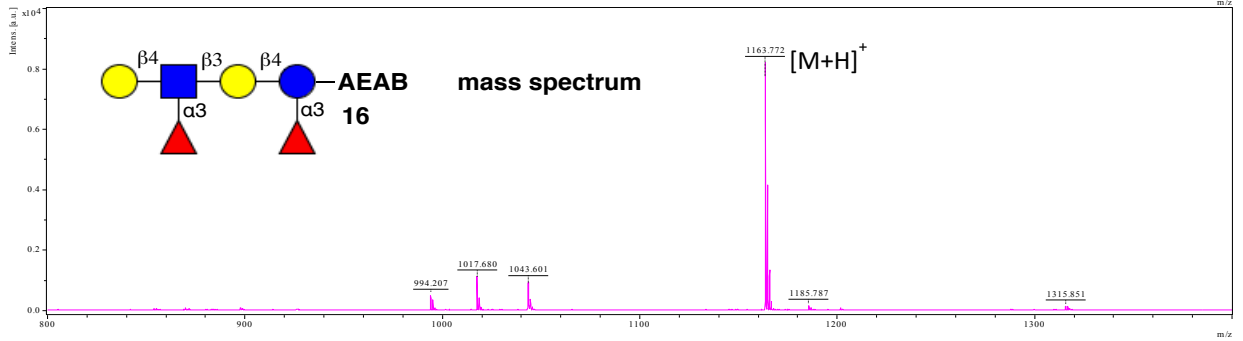

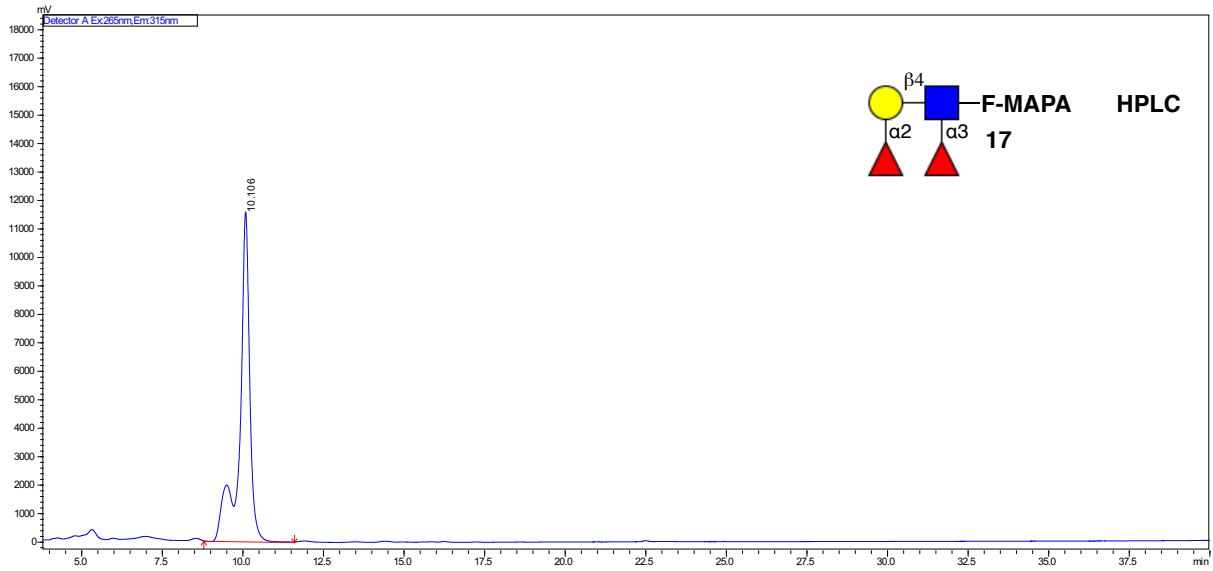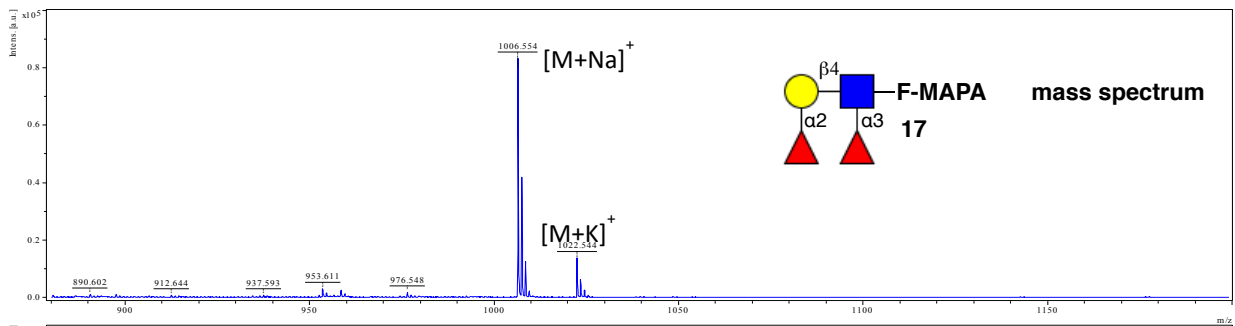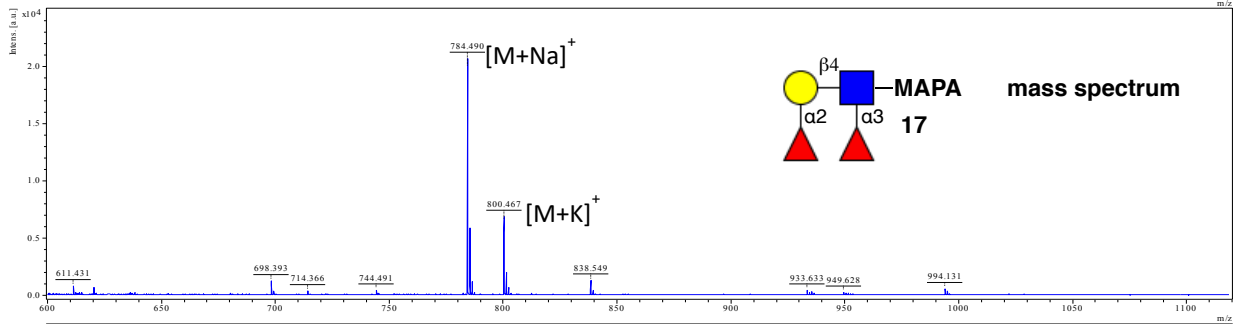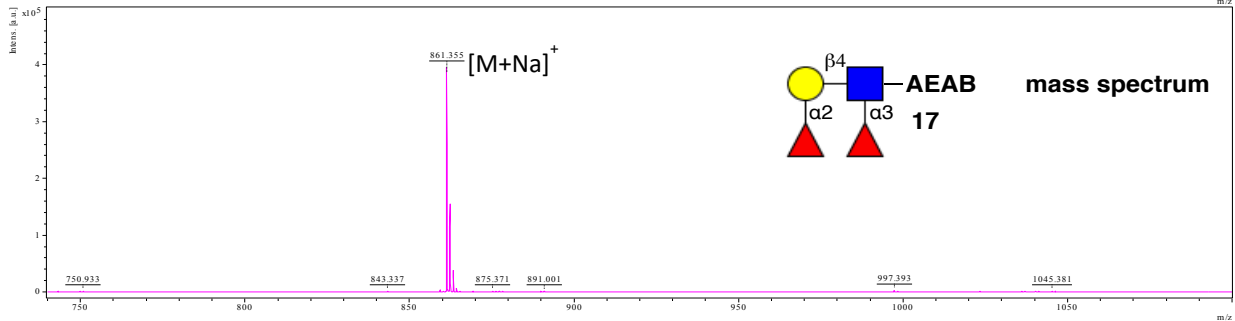

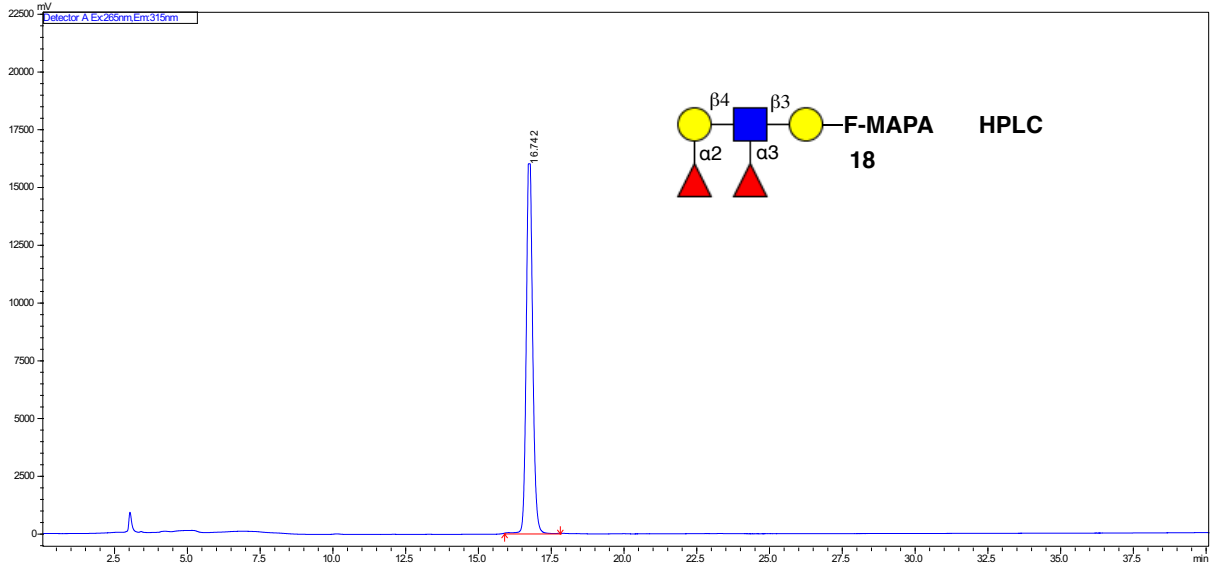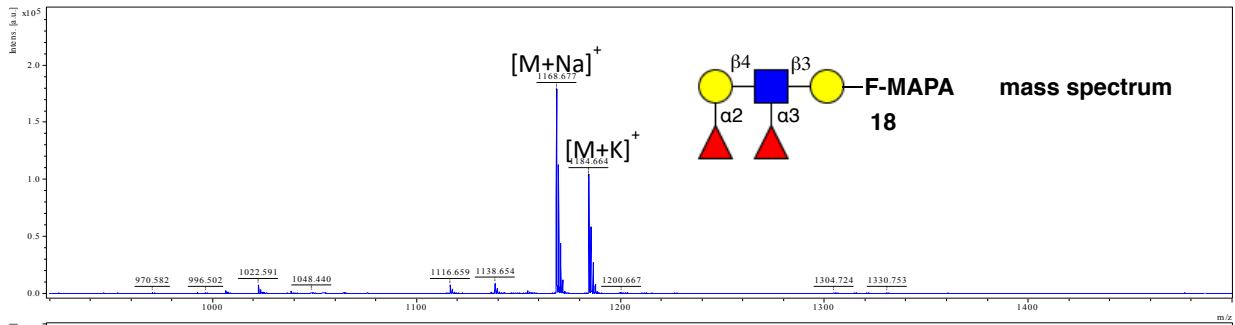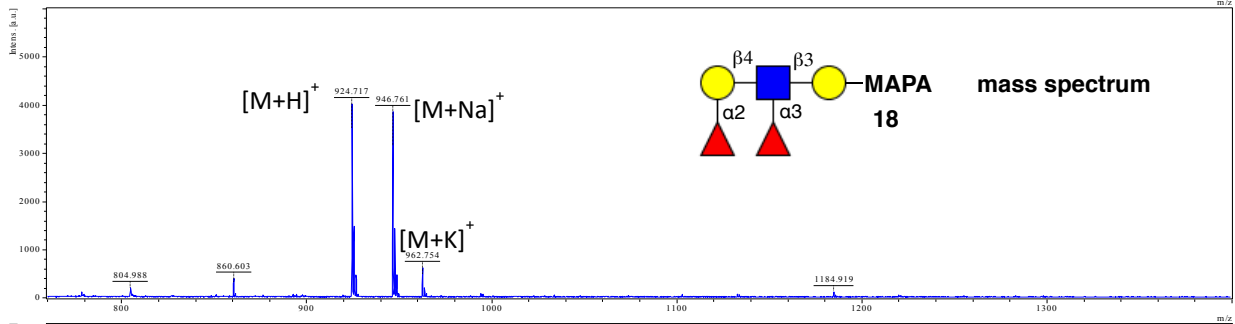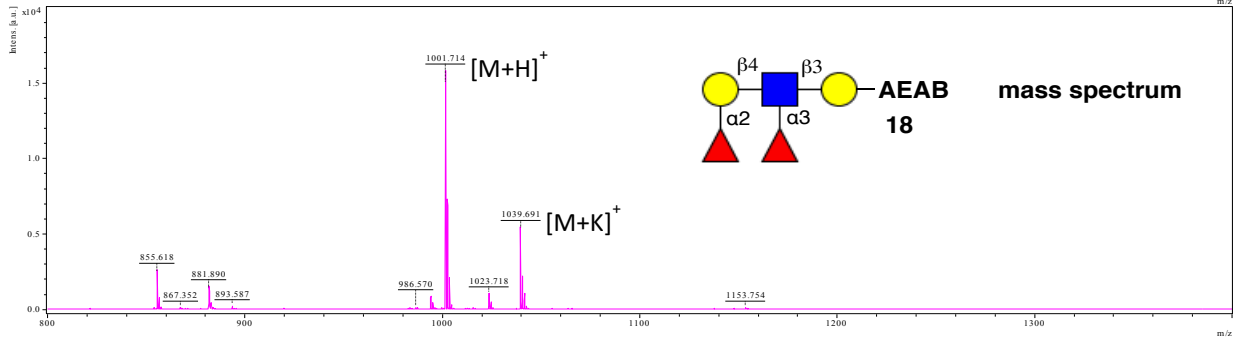

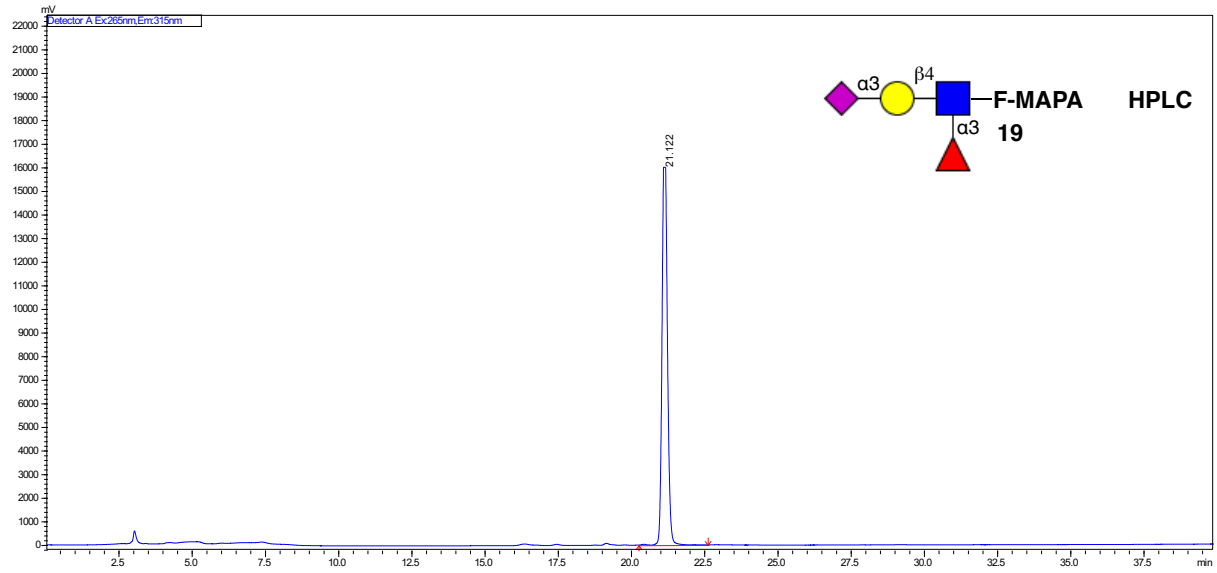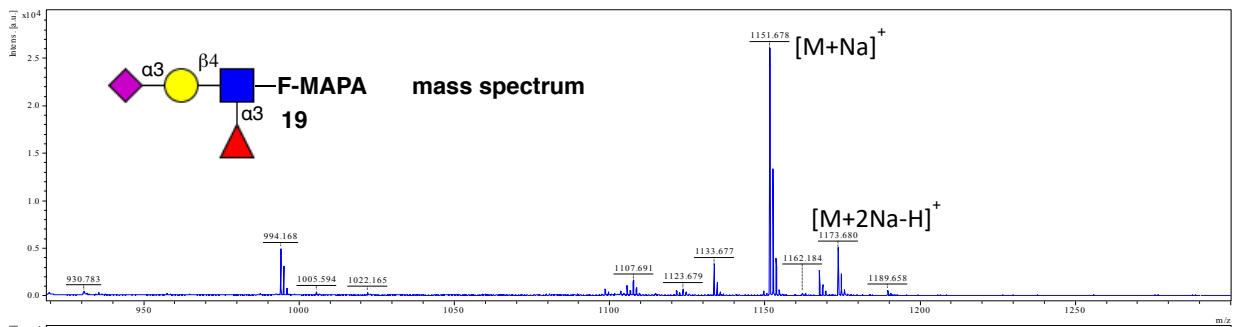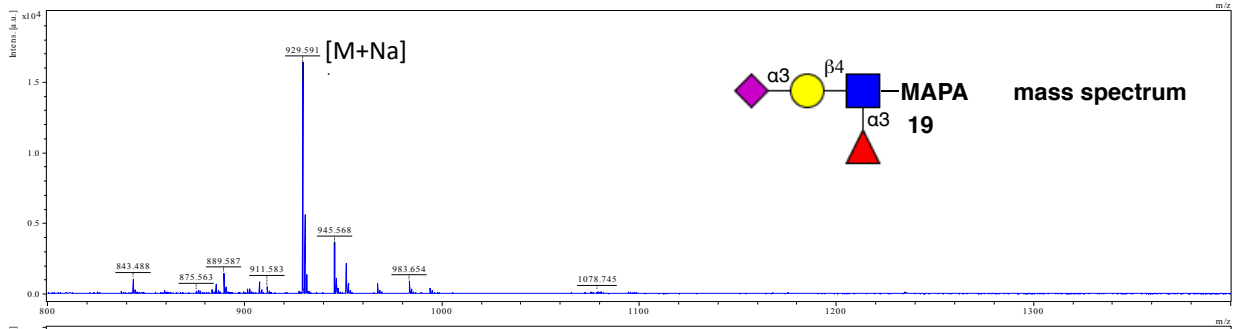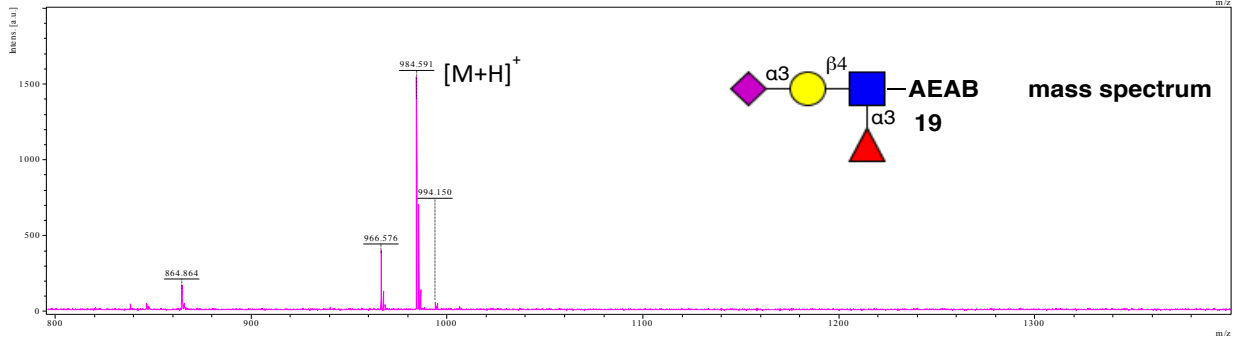

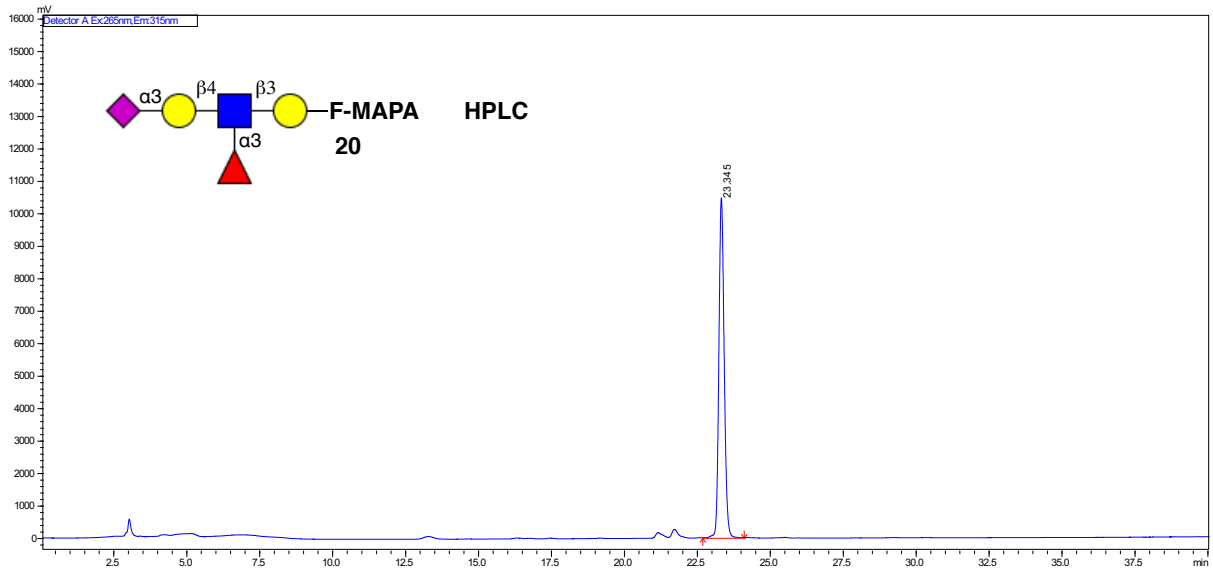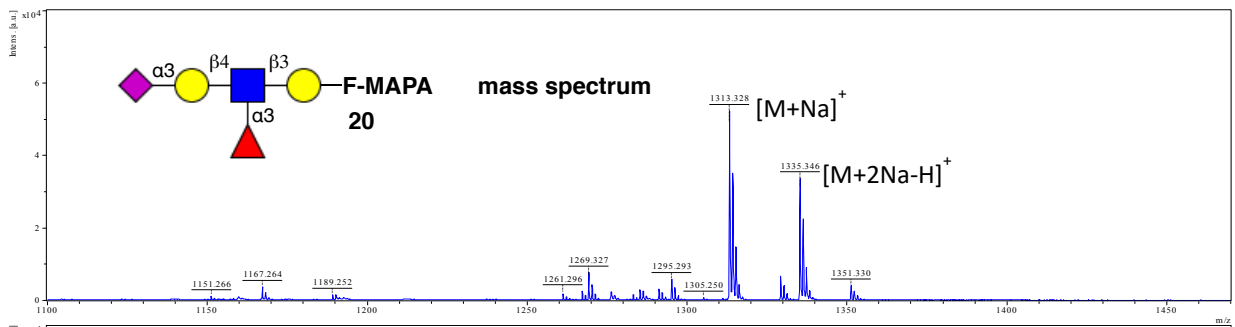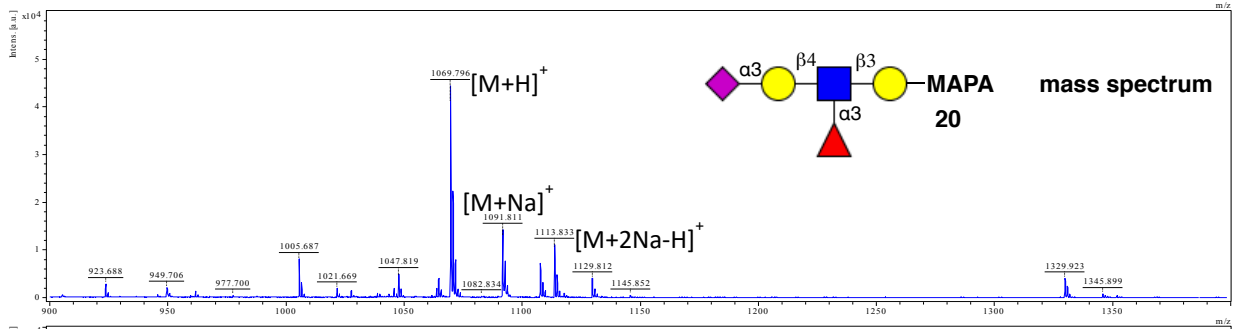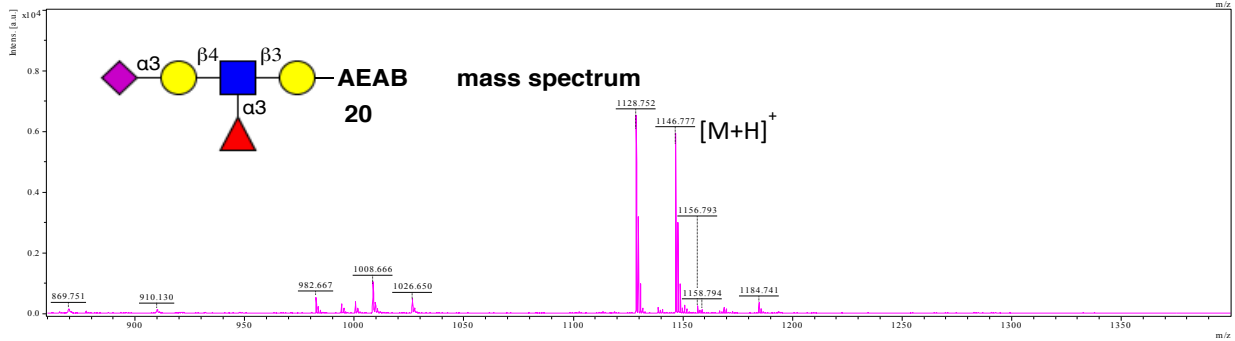



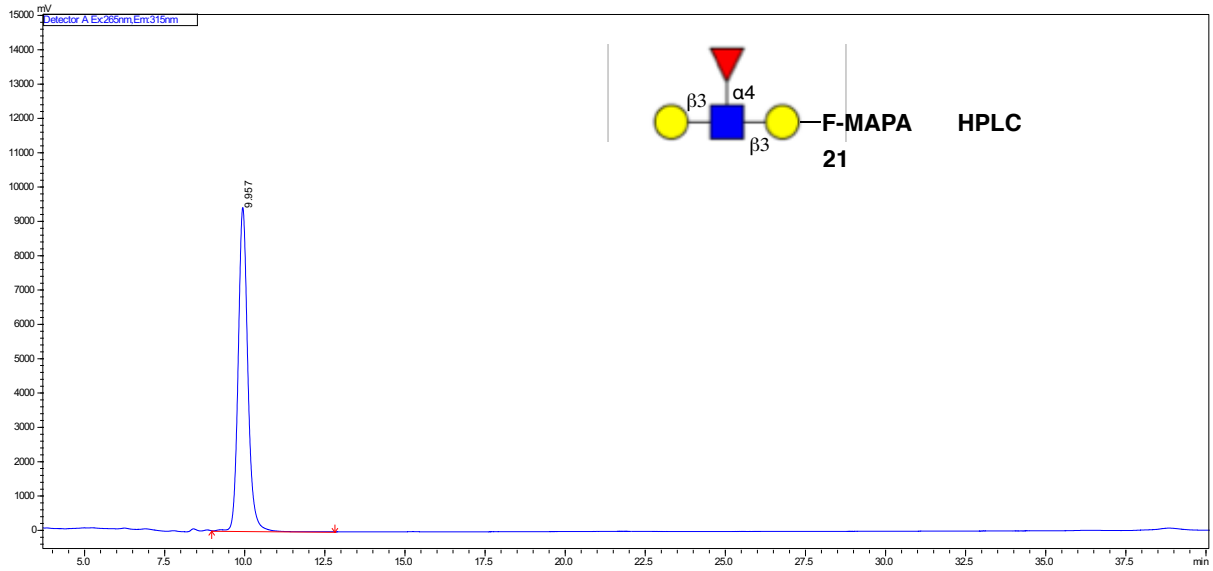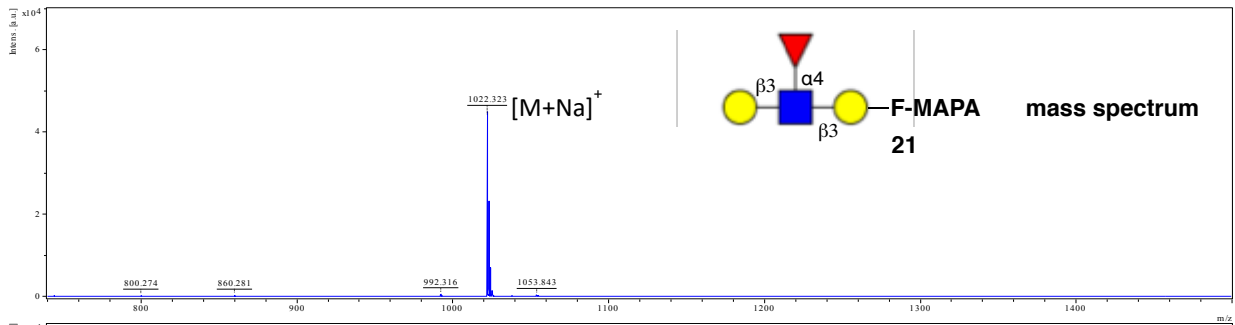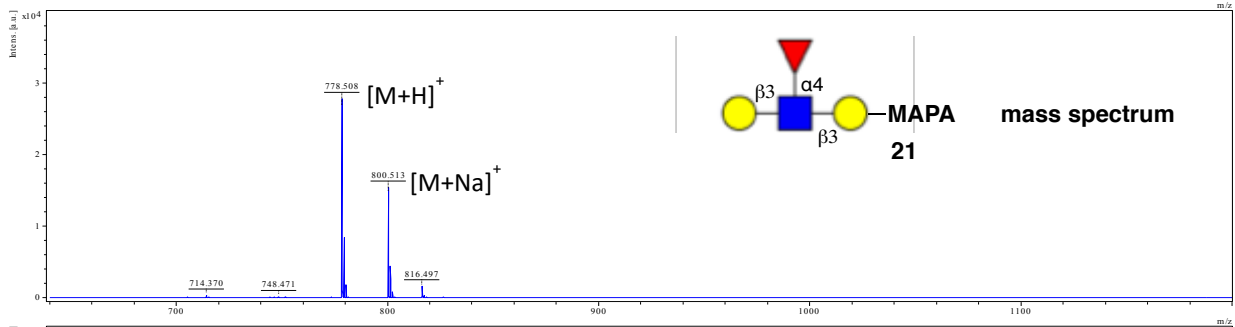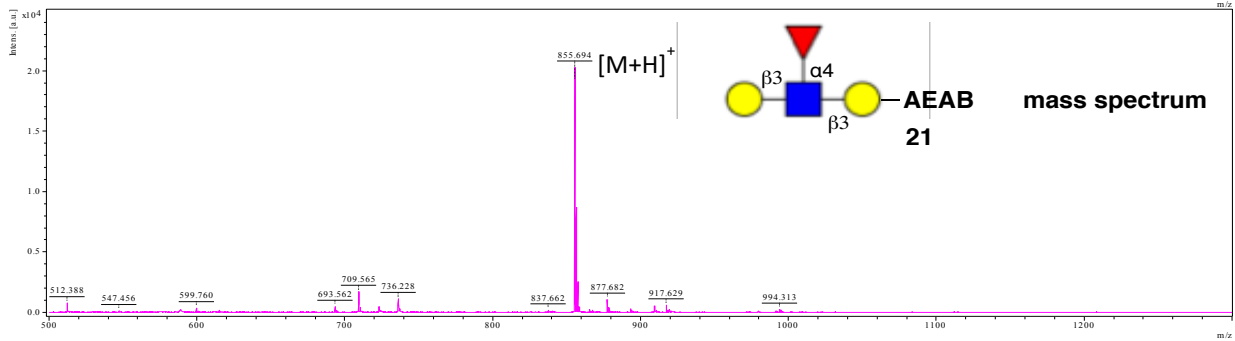

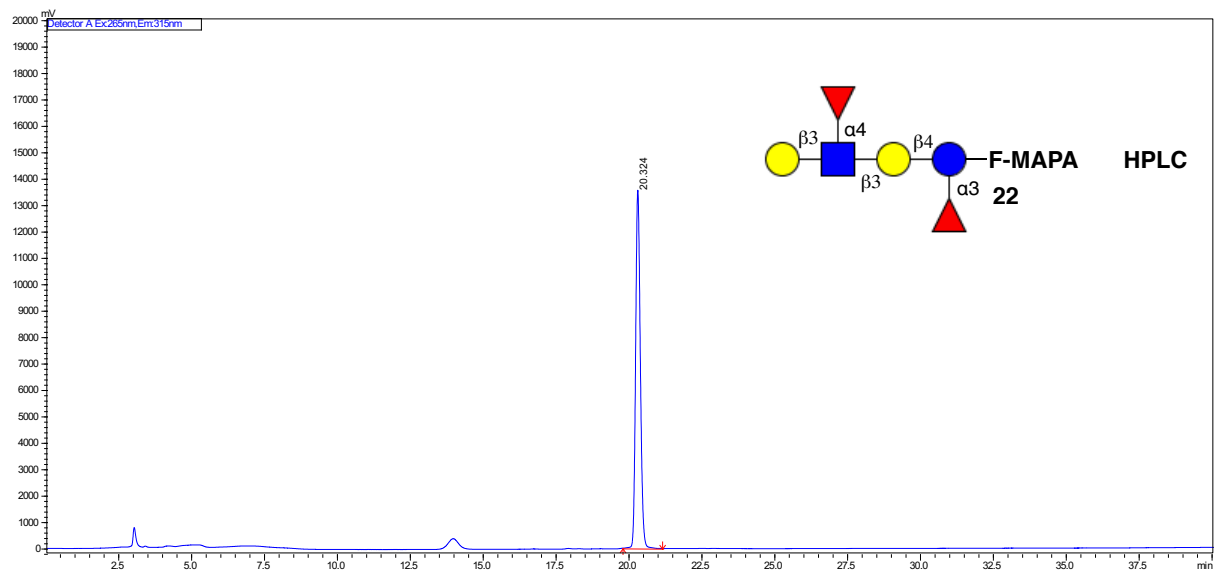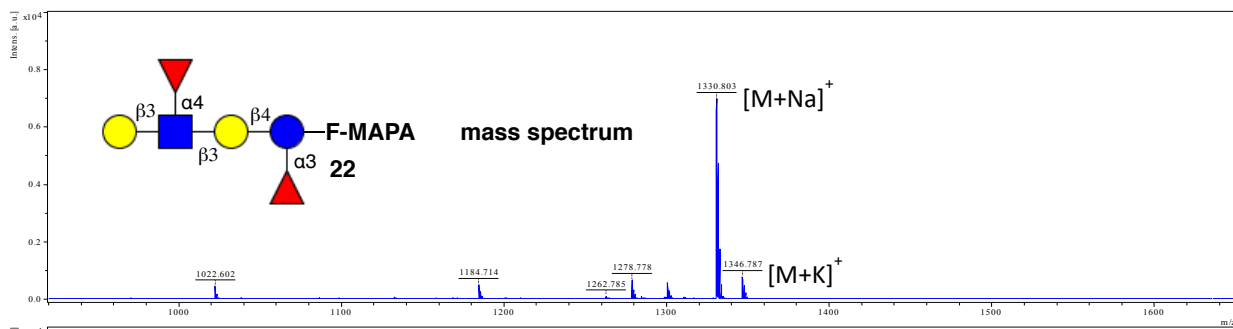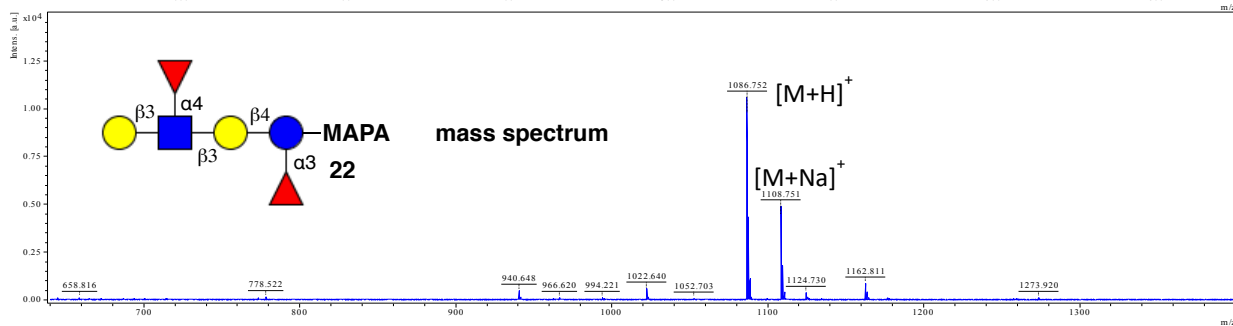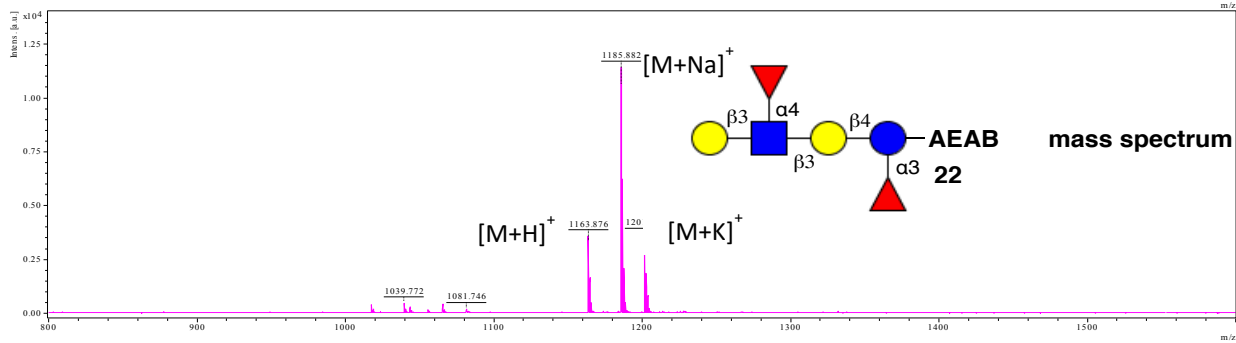

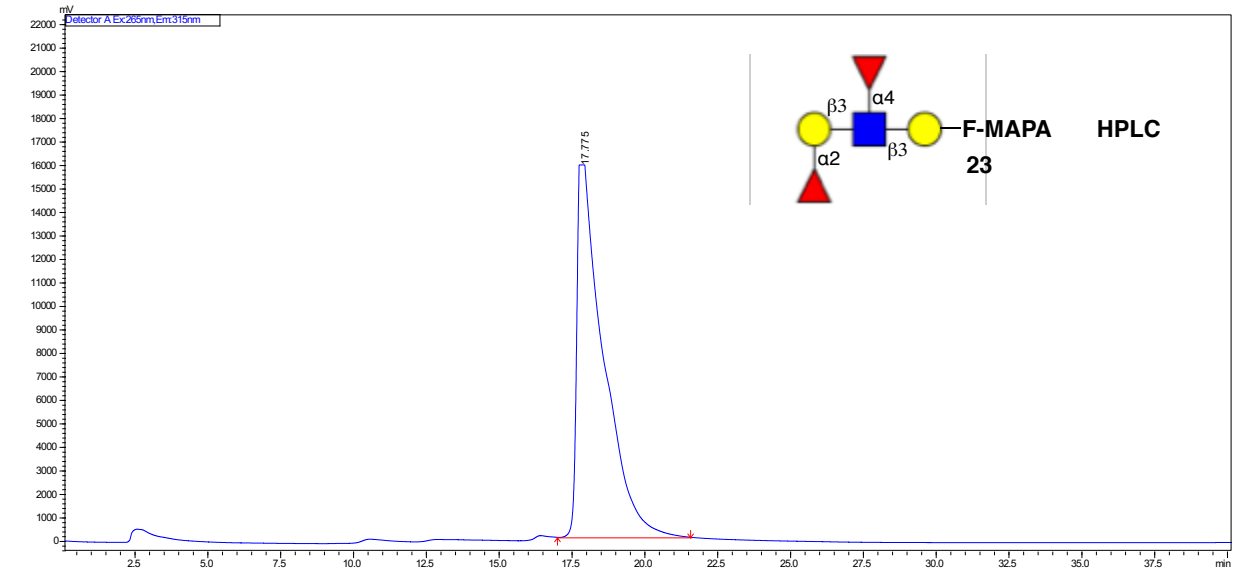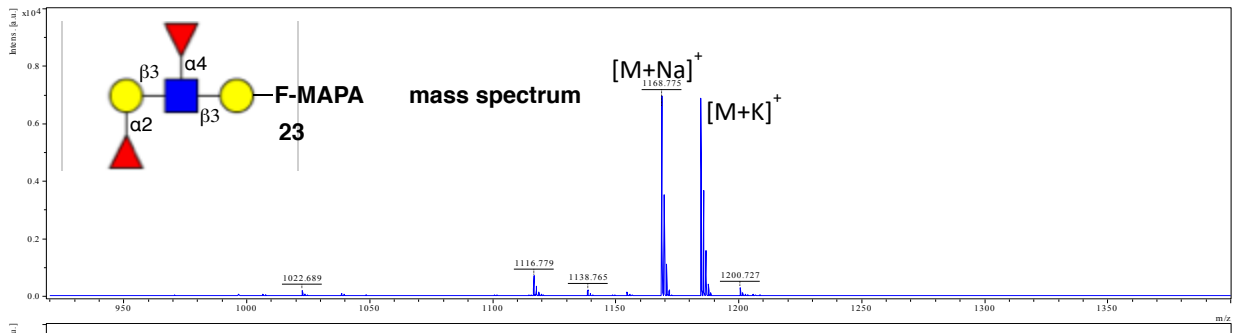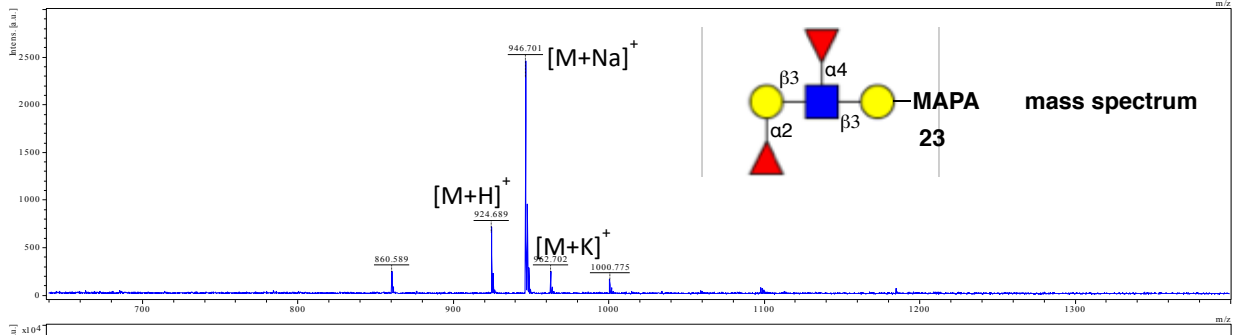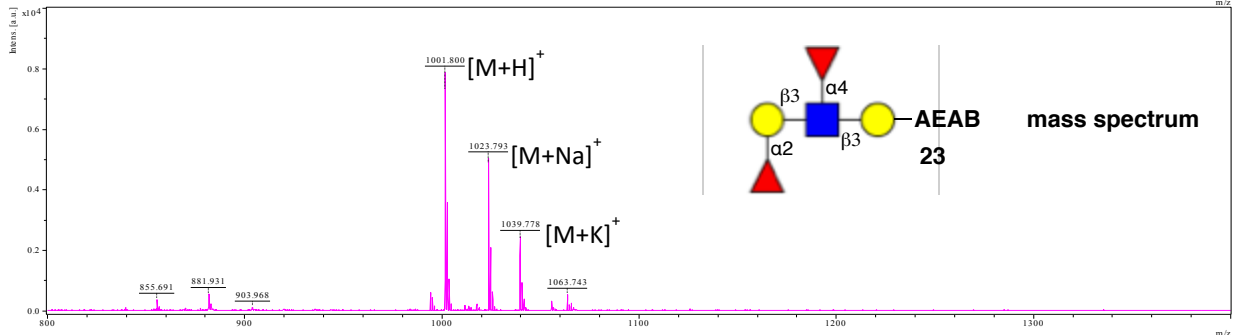

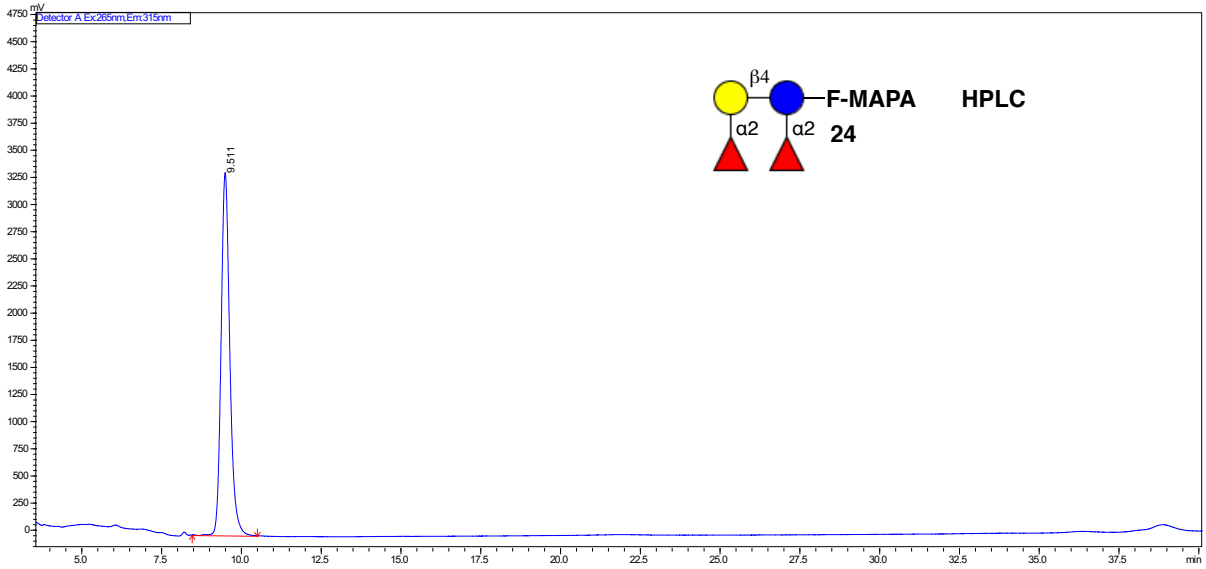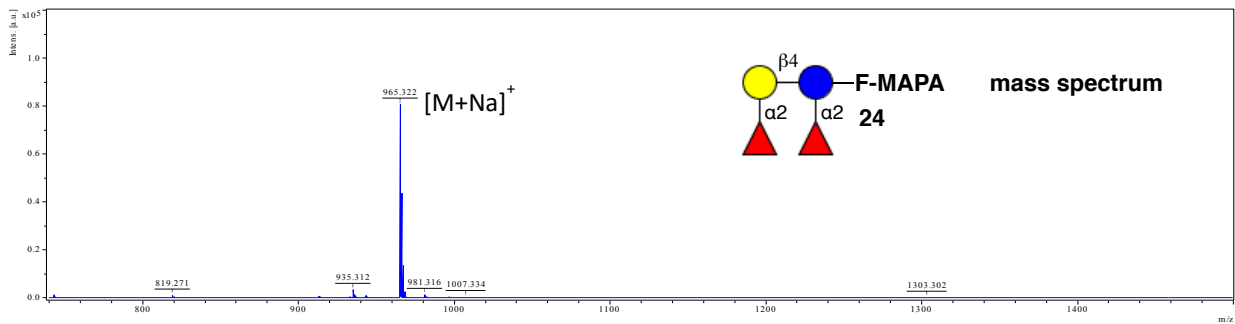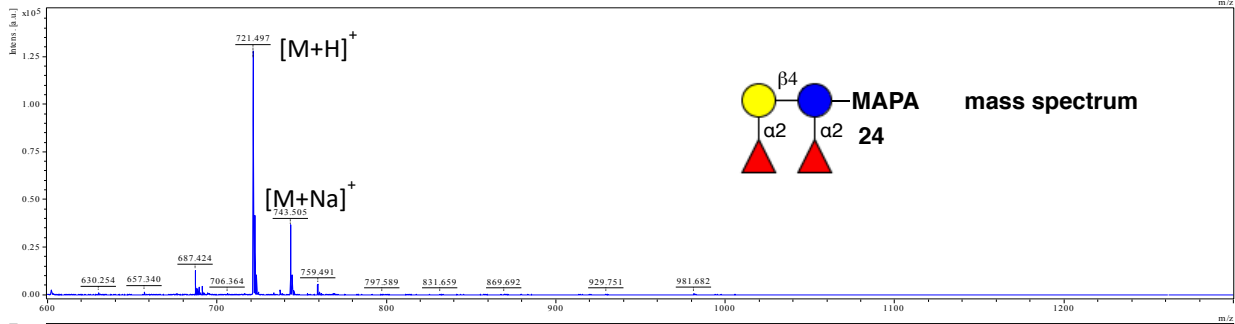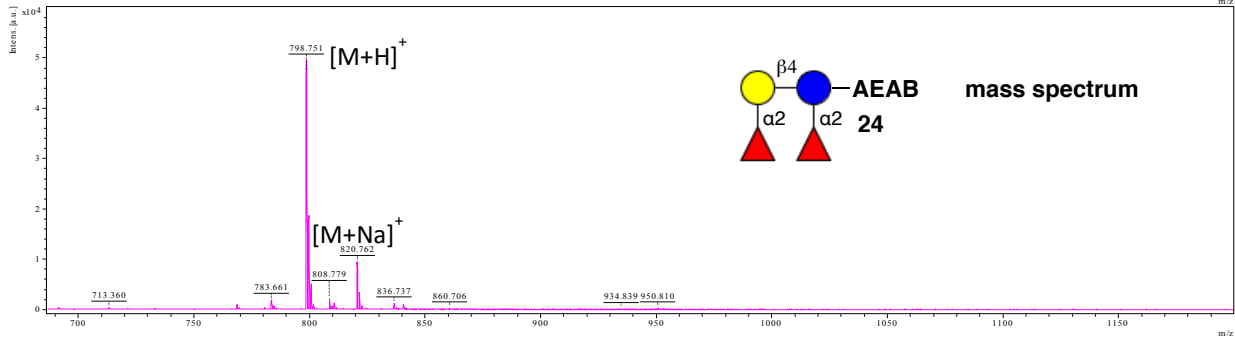

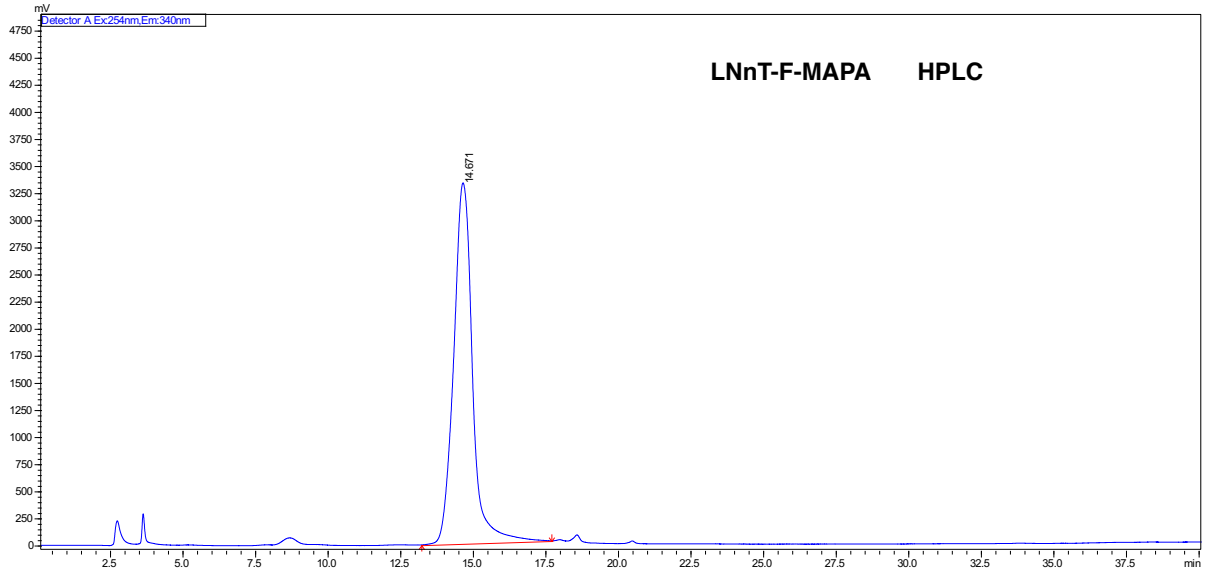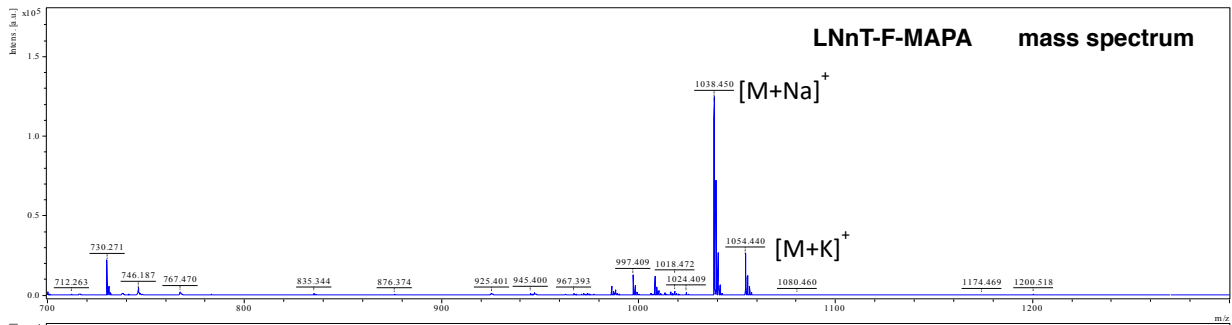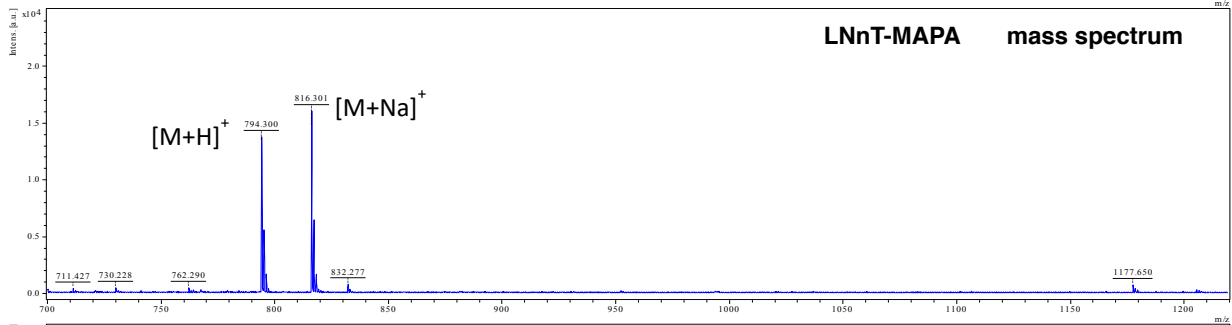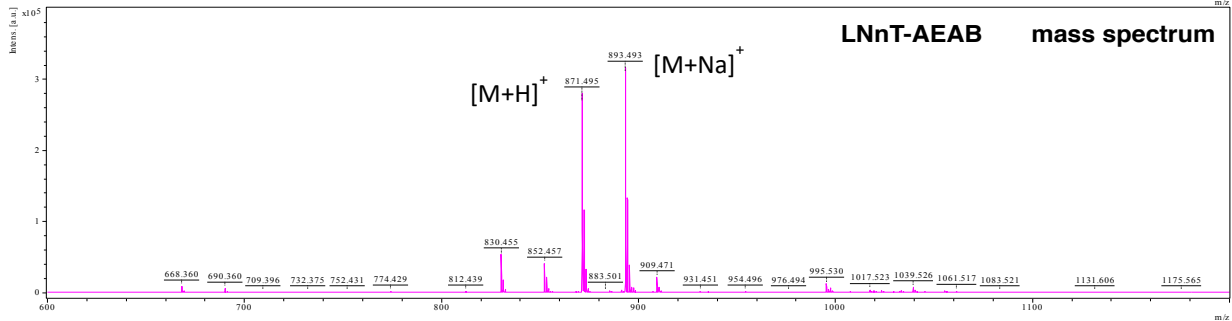

The original binding signals (RFUs) elicited with lectins.

| Probe ID | Glycan structure                                    | Blood type | AAL         |         | UEA-I       |         | GSL-I b4    |         | DBA         |         |
|----------|-----------------------------------------------------|------------|-------------|---------|-------------|---------|-------------|---------|-------------|---------|
|          |                                                     |            | Average RFU | Std Dev |
| 1a       | Fuca1-2Galβ1-4GlcNAc-AEAB                           | H2         | 15926       | 638     | 13025       | 612     | 1           | 0       | 14          | 1       |
| 2a       | Fuca1-2Galβ1-4Glc-AEAB                              | H5         | 17722       | 1230    | 10925       | 481     | 1           | 1       | 14          | 3       |
| 3a       | Fuca1-2Galβ1-3GlcNAcβ1-3Gal-AEAB                    | H1         | 13508       | 543     | 6           | 4       | 0           | 1       | 14          | 1       |
| 4a       | Fuca1-2Galβ1-4GlcNAcβ1-3Gal-AEAB                    | H2         | 11321       | 499     | 6735        | 307     | 2           | 2       | 40          | 50      |
| 5a       | Fuca1-2Galβ1-3GlcNAcβ1-3Galβ1-4Glc-AEAB             | H1         | 18637       | 553     | 9           | 1       | 1           | 0       | 13          | 1       |
| 6a       | GalNAcα1-3(Fuca1-2)Galβ1-4GlcNAcβ1-3Gal-AEAB        | A2         | 229         | 9       | 2           | 1       | 0           | 1       | 1439        | 117     |
| 7a       | GalNAcα1-3(Fuca1-2)Galβ1-4GlcNAcβ1-3Galβ1-4Glc-AEAB | A2         | 3           | 2       | 2           | 1       | 1           | 1       | 7592        | 408     |
| 8a       | Galα1-3(Fuca1-2)Galβ1-4Glc-AEAB                     | B5         | 10611       | 266     | 2           | 1       | 12310       | 529     | 14          | 4       |
| 9a       | Galα1-3(Fuca1-2)Galβ1-3GlcNAcβ1-3Gal-AEAB           | B1         | 94          | 14      | 2           | 0       | 12312       | 498     | 16          | 2       |
| 10a      | Galα1-3(Fuca1-2)Galβ1-4GlcNAcβ1-3Gal-AEAB           | B2         | 399         | 31      | 2           | 1       | 12639       | 683     | 15          | 1       |
| 11a      | Galα1-3(Fuca1-2)Galβ1-3GlcNAcβ1-3Galβ1-4Glc-AEAB    | B1         | 2           | 1       | 7           | 10      | 9519        | 820     | 17          | 2       |
| 12a      | Galα1-3(Fuca1-2)Galβ1-4GlcNAcβ1-3Galβ1-4Glc-AEAB    | B2         | 244         | 22      | 2           | 0       | 23760       | 828     | 22          | 18      |
| 13a      | Galα1-3(Fuca1-2)Galβ1-3GalNAcβ1-3Gal-AEAB           | B4         | 1           | 1       | 3           | 1       | 9649        | 2740    | 10          | 3       |
| 14a      | Galα1-3(Fuca1-2)Galβ1-4(Fuca1-2)Glc-AEAB            | B5         | 15731       | 1782    | 2           | 1       | 16725       | 2360    | 10          | 1       |
| 15a      | Galβ1-4(Fuca1-3)GlcNAc-AEAB                         | Lex        | 13431       | 641     | 12          | 1       | 1           | 1       | 16          | 3       |
| 16a      | Galβ1-4(Fuca1-3)GlcNAcβ1-3Galβ1-4(Fuca1-3)Glc-AEAB  | Lex        | 16030       | 707     | 26          | 6       | 2           | 2       | 30          | 34      |
| 17a      | Fuca1-2Galβ1-4(Fuca1-3)GlcNAc-AEAB                  | Ley        | 18498       | 907     | 1161        | 103     | 3           | 1       | 14          | 1       |
| 18a      | Fuca1-2Galβ1-4(Fuca1-3)GlcNAcβ1-3Gal-AEAB           | Ley        | 15442       | 429     | 12365       | 552     | 3           | 1       | 9           | 1       |
| 19a      | Neu5Acα2-3Galβ1-4(Fuca1-3)GlcNAc-AEAB               | Slex       | 17269       | 884     | 2           | 0       | 1           | 1       | 40          | 43      |
| 20a      | Neu5Acα2-3Galβ1-4(Fuca1-3)GlcNAcβ1-3Gal-AEAB        | Slex       | 18846       | 1858    | 2           | 0       | 3           | 1       | 9           | 2       |
| 21a      | Galβ1-3(Fuca1-4)GlcNAcβ1-3Gal-AEAB                  | Lea        | 15304       | 1900    | 35          | 6       | 3           | 1       | 10          | 2       |
| 22a      | Galβ1-3(Fuca1-4)GlcNAcβ1-3Galβ1-4(Fuca1-3)Glc-AEAB  | Lea        | 16011       | 1221    | 50          | 10      | 3           | 1       | 9           | 3       |
| 23a      | Fuca1-2Galβ1-3(Fuca1-4)GlcNAcβ1-3Gal-AEAB           | Leb        | 15071       | 1776    | 2           | 1       | 3           | 1       | 8           | 3       |
| 24a      | Fuca1-2Galβ1-4(Fuca1-2)Glc-AEAB                     |            | 16950       | 2048    | 8169        | 1466    | -1          | 1       | 11          | 3       |
| 25a      | Streptavidin Cy5 / A488 Hydrazide landing light     |            | 580         | 403     | 1013        | 444     | 1280        | 464     | 904         | 396     |
| 1b       | Fuca1-2Galβ1-4GlcNAc-MAPA                           | H2         | 14565       | 878     | 10731       | 269     | 0           | 1       | 11          | 2       |
| 2b       | Fuca1-2Galβ1-4Glc-MAPA                              | H5         | 17484       | 363     | 14333       | 254     | 0           | 1       | 13          | 2       |
| 3b       | Fuca1-2Galβ1-3GlcNAcβ1-3Gal-MAPA                    | H1         | 7196        | 233     | 3           | 1       | 0           | 1       | 12          | 1       |
| 4b       | Fuca1-2Galβ1-4GlcNAcβ1-3Gal-MAPA                    | H2         | 21015       | 299     | 15775       | 283     | 1           | 1       | 13          | 4       |
| 5b       | Fuca1-2Galβ1-3GlcNAcβ1-3Galβ1-4Glc-MAPA             | H1         | 12335       | 296     | 2           | 0       | 1           | 1       | 14          | 2       |
| 6b       | GalNAcα1-3(Fuca1-2)Galβ1-4GlcNAcβ1-3Gal-MAPA        | A2         | 5           | 1       | 2           | 1       | 1           | 1       | 971         | 90      |
| 7b       | GalNAcα1-3(Fuca1-2)Galβ1-4GlcNAcβ1-3Galβ1-4Glc-MAPA | A2         | 3           | 1       | 2           | 1       | 1           | 1       | 1204        | 112     |
| 8b       | Galα1-3(Fuca1-2)Galβ1-4Glc-MAPA                     | B5         | 2201        | 152     | 2           | 0       | 9127        | 660     | 15          | 1       |
| 9b       | Galα1-3(Fuca1-2)Galβ1-3GlcNAcβ1-3Gal-MAPA           | B1         | 4           | 1       | 2           | 0       | 6686        | 373     | 16          | 2       |

|     |                                                                                   |      |       |      |       |      |       |      |    |    |
|-----|-----------------------------------------------------------------------------------|------|-------|------|-------|------|-------|------|----|----|
| 10b | Gal $\alpha$ 1-3(Fuca1-2)Gal $\beta$ 1-4GlcNAc $\beta$ 1-3Gal-MAPA                | B2   | 4     | 1    | 2     | 0    | 7009  | 385  | 15 | 3  |
| 11b | Gal $\alpha$ 1-3(Fuca1-2)Gal $\beta$ 1-3GlcNAc $\beta$ 1-3Gal $\beta$ 1-4Glc-MAPA | B1   | 3     | 1    | 3     | 1    | 7463  | 596  | 15 | 3  |
| 12b | Gal $\alpha$ 1-3(Fuca1-2)Gal $\beta$ 1-4GlcNAc $\beta$ 1-3Gal $\beta$ 1-4Glc-MAPA | B2   | 2     | 1    | 2     | 1    | 14884 | 617  | 15 | 1  |
| 13b | Gal $\alpha$ 1-3(Fuca1-2)Gal $\beta$ 1-3GalNAc $\beta$ 1-3Gal-MAPA                | B4   | 10    | 1    | 5     | 1    | 6520  | 2564 | 13 | 3  |
| 14b | Gal $\alpha$ 1-3(Fuca1-2)Gal $\beta$ 1-4(Fuca1-2)Glc-MAPA                         | B5   | 2052  | 384  | 63    | 12   | 11609 | 3584 | 13 | 1  |
| 15b | Gal $\beta$ 1-4(Fuca1-3)GlcNAc-MAPA                                               | Lex  | 15578 | 559  | 2     | 1    | 2     | 1    | 16 | 2  |
| 16b | Gal $\beta$ 1-4(Fuca1-3)GlcNAc $\beta$ 1-3Gal $\beta$ 1-4(Fuca1-3)Glc-MAPA        | Lex  | 9509  | 343  | 231   | 17   | 125   | 5    | 12 | 2  |
| 17b | Fuca1-2Gal $\beta$ 1-4(Fuca1-3)GlcNAc-MAPA                                        | Ley  | 19884 | 819  | 13101 | 625  | 3     | 1    | 22 | 14 |
| 18b | Fuca1-2Gal $\beta$ 1-4(Fuca1-3)GlcNAc $\beta$ 1-3Gal-MAPA                         | Ley  | 16962 | 337  | 4574  | 133  | 3     | 1    | 22 | 19 |
| 19b | Neu5Ac $\alpha$ 2-3Gal $\beta$ 1-4(Fuca1-3)GlcNAc-MAPA                            | Slex | 13801 | 532  | 2     | 0    | 3     | 0    | 14 | 3  |
| 20b | Neu5Ac $\alpha$ 2-3Gal $\beta$ 1-4(Fuca1-3)GlcNAc $\beta$ 1-3Gal-MAPA             | Slex | 13067 | 1581 | 2     | 1    | 3     | 1    | 9  | 2  |
| 21b | Gal $\beta$ 1-3(Fuca1-4)GlcNAc $\beta$ 1-3Gal-MAPA                                | Lea  | 12611 | 2190 | 36    | 6    | 3     | 1    | 9  | 3  |
| 22b | Gal $\beta$ 1-3(Fuca1-4)GlcNAc $\beta$ 1-3Gal $\beta$ 1-4(Fuca1-3)Glc-MAPA        | Lea  | 14012 | 1777 | 42    | 9    | 0     | 1    | 9  | 1  |
| 23b | Fuca1-2Gal $\beta$ 1-3(Fuca1-4)GlcNAc $\beta$ 1-3Gal-MAPA                         | Leb  | 11558 | 1476 | 22    | 39   | 0     | 1    | 7  | 2  |
| 24b | Fuca1-2Gal $\beta$ 1-4(Fuca1-2)Glc-MAPA                                           |      | 17507 | 1561 | 11259 | 2077 | -1    | 1    | 9  | 2  |
| 25b | Negative Control                                                                  |      | 9     | 2    | 1     | 1    | -4    | 1    | 8  | 2  |

The original binding signals (RFUs) elicited with anti-blood group antibodies.

| Probe ID | Glycan structure                                                                     | Blood type | Human DC-SIGN |         | anti-CD15   |         | anti-SLe <sup>x</sup> /SLe <sup>a</sup> |         | anti-Le <sup>a</sup> |         |
|----------|--------------------------------------------------------------------------------------|------------|---------------|---------|-------------|---------|-----------------------------------------|---------|----------------------|---------|
|          |                                                                                      |            | Average RFU   | Std Dev | Average RFU | Std Dev | Average RFU                             | Std Dev | Average RFU          | Std Dev |
| 1a       | Fuca1-2Gal $\beta$ 1-4GlcNAc-AEAB                                                    | H2         | 20163         | 7232    | 3           | 5       | 5                                       | 4       | 5                    | 3       |
| 2a       | Fuca1-2Gal $\beta$ 1-4Glc-AEAB                                                       | H5         | 17918         | 751     | 6           | 3       | 6                                       | 3       | 4                    | 3       |
| 3a       | Fuca1-2Gal $\beta$ 1-3GlcNAc $\beta$ 1-3Gal-AEAB                                     | H1         | 0             | 26      | 4           | 1       | 5                                       | 6       | 6                    | 3       |
| 4a       | Fuca1-2Gal $\beta$ 1-4GlcNAc $\beta$ 1-3Gal-AEAB                                     | H2         | 3923          | 1985    | 4           | 10      | 260                                     | 35      | 237                  | 29      |
| 5a       | Fuca1-2Gal $\beta$ 1-3GlcNAc $\beta$ 1-3Gal $\beta$ 1-4Glc-AEAB                      | H1         | 1403          | 319     | 7           | 3       | 10                                      | 6       | 8                    | 5       |
| 6a       | GalNAc $\alpha$ 1-3(Fuca1-2)Gal $\beta$ 1-4GlcNAc $\beta$ 1-3Gal-AEAB                | A2         | 0             | 8       | 4           | 1       | 15                                      | 12      | 4                    | 1       |
| 7a       | GalNAc $\alpha$ 1-3(Fuca1-2)Gal $\beta$ 1-4GlcNAc $\beta$ 1-3Gal $\beta$ 1-4Glc-AEAB | A2         | 0             | 153     | 5           | 1       | 15                                      | 4       | 7                    | 2       |
| 8a       | Gal $\alpha$ 1-3(Fuca1-2)Gal $\beta$ 1-4Glc-AEAB                                     | B5         | 1346          | 162     | 4           | 5       | 4                                       | 2       | 2                    | 1       |
| 9a       | Gal $\alpha$ 1-3(Fuca1-2)Gal $\beta$ 1-3GlcNAc $\beta$ 1-3Gal-AEAB                   | B1         | 0             | 13      | 3           | 1       | 6                                       | 3       | 3                    | 3       |
| 10a      | Gal $\alpha$ 1-3(Fuca1-2)Gal $\beta$ 1-4GlcNAc $\beta$ 1-3Gal-AEAB                   | B2         | 0             | 18      | 5           | 2       | 4                                       | 2       | 2                    | 2       |
| 11a      | Gal $\alpha$ 1-3(Fuca1-2)Gal $\beta$ 1-3GlcNAc $\beta$ 1-3Gal $\beta$ 1-4Glc-AEAB    | B1         | 0             | 25      | 5           | 2       | 5                                       | 5       | 2                    | 1       |
| 12a      | Gal $\alpha$ 1-3(Fuca1-2)Gal $\beta$ 1-4GlcNAc $\beta$ 1-3Gal $\beta$ 1-4Glc-AEAB    | B2         | 31            | 18      | 4           | 1       | 0                                       | 4       | 1                    | 1       |
| 13a      | Gal $\alpha$ 1-3(Fuca1-2)Gal $\beta$ 1-3GalNAc $\beta$ 1-3Gal-AEAB                   | B4         | 0             | 28      | 4           | 1       | 4                                       | 3       | 1                    | 2       |
| 14a      | Gal $\alpha$ 1-3(Fuca1-2)Gal $\beta$ 1-4(Fuca1-2)Glc-AEAB                            | B5         | 21224         | 2408    | 6           | 2       | 4                                       | 3       | 1                    | 1       |
| 15a      | Gal $\beta$ 1-4(Fuca1-3)GlcNAc-AEAB                                                  | Lex        | 191           | 74      | 6           | 1       | 9                                       | 7       | 1                    | 1       |
| 16a      | Gal $\beta$ 1-4(Fuca1-3)GlcNAc $\beta$ 1-3Gal $\beta$ 1-4(Fuca1-3)Glc-AEAB           | Lex        | 42192         | 5536    | 26199       | 2149    | 2                                       | 2       | 1                    | 2       |
| 17a      | Fuca1-2Gal $\beta$ 1-4(Fuca1-3)GlcNAc-AEAB                                           | Ley        | 26822         | 3232    | 7           | 2       | 10                                      | 6       | 2                    | 3       |

|     |                                                     |      |       |      |       |      |       |      |       |      |
|-----|-----------------------------------------------------|------|-------|------|-------|------|-------|------|-------|------|
| 18a | Fuca1-2Galβ1-4(Fuca1-3)GlcNAcβ1-3Gal-AEAB           | Ley  | 41164 | 2729 | 4     | 3    | 5     | 5    | 1     | 1    |
| 19a | Neu5Aca2-3Galβ1-4(Fuca1-3)GlcNAc-AEAB               | Slex | 15    | 23   | 3     | 1    | 4     | 5    | 1     | 1    |
| 20a | Neu5Aca2-3Galβ1-4(Fuca1-3)GlcNAcβ1-3Gal-AEAB        | Slex | 27    | 13   | 5     | 1    | 12530 | 1257 | 8     | 3    |
| 21a | Galβ1-3(Fuca1-4)GlcNAcβ1-3Gal-AEAB                  | Lea  | 21052 | 3352 | 5     | 2    | 0     | 1    | 1395  | 140  |
| 22a | Galβ1-3(Fuca1-4)GlcNAcβ1-3Galβ1-4(Fuca1-3)Glc-AEAB  | Lea  | 43218 | 5679 | 5     | 2    | 1     | 1    | 25744 | 1059 |
| 23a | Fuca1-2Galβ1-3(Fuca1-4)GlcNAcβ1-3Gal-AEAB           | Leb  | 20689 | 2748 | 7     | 4    | 4     | 4    | 2     | 1    |
| 24a | Fuca1-2Galβ1-4(Fuca1-2)Glc-AEAB                     |      | 34828 | 3431 | 6     | 2    | 2     | 1    | 1     | 1    |
| 25a | Streptavidin Cy5 / A488<br>Hydrazide landing light  |      | 2194  | 335  | 35    | 28   | 527   | 155  | 348   | 73   |
| 1b  | Fuca1-2Galβ1-4GlcNAc-MAPA                           | H2   | 6735  | 5844 | 7     | 4    | 3     | 3    | 2     | 1    |
| 2b  | Fuca1-2Galβ1-4Glc-MAPA                              | H5   | 7532  | 386  | 8     | 2    | 10    | 8    | 5     | 2    |
| 3b  | Fuca1-2Galβ1-3GlcNAcβ1-3Gal-MAPA                    | H1   | 0     | 30   | 4     | 1    | 5     | 6    | 7     | 4    |
| 4b  | Fuca1-2Galβ1-4GlcNAcβ1-3Gal-MAPA                    | H2   | 27234 | 3608 | 4     | 2    | 3     | 3    | 3     | 1    |
| 5b  | Fuca1-2Galβ1-3GlcNAcβ1-3Galβ1-4Glc-MAPA             | H1   | 33    | 10   | 5     | 2    | 7     | 4    | 3     | 2    |
| 6b  | GalNAca1-3(Fuca1-2)Galβ1-4GlcNAcβ1-3Gal-MAPA        | A2   | 0     | 14   | 3     | 1    | 5     | 5    | 1     | 1    |
| 7b  | GalNAca1-3(Fuca1-2)Galβ1-4GlcNAcβ1-3Galβ1-4Glc-MAPA | A2   | 0     | 27   | 4     | 1    | 6     | 3    | 1     | 1    |
| 8b  | Galα1-3(Fuca1-2)Galβ1-4Glc-MAPA                     | B5   | 0     | 11   | 3     | 1    | 3     | 1    | 1     | 1    |
| 9b  | Galα1-3(Fuca1-2)Galβ1-3GlcNAcβ1-3Gal-MAPA           | B1   | 15    | 18   | 3     | 1    | 8     | 4    | 2     | 2    |
| 10b | Galα1-3(Fuca1-2)Galβ1-4GlcNAcβ1-3Gal-MAPA           | B2   | 15    | 23   | 4     | 1    | 2     | 3    | 2     | 3    |
| 11b | Galα1-3(Fuca1-2)Galβ1-3GlcNAcβ1-3Galβ1-4Glc-MAPA    | B1   | 0     | 20   | 4     | 2    | 3     | 1    | 2     | 1    |
| 12b | Galα1-3(Fuca1-2)Galβ1-4GlcNAcβ1-3Galβ1-4Glc-MAPA    | B2   | 19    | 7    | 5     | 1    | 0     | 1    | 1     | 1    |
| 13b | Galα1-3(Fuca1-2)Galβ1-3GalNAcβ1-3Gal-MAPA           | B4   | 0     | 14   | 3     | 1    | 9     | 2    | 2     | 1    |
| 14b | Galα1-3(Fuca1-2)Galβ1-4(Fuca1-2)Glc-MAPA            | B5   | 18225 | 2637 | 3     | 4    | 70    | 5    | 1     | 0    |
| 15b | Galβ1-4(Fuca1-3)GlcNAc-MAPA                         | Lex  | 14087 | 1417 | 2935  | 1684 | 2     | 1    | 1     | 1    |
| 16b | Galβ1-4(Fuca1-3)GlcNAcβ1-3Galβ1-4(Fuca1-3)Glc-MAPA  | Lex  | 23756 | 1020 | 17498 | 1060 | 540   | 69   | 1     | 1    |
| 17b | Fuca1-2Galβ1-4(Fuca1-3)GlcNAc-MAPA                  | Ley  | 27759 | 1658 | 5     | 1    | 3     | 4    | 0     | 1    |
| 18b | Fuca1-2Galβ1-4(Fuca1-3)GlcNAcβ1-3Gal-MAPA           | Ley  | 29569 | 481  | 3     | 3    | 13    | 7    | 1     | 1    |
| 19b | Neu5Aca2-3Galβ1-4(Fuca1-3)GlcNAc-MAPA               | Slex | 0     | 30   | 5     | 1    | 9520  | 2118 | 0     | 1    |
| 20b | Neu5Aca2-3Galβ1-4(Fuca1-3)GlcNAcβ1-3Gal-MAPA        | Slex | 32    | 20   | 5     | 1    | 10785 | 1049 | 2     | 1    |
| 21b | Galβ1-3(Fuca1-4)GlcNAcβ1-3Gal-MAPA                  | Lea  | 18606 | 5528 | 4     | 2    | 0     | 1    | 19027 | 617  |
| 22b | Galβ1-3(Fuca1-4)GlcNAcβ1-3Galβ1-4(Fuca1-3)Glc-MAPA  | Lea  | 35680 | 6528 | 6     | 2    | 1     | 1    | 36835 | 1787 |
| 23b | Fuca1-2Galβ1-3(Fuca1-4)GlcNAcβ1-3Gal-MAPA           | Leb  | 13930 | 3218 | 5     | 1    | 1     | 1    | 2     | 1    |
| 24b | Fuca1-2Galβ1-4(Fuca1-2)Glc-MAPA                     |      | 29794 | 814  | 4     | 1    | 6     | 5    | 1     | 1    |
| 25b | Negative Control                                    |      | 0     | 21   | 1     | 1    | 0     | 1    | 1     | 1    |
